# **P2Y6 receptor signaling in natural killer cells impairs insulin sensitivity in obesity**

Anna Sieben<sup>1,2</sup>, Anne Christine Hausen<sup>1</sup>, Paul Klemm<sup>1</sup>, Alexander Jais<sup>1,3</sup>, Christian Heilinger<sup>1</sup>, Jens Alber<sup>1</sup>, Kat Folz-Donahue<sup>4</sup>, Lena Schumacher<sup>4</sup>, Janine Altmüller<sup>5</sup>, Marek Franitza<sup>5</sup>, Patrick Giavalisco<sup>6</sup>, Yvonne Hinze<sup>6</sup>, Susanne Brodesser<sup>7</sup>, Christian Kukat<sup>4</sup>, Sebastian Theurich<sup>8,9</sup>, Jens C. Brüning<sup>1,2,10,#</sup>.

<sup>1</sup>Max Planck Institute for Metabolism Research, AG Neuronal Control of Metabolism, Gleueler Straße 50, 50931 Cologne, Germany

<sup>2</sup>Center for Endocrinology, Diabetes and Preventive Medicine (CEDP), University Hospital Cologne, Kerpener Straße 26, 50924 Cologne, Germany

<sup>3</sup>HI-MAG Helmholtz Institute for Metabolic, Obesity and Vascular Research, AG Diet-Induced Metabolic Alterations, Philipp-Rosenthal-Str. 27, 04103 Leipzig, Germany

<sup>4</sup>Max Planck Institute for Biology of Ageing, FACS & Imaging Core Facility, Joseph-Stelzmann-Str. 9B, 50931 Cologne, Germany

<sup>5</sup>Cologne Center for Genomics (CCG), University of Cologne, Next-Generation-Sequencing Core Facility, Weyertal 115b, 50931 Cologne, Germany

<sup>6</sup>Max Planck Institute for Biology of Ageing, Metabolomics Core Facility, Joseph-Stelzmann-Str. 9b, 50931 Cologne, Germany

<sup>7</sup>CECAD Research Center, Lipidomics/Metabolomics Facility, Joseph-Stelzmann-Str. 26, 50931 Cologne, Germany

<sup>8</sup>Department of Medicine III, University Hospital, LMU Munich, Munich, Germany

<sup>9</sup>Cancer and Immunometabolism Research Group, Gene Center LMU, Feodor-Lynen-Str. 25, 81377 Munich, Germany

<sup>10</sup>Lead contact

#Address correspondence to:

Jens C. Brüning, M.D.

Max Planck Institute for Metabolism Research

Gleueler Str. 50

50931 Cologne, Germany

Phone: +49-221 4726202

Fax: +49-221 4726203

e-mail: bruening@sf.mpg.de

## Abstract

Natural killer (NK) cells contribute to the development of obesity-associated insulin resistance and have previously been shown to up-regulate the expression of the P2Y purinoreceptor 6 (P2Y6R) upon high fat diet (HFD)-induced obesity. Here, we reveal that NK cell-specific inactivation of the P2Y6R gene improves insulin sensitivity in obese mice and reduces the expression of chemokines in adipose tissue infiltrating NK-cells. Obese mice lacking P2Y6R specifically in NK cells exhibited a reduction in adipose tissue inflammation, exhibited improved insulin-stimulated suppression of lipolysis in adipose tissue and a reduction in hepatic glucose production, leading to an overall improvement of systemic insulin sensitivity. In contrast, myeloid lineage specific P2Y6R inactivation does not affect energy or glucose homeostasis in obesity. Collectively, we show that P2Y6R signaling in NK cells contributes to the development of obesity-associated insulin resistance and thus might be a future target for the treatment of obesity-associated insulin resistance and type 2 diabetes.

## Introduction

More than 1.9 billion adults were overweight in 2016. Of these, over 650 million adults were obese (WHO, 2021), reflecting a slow but dangerous global pandemic that started more than 40 years ago (WHO, 2021). Obesity not only increases the risk of co-morbidities such as cardiovascular diseases, cancer and diabetes mellitus (Guh *et al.*, 2009) but also has profound effects on the immune system (De Heredia *et al.*, 2012). Obesity is associated with a chronic low-grade inflammation, termed metaflammation (De Heredia *et al.*, 2012), which is reflected in an increased number of macrophages (Weisberg *et al.*, 2003), T cells and natural killer (NK) cells (Theurich *et al.*, 2017) infiltrating the adipose tissue and a rise in pro-inflammatory molecules in tissues and blood (Xu *et al.*, 2003; Schmidt *et al.*, 2015).

Nucleotides such as adenosine and uridine are critical building blocks of the genetic code and at the same time key regulators of inflammation (Idzko *et al.*, 2014). Uridine acts as a potent anti-inflammatory molecule during lung inflammation (Evaldsson *et al.*, 2007) and pulmonary fibrosis (Cicko *et al.*, 2015). Here, it affects adhesion between leukocytes and endothelium in a lung inflammation model (Uppugunduri and Gautam, 2004). Plasma uridine concentrations are regulated by fasting and refeeding (Deng *et al.*, 2017), controlled by the circadian rhythm (El Kouni *et al.*, 1990) and exercise (Yamamoto *et al.*, 1997) and positively correlate with insulin resistance and plasma insulin levels (Hamada *et al.*, 2007). Uridine impairs insulin sensitivity and glucose tolerance in mice (Urasaki *et al.*, 2014), has an impact on liver lipid metabolism (Urasaki *et al.*, 2016; Le *et al.*, 2013) as well as is involved in glycogen metabolism (Haugaard *et al.*, 1977).

Moreover, uridine serves as precursor for the synthesis of the nucleotide uridine diphosphate (UDP). Coupled to glucose, this nucleotide is a critical component in the synthesis pathway of glycogen (Berg *et al.*, 2002). At the same time, UDP acts as an extracellular signaling molecule after being released from apoptotic and necrotic cells and serves as danger and find-me signal in order to attract immune cells to the site of inflammation (Elliott *et al.*, 2009). On the other hand, a controlled way of nucleotide release has been reported (Lazarowski *et al.*, 2011). Here, the extracellular nucleotide adenosine triphosphate (ATP) can act as an initiator or terminator of immune responses to induce different effects on immune cells depending on the pattern of P2 receptors engaged, the duration of the stimulus and its concentration in the extracellular milieu (Gorini *et al.*, 2010).

The extracellular nucleotide UDP binds to P2Y6 receptors (P2Y6R) which belong to the family of G-protein coupled receptors. The activation of Gq-coupled P2Y6Rs results in a rise of intracellular calcium concentration leading to an altered activity of kinases such as protein kinase C (PKC), mitogen-activated protein kinase (MAPK) and extracellular signal-regulated kinase (ERK), to changes in transcription and to the release of signaling molecules (Kim *et al.*, 2003; Li *et al.*, 2014; Zhang *et al.*, 2011). In the context of glucose metabolism and obesity it has been shown that UDP-P2Y6R signaling regulates feeding via hypothalamic agouti-related protein (AgRP) neurons (Steculorum *et al.*, 2015) and that P2Y6R action in AgRP neurons contributes to HFD-induced deterioration of insulin sensitivity (Steculorum *et al.*, 2017). Investigations in peripheral organs revealed that adipocyte-specific deletion of P2Y6R protects mice from diet-induced obesity, improves glucose tolerance and insulin sensitivity and reduces systemic inflammation (Jain *et al.*, 2020). In contrast to that, P2Y6R deletion in skeletal muscle resulted in impaired glucose homeostasis (Jain *et al.*, 2020).

P2Y6Rs are also expressed in a variety of immune cells, such as macrophages (Bar *et al.*, 2008; Lattin *et al.*, 2008), T cells (Giannattasio *et al.*, 2011) and microglia (Idzko *et al.*, 2004, Kim *et al.*, 2011). Moreover, expression of P2Y6R is upregulated in NK cells isolated from adipose tissue of mice fed a HFD when compared to lean mice on a control diet (Theurich *et al.*, 2017). NK cells are part of the innate immune system responsible for the recognition and elimination of virus-infected and cancerous cells (Vivier *et al.*, 2008). They are able to destroy target cells via the release and joined action of the cytotoxic mediators perforin and granzyme (Pardo *et al.*, 2002) or through the exocytosis of cytokines such as interferon gamma (IFN $\gamma$ ) and tumor necrosis factor alpha (TNF $\alpha$ ) (Girart *et al.*, 2007; Wang *et al.*, 2012; Jewett *et al.*, 1996). NK cell activity is controlled by the orchestration of activating and inactivating receptors (Bakker *et al.*, 2000; Lanier, 2008) as well as by cytokines such as interleukin (IL) 2 and 15 (Zwirner and Domaica, 2010). Obesity induces lipid accumulation in NK cells, leading to cytotoxic dysfunction, impaired trafficking and reduced anti-tumor responses (Michelet *et al.*, 2018). NK cells derived from adipose tissue of obese mice show an activated immune phenotype and release cytokines that trigger the differentiation and infiltration of macrophages, finally resulting in increased inflammation and promotion of insulin resistance (Wensveen *et al.*, 2015; Lee *et al.*, 2016). The majority of macrophages infiltrating the adipose tissue of obese animals and humans are arranged around dead



135 adipocytes, forming characteristic crown-like structures (CLS) (Murano *et al.*, 2008;  
136 Cinti *et al.*, 2005). These necrotic adipocytes might release UDP as danger signal  
137 leading to an increased infiltration or local proliferation of immune cells, thus promoting  
138 metaflammation and development of insulin resistance.

139         Given the improvement of insulin action in conventional P2Y6R knockout mice  
140 (Steculorum *et al.*, 2017; Jain *et al.*, 2020), and the role of P2Y6R-signaling in immune  
141 cells, we aimed to investigate the role of this receptor in NK cells and macrophages in  
142 the development of obesity-associated metaflammation and insulin resistance. To this  
143 end, we generated mice lacking P2Y6R specifically in these immune compartments.  
144 While ablation of P2Y6R in myeloid lineage cells had no effect on metaflammation and  
145 obesity-associated insulin resistance, obese mice lacking P2Y6R specifically in NK  
146 cells exhibited a reduction in adipose tissue inflammation, exhibited improved insulin-  
147 stimulated suppression of lipolysis in adipose tissue and a reduction in hepatic glucose  
148 production, leading to an overall improvement of systemic insulin sensitivity.  
149 Collectively, these experiments extend the tissue-specific actions of P2Y6R signaling  
150 in obesity, further characterizing P2Y6R inhibition as a novel target for metabolic  
151 diseases.

## Results

### **Deletion of the P2Y6R gene in NK cells does not protect from HFD-induced obesity**

Among other genes, P2Y6R expression contributes to the discrimination of NK cells from lean and obese mice (Theurich *et al.*, 2017). Furthermore, it has been reported that circulating uridine levels are increased in obesity (Steculorum *et al.*, 2015; Deng *et al.*, 2017). To further define potential changes in uridine and UDP in different organismal compartments upon development of HFD-induced obesity and insulin resistance, we compared uridine and UDP levels in plasma, liver, adipocytes and the adipose tissue stromal vascular fraction (SVF) of mice that had been kept on normal chow diet (NCD) or had been exposed to HFD-feeding for 6 or 12 weeks. This analysis revealed increased levels of uridine in plasma of obese compared to lean mice after 12 weeks of HFD feeding (Suppl. Fig. S1A), while uridine levels in liver and SVF increased already at 6 weeks of HFD feeding and remained elevated until 12 weeks of HFD feeding (Suppl. Fig. S1B, C), while adipocyte uridine concentration increased after 6 weeks of HFD feeding, but reached comparable levels to NCD-fed mice after 12 weeks (Suppl. Fig. S1D). While UDP levels in plasma paralleled the increase of circulating uridine 12 weeks after HFD-feeding (Suppl. Fig. S1E) as well as the increases in adipose tissue SVF 6 and 12 weeks after high fat diet feeding (Suppl. Fig. S1G), hepatic UDP levels remained unaltered upon HFD feeding (Suppl. Fig. S1F), and adipocyte UDP levels increased only after prolonged HFD feeding (Suppl. Fig. S1H). These experiments indicate a coordinated regulation of uridine and UDP concentrations in plasma and SVF, while UDP synthesis in liver and adipocytes does not appear to be directly linked to changes in local uridine concentrations.

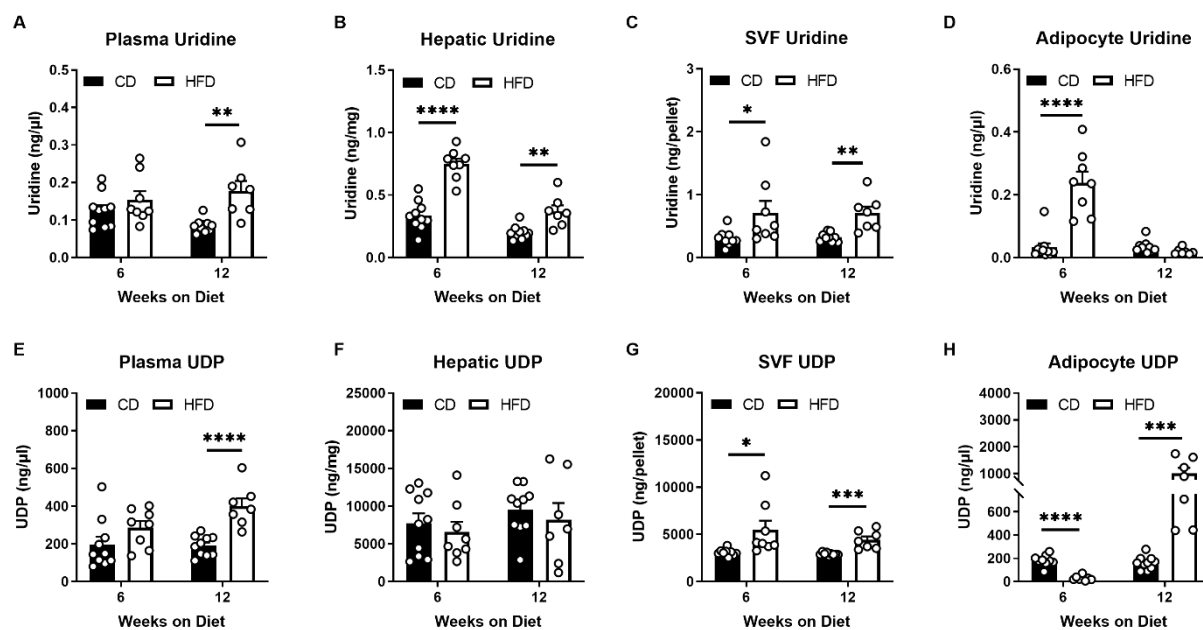

**Fig. S1: Uridine and UDP levels are increased upon HFD feeding.** Two cohorts of C57Bl6 mice were either fed a normal chow diet (NCD) or HFD for 6 (NCD, n=10; HFD, n=8) or 12 (NCD, n=10; HFD, n=7) weeks. Uridine and UDP levels were determined in plasma (A, E), liver (B, F), cells of the stromal vascular fraction (SVF) (C, G) and in adipocytes (D, H). Statistics: Unpaired two-tailed t-test, \*p<0.05, \*\*p<0.01, \*\*\*p<0.001, \*\*\*\*p<0.0001. Data are represented as mean ± SEM. ○ denotes individual mice.

In light of the coordinated regulation of uridine and UDP in plasma and adipose tissue SVF, compartments which directly interact with immune cells, we aimed to investigate the impact of P2Y6R signaling in NK cells on body weight development, glucose metabolism, and obesity-associated metaflammation *in vivo*. In order to specifically delete the P2Y6R in NK cells, we crossed mice carrying a loxP-flanked P2Y6R gene (Jain *et al.*, 2020) with Ncr1-Cre mice (Eckelhardt *et al.*, 2011). PCR analysis of DNA isolated from NK cells of control (P2Y6<sup>fl/fl</sup>) or NK cell-specific P2Y6-deleted (P2Y6<sup>ΔNcr1</sup>) mice confirmed successful and specific disruption of P2Y6R expression in NK cells (Suppl. Fig. S2). Starting at the age of 6 weeks, P2Y6<sup>ΔNcr1</sup> mice and their respective littermate controls were fed a HFD or control diet (CD). HFD feeding did not result in any differences in body weight between genotypes in male mice (Fig.1A), while female P2Y6<sup>ΔNcr1</sup> mice exhibited a mild protection from HFD-induced weight gain upon prolonged HFD-feeding (Suppl. Fig. S3A). Consistent with unaltered body weight development, the relative amount of lean and fat mass of male mice after 15 weeks on HFD was not different between genotypes (Fig. 1B). In line with this, male P2Y6<sup>ΔNcr1</sup> mice did not exhibit any differences in food intake (Suppl. Fig. S4A), water consumption (Suppl. Fig.

195 S4B), energy expenditure (Fig. S4C) or locomotor activity (Fig. S4D) compared with  
196 control mice on HFD. However, after 14 weeks of HFD feeding we could observe a  
197 slight reduction in liver weights in male (Fig. 1C) and female (Suppl. Fig. S3B)  
198 P2Y6<sup>ΔNcr1</sup> mice, as well as a decrease in fasted leptin levels in male P2Y6<sup>ΔNcr1</sup> mice  
199 compared to their control littermates (Fig. 1D). Collectively, NK-cell P2Y6R signaling  
200 has no major impact on energy homeostasis and body weight control in obesity, while  
201 it appears to affect liver weight in obesity.  
202

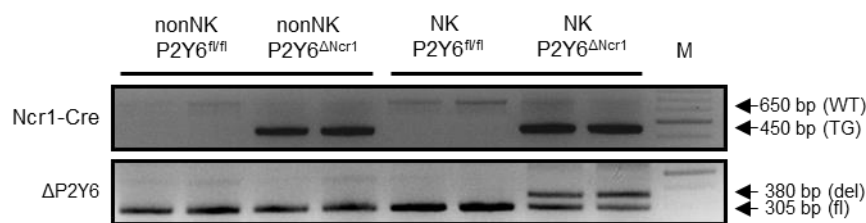

**Fig. S2: P2Y6R is selectively deleted in NK cells.** Splenic cells from P2Y6<sup>fl/fl</sup> (n=2) and P2Y6<sup>ΔNcr1</sup> (n=2) mice were separated with magnetic beads resulting in two fractions: NK cells and nonNK cells. Genomic DNA was extracted from each group. Genotyping for P2Y6R was performed by competitive PCR using the primers listed in table 1 which resulted in a 305 bp PCR-product (floxed) and a 370 bp PCR-product (P2Y6R deletion) in NK cells isolated from P2Y6<sup>ΔNcr1</sup> (Ncr1-Cre positive mice (TG band 450 bp)). This deletion band was neither detected in NK cells from P2Y6<sup>fl/fl</sup>, (Ncr1-Cre negative mice (WT band 650

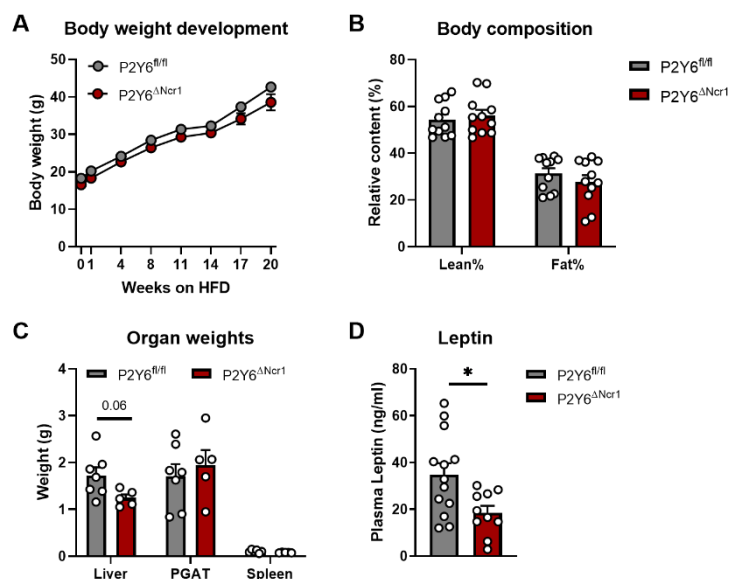

bp)) nor in nonNK cells of either genotype.

**Fig. 1: Deletion of the P2Y6R gene from NK cells does not affect energy homeostasis in mice on HFD.** (A) Body weight development was assessed over a period of 20 weeks in transgenic mice lacking P2Y6R expression in NK cells (P2Y6<sup>ΔNcr1</sup>, n=11) and littermate control mice (P2Y6<sup>fl/fl</sup>, n=11) subjected to HFD feeding. (B) Body composition of P2Y6<sup>fl/fl</sup> (n=11) and P2Y6<sup>ΔNcr1</sup> (n=11) mice after 15-16 weeks on HFD was determined by  $\mu$ -CT analysis. (C) Organ weights of P2Y6<sup>fl/fl</sup> (n=7) and P2Y6<sup>ΔNcr1</sup> (n=5) mice after 14 weeks on HFD. (D) Plasma leptin levels of P2Y6<sup>fl/fl</sup> (n=13) and P2Y6<sup>ΔNcr1</sup> (n=10) mice fed a HFD for 14 weeks and fasted for 16 hours were analyzed by ELISA. Statistics: (A) Two-way RM ANOVA with Sidak's multiple comparison test. (B-D) Unpaired two-tailed t-test, \*p $\leq$ 0.05. Data are represented as mean  $\pm$  SEM.  $\circ$  denotes individual mice.

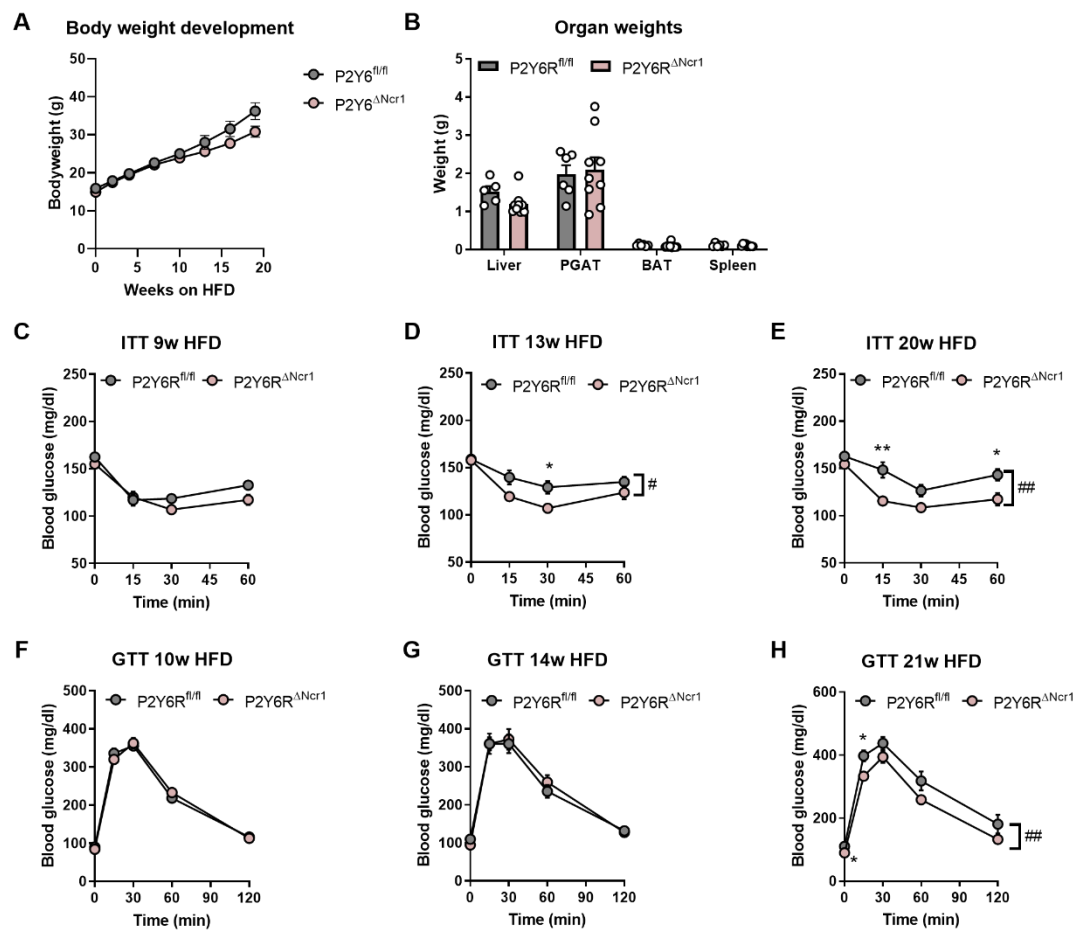

**Fig. S3: Deletion of P2Y6R from NK cells improves insulin sensitivity in female mice on HFD.** (A) Body weight development in HFD-fed female mice (P2Y6<sup>fl/fl</sup>, n=16; P2Y6<sup>ΔNcr1</sup>, n=15) (B) Organ weights after 16 weeks of HFD-feeding (P2Y6<sup>fl/fl</sup>, n=5; P2Y6<sup>ΔNcr1</sup>, n=9) (C-E) Female transgenic mice lacking P2Y6R expression in NK cells (P2Y6<sup>ΔNcr1</sup>, n=15) and littermate control mice (P2Y6<sup>fl/fl</sup>, n=16) fed a HFD for 9 weeks (C), 13 weeks (D) and 20 weeks (E) were subjected to an insulin tolerance test (ITT). (F-H) Glucose tolerance tests (GTT) were performed in female P2Y6<sup>fl/fl</sup> (n=16) and P2Y6<sup>ΔNcr1</sup> (n=15) after 10 weeks (F), 14 weeks (G) and 21 weeks (H) on HFD. Statistics: (A, C-H) Two-way RM ANOVA with Sidak's multiple comparison test, \*p≤0.05, \*\*p≤0.01; genotype: #p≤0.05, ###p≤0.01. Error bars represent SEM. (B, I-K) Unpaired two-tailed t-test, \*p≤0.05. Data are represented as mean ± SEM. ○ denotes individual mice.

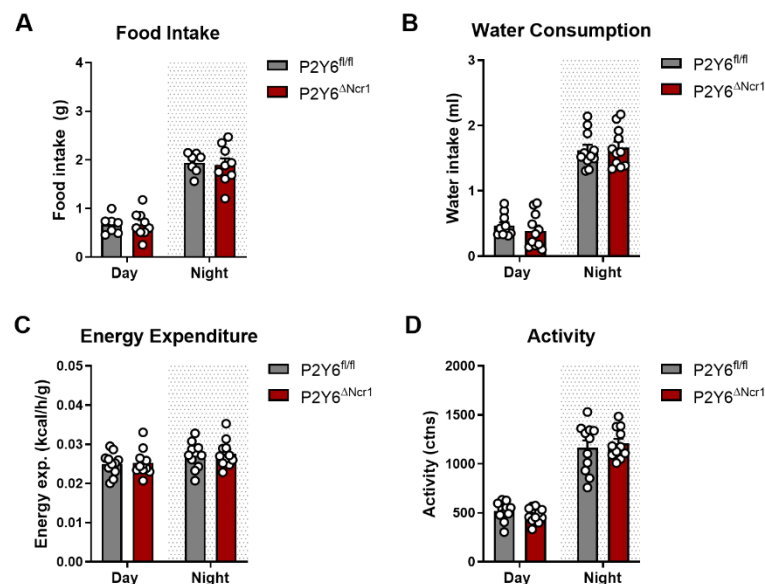

**Fig. S4: NK cell-specific deletion of P2Y6R does not affect food intake or energy expenditure in male mice on HFD.** Indirect calorimetry was performed in P2Y6<sup>fl/fl</sup> (n=11) and P2Y6<sup>ΔNcr1</sup> (n=11) mice after 14 weeks on HFD. Data are shown as average values for day and night. **(A)** Food intake. **(B)** Water consumption. **(C)** Energy expenditure normalized to lean mass. **(D)** Average activity counts. Statistics: (A-D) Unpaired two-tailed t-test, \*p≤0.05. Data are represented as mean ± SEM. ○ denotes individual mice.

## P2Y6R signaling in natural killer cells impairs insulin sensitivity in HFD mice

Next, we aimed to determine the impact of P2Y6R signaling in NK cells on glucose metabolism and insulin sensitivity. To this end, we performed insulin tolerance tests (ITT) and glucose tolerance tests (GTT) at various timepoints upon exposure to CD or HFD. Compared to controls, deletion of the P2Y6R from NK cells improved insulin sensitivity after 13 and 20 weeks of HFD feeding in both genders (Fig. 2A-C and Suppl. Fig. S3C-E) but not in male mice fed a control diet (Suppl. Fig. S5C-E). However, glucose tolerance was not affected by NK cell-specific P2Y6R deletion neither on HFD (Fig. 2D-F and Suppl. Fig. S3F-H) nor on CD (Suppl. Fig. S5F-H). While we did not observe any differences in fasted blood glucose levels between P2Y6<sup>ΔNcr1</sup> mice and their control littermates on HFD (Fig. 2G), fasted insulin concentrations were reduced in P2Y6<sup>ΔNcr1</sup> mice as early as after 10 weeks of HFD feeding (Fig. 2H) concomitant with a reduction of the homeostasis model assessment index for insulin resistance (HOMA-IR) (Fig. 2I). These effects were HFD-specific and could not be observed in mice on control diet (Suppl. Fig. S5I-J). Taken together, abrogation of P2Y6R-signaling from NK cells, partially protects from the development of obesity-associated insulin resistance.

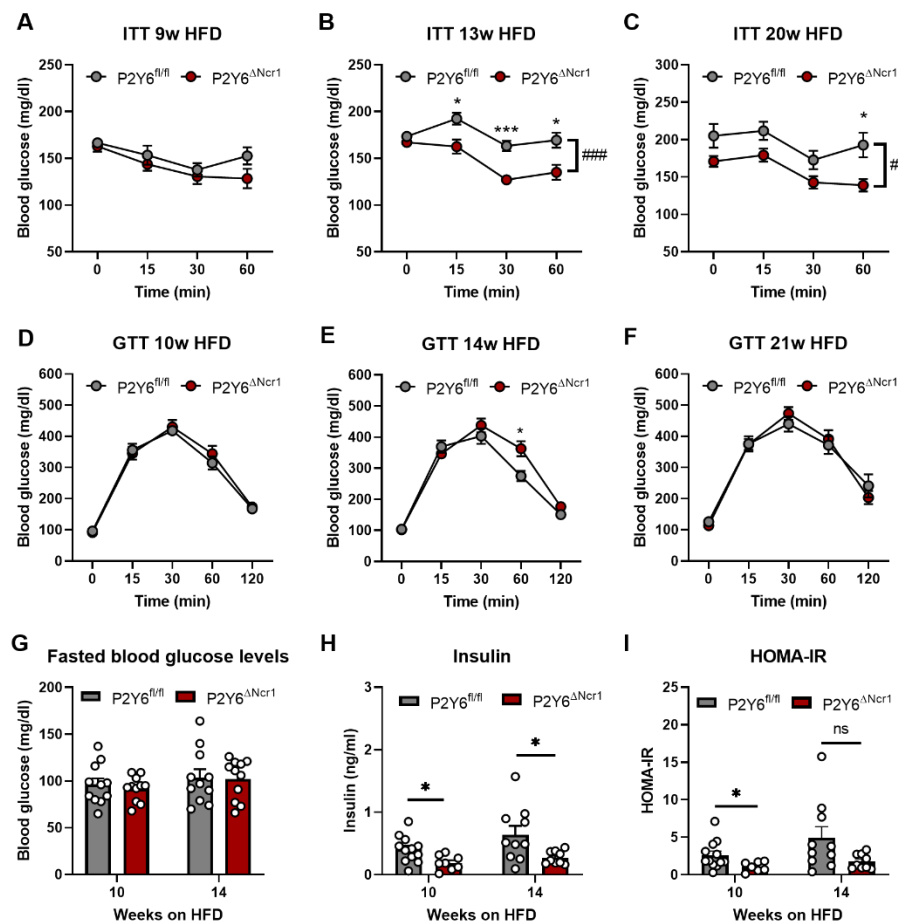

**Fig. 2: P2Y6R signaling in natural killer cells impairs insulin sensitivity in HFD-fed mice.**

(A-C) Transgenic mice lacking P2Y6R expression in NK cells (P2Y6<sup>ΔNcr1</sup>, n=11) and littermate control mice (P2Y6<sup>fl/fl</sup>, n=11) on HFD for 9 weeks (A), 13 weeks (B) and 20 weeks (C) were subjected to an insulin tolerance test (ITT). (D-F) Glucose tolerance tests (GTT) were performed in P2Y6<sup>fl/fl</sup> (n=11) and P2Y6<sup>ΔNcr1</sup> (n=11) after 10 weeks (D), 14 weeks (E) and 21 weeks (F) on HFD. (G) Blood glucose levels after 16 hour-fasting in P2Y6<sup>fl/fl</sup> (n=11) and P2Y6<sup>ΔNcr1</sup> (n=11) mice after 10 and 14 weeks on HFD. (H) Plasma insulin levels of P2Y6<sup>fl/fl</sup> (n=10-12) and P2Y6<sup>ΔNcr1</sup> (n=8-9) mice fed a HFD for 14 weeks and fasted for 16 hours were analyzed by ELISA. (I) Homeostasis Model Assessment (HOMA) Index for insulin resistance (IR) was determined for P2Y6<sup>fl/fl</sup> (n=10-12) and P2Y6<sup>ΔNcr1</sup> (n=7-9) mice after 10 and 14 weeks on HFD. Statistics: (A-F) Two-way RM ANOVA with Sidak's multiple comparison test, \*p<0.05, \*\*p<0.01, \*\*\*p<0.001; genotype: #p<0.05, ###p<0.001. Error bars represent SEM. (G-I) Unpaired two-tailed t-test, \*p<0.05. Data are represented as mean ± SEM. ○ denotes individual mice.



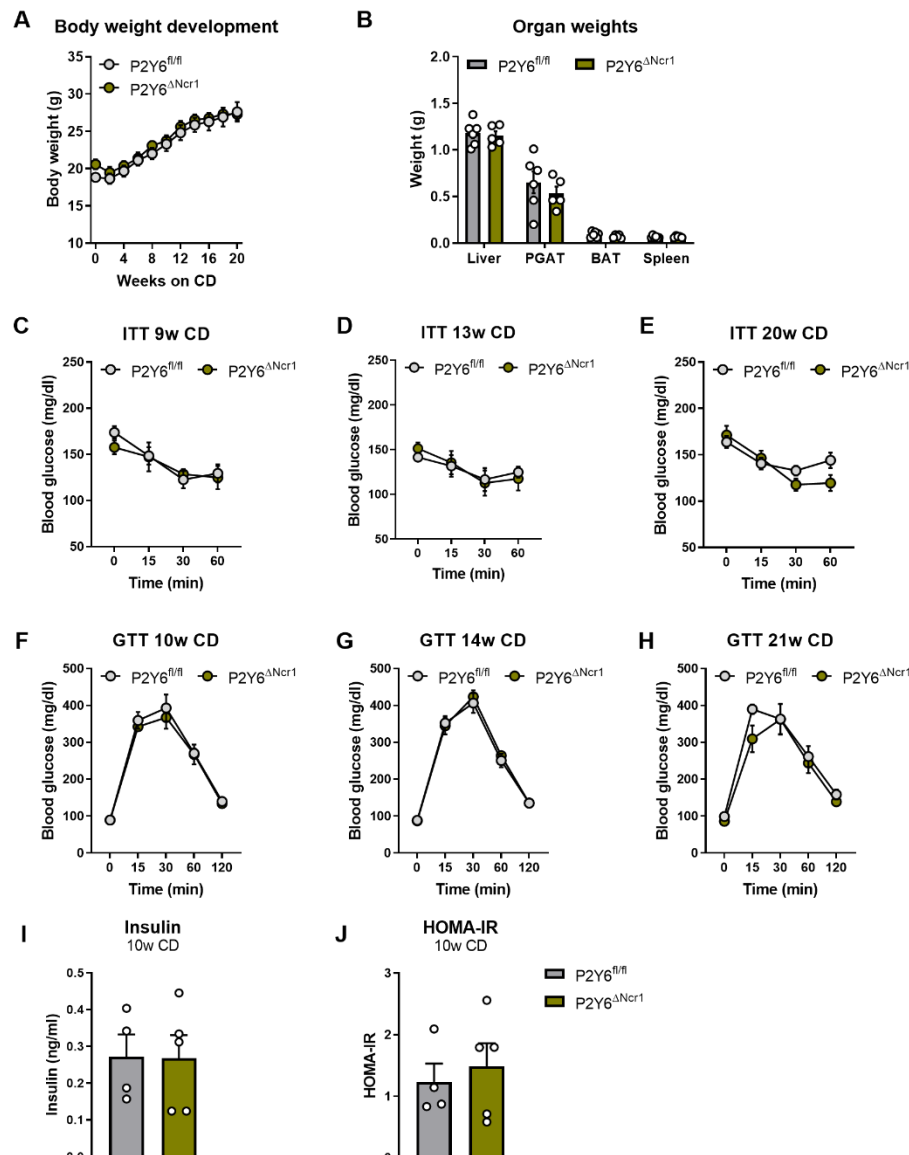

**Fig. S5: P2Y6R deletion in NK cells of control diet-fed mice does not improve insulin sensitivity.** (A) Body weight development in control diet-fed male mice (P2Y6<sup>fl/fl</sup>, n=6; P2Y6<sup>ΔNcr1</sup>, n=5). (B) Organ weights after 21 weeks of CD-feeding (P2Y6<sup>fl/fl</sup>, n=6; P2Y6<sup>ΔNcr1</sup>, n=5). (C-E) Transgenic mice lacking P2Y6R expression in NK cells (P2Y6<sup>ΔNcr1</sup>, n=5) and littermate control mice (P2Y6<sup>fl/fl</sup>, n=6) fed a CD for 9 weeks (C), 13 weeks (D) and 20 weeks (E) were subjected to an insulin tolerance test (ITT). (F-H) Glucose tolerance tests (GTT) were performed in P2Y6<sup>fl/fl</sup> (n=6) and P2Y6<sup>ΔNcr1</sup> (n=5) after 10 weeks (F), 14 weeks (G) and 21 weeks (H) on CD. (I) Plasma insulin levels of P2Y6<sup>fl/fl</sup> (n=4) and P2Y6<sup>ΔNcr1</sup> (n=6) mice fed a CD for 10 weeks and fasted for 16 hours were analyzed by ELISA. (J) Homeostasis Model Assessment (HOMA) Index for insulin resistance (IR) was determined for P2Y6<sup>fl/fl</sup> (n=4) and P2Y6<sup>ΔNcr1</sup> (n=6) mice after 10 weeks on CD. Statistics: (A, C-H) Two-way RM ANOVA with Sidak's multiple comparison test. (B, I-J) Unpaired two-tailed t-test. Data are represented as mean ± SEM. ○ denotes individual mice.

## **NK cell-specific deletion of P2Y6R improves insulin-induced suppression of hepatic glucose production in obesity**

To further dissect tissue-specific effects of P2Y6R signaling in NK cells on insulin sensitivity and glucose homeostasis, we performed hyperinsulinemic-euglycemic clamp studies in HFD-fed P2Y6<sup>ΔNcr1</sup> mice and their littermate controls. Mice with NK cell-specific depletion of the P2Y6R required significantly higher glucose infusion rates (GIR) compared to their littermate controls (Fig. 3A) in order to maintain euglycemic blood glucose levels during the steady state of the clamp experiment (Fig. 3B), while exhibiting comparable levels of circulating human insulin concentrations (Fig. 3C). Quantitative assessment of insulin's ability to suppress gluconeogenesis in both groups of mice revealed that P2Y6<sup>ΔNcr1</sup> mice exhibited a clear improvement in insulin's ability to suppress hepatic glucose production (HGP) (Fig. 3D). Since hepatic glucose production is controlled both through insulin-induced changes in the expression of key enzymes of gluconeogenesis as well as through gluconeogenic substrate availability, such as fatty acids released from adipose tissue through lipolysis, we next compared the ability of insulin to regulate the concentration of plasma free fatty acid (FFA) concentrations during the clamp phase. This analysis revealed that while in obese HFD-fed control mice insulin failed to suppress circulating plasma FFA concentrations during the clamp, insulin significantly reduced circulating FFA concentrations in P2Y6<sup>ΔNcr1</sup> mice (Fig. 3E).

Lipolysis is exceptionally sensitive to the action of insulin (Jensen and Nielsen, 2007) and tightly regulated by the phosphorylation of hormone sensitive lipase (HSL) in adipose tissue (Nielsen *et al.*, 2014). We found that insulin inhibits the phosphorylation of HSL at serine 563 in P2Y6<sup>ΔNcr1</sup> mice (Fig. 3F), which is a main phosphorylation site known to regulate HSL-driven lipolysis (Nielsen *et al.*, 2014), while phosphorylation of serine 565 only showed a mild increase in P2Y6<sup>ΔNcr1</sup> mice (Fig. 3F).

However, in contrast to an enhanced ability of insulin to suppress HGP and adipose tissue lipolysis, insulin-stimulated uptake of [<sup>14</sup>C]-D-glucose into perigonadal adipose tissue (PGAT), brown adipose tissue (BAT), brain, and skeletal muscle (SKM) remained unaltered in P2Y6<sup>ΔNcr1</sup> mice compared to their controls (Fig. 3G). Consistent with unaltered insulin-stimulated glucose uptake in these organs, also assessment of insulin-stimulated protein kinase B (AKT) phosphorylation during the clamp failed to reveal significant differences in P2Y6<sup>ΔNcr1</sup> mice compared to their controls (Fig. 4). Moreover, insulin's ability to activate AKT phosphorylation in liver did not differ between

260 the two groups of animals (Fig. 4). Thus, deletion of P2Y6R from NK-cells in obesity  
261 appears to enhance insulin-stimulated suppression of lipolysis in PGAT and thus  
262 gluconeogenic substrate supply to liver.

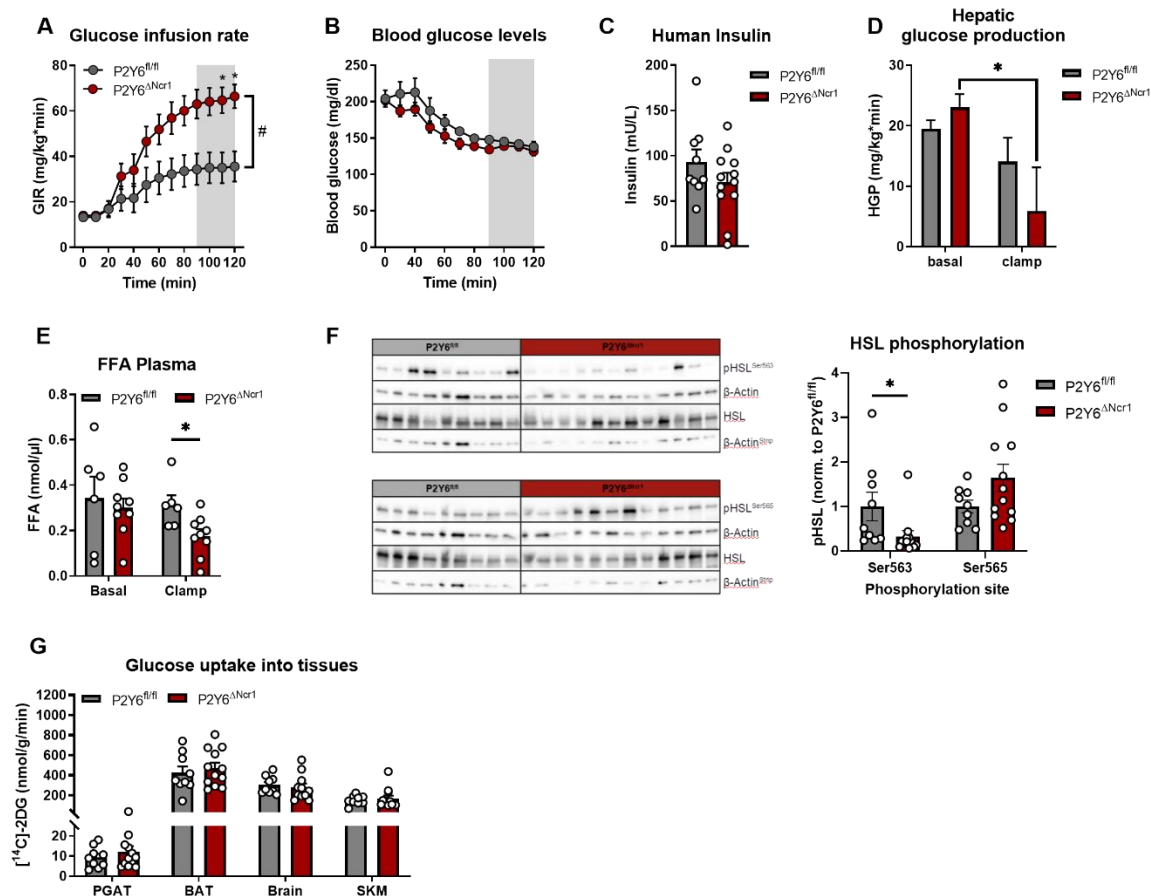

**Fig. 3: P2Y6R deletion in NK cells reduces hepatic glucose production and lipolysis in adipose tissue.** Transgenic mice lacking P2Y6R expression in NK cells (P2Y6<sup>ΔNcr1</sup>, n=12) and littermate control mice (P2Y6<sup>fl/fl</sup>, n=9) were subjected to HFD feeding for 9 weeks. (A and B) Hyperinsulinemic-euglycemic clamp study (A) Glucose-infusion rate (GIR) required to reach euglycemic steady state glucose levels (90-120 min). (B) Blood glucose levels, monitored every 10 min during the experiment, reached euglycemic steady state levels at the end of the experiment. (C) Human insulin levels in plasma during the clamped state were determined by ELISA (P2Y6<sup>fl/fl</sup>, n=9; P2Y6<sup>ΔNcr1</sup>, n=12). (D) Hepatic glucose production (HGP) (P2Y6<sup>fl/fl</sup>, n=8; P2Y6<sup>ΔNcr1</sup>, n=9) and (E) free fatty acid (FFA) concentration in plasma (P2Y6<sup>fl/fl</sup>, n=6; P2Y6<sup>ΔNcr1</sup>, n=9) were determined at the basal and clamped state. (F) Organs of clamped P2Y6<sup>fl/fl</sup> (n=9) and P2Y6<sup>ΔNcr1</sup> (n=12) mice on HFD (9 weeks) were further investigated by western blot analysis. Representative immuno-blots for phosphorylated hormone-sensitive lipase (HSL) at Ser563 and at Ser565, total HSL and β-Actin in PGAT of clamped mice. Quantification of pHSL<sup>Ser563</sup> and pHSL<sup>Ser565</sup> levels was performed after normalization to β-Actin and total HSL levels. (G) Organ-specific glucose uptake rates during the clamped state in P2Y6<sup>fl/fl</sup> (n=9) and P2Y6<sup>ΔNcr1</sup> (n=12) mice. Statistics: (A) Two-way RM ANOVA with Sidak's multiple comparison test. \*p≤ 0.05, #p (Genotype) ≤ 0.05. (B) Two-way RM ANOVA with Sidak's multiple comparison test for steady state (90-120 min) p=0.2598. (C-H) Unpaired two-tailed t-test, \*p≤0.05. Data are represented as mean ± SEM. ○ denotes individual mice.

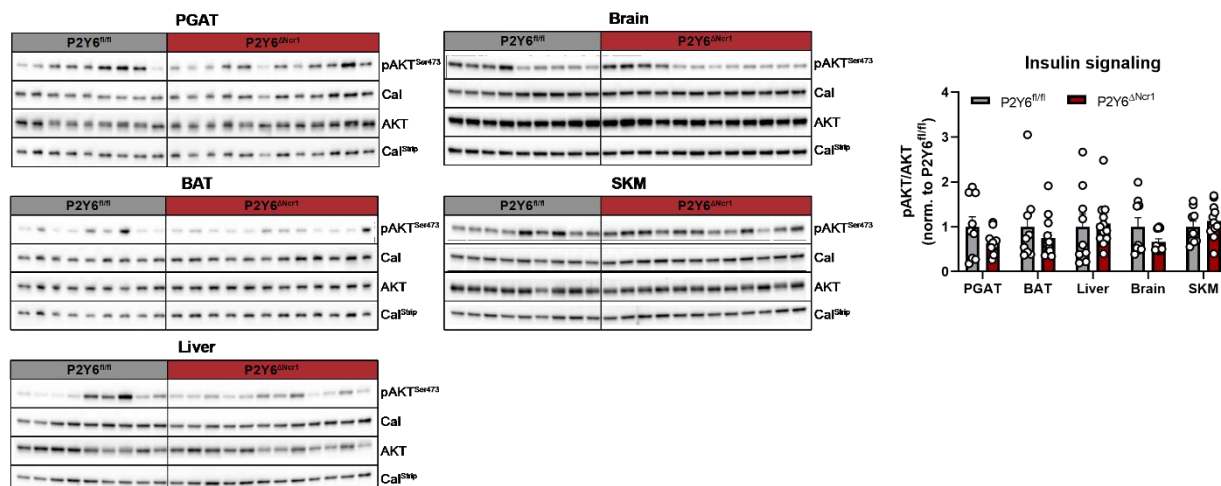

**Fig. 4: NK cell-specific deletion of P2Y6R does not alter insulin signaling in peripheral organs.** Organs of clamped *P2Y6<sup>fl/fl</sup>* (n=9) and *P2Y6<sup>ΔNcr1</sup>* (n=12) mice on HFD (9 weeks) were further investigated by western blot analysis. Representative immuno-blots for phosphorylated AKT (Ser473), total AKT and Calnexin in PGAT, BAT, liver, brain and SKM of clamped mice. Quantification of pAKT<sup>Ser473</sup> levels was performed after normalization to Calnexin and total AKT as loading controls. Statistics: Unpaired two-tailed t-test, \*p≤0.05. Data are represented as mean ± SEM. ○ denotes individual mice.

## NK cell-specific deletion of P2Y6R upregulates genes associated with triglyceride homeostasis and increases mitochondrial function in liver

To further investigate the effects of NK cell-specific P2Y6R signaling on liver and adipose tissue, we compared gene expression profiles of liver and PGAT from *P2Y6<sup>ΔNcr1</sup>* and their control littermates on HFD by mRNA deep sequencing. Differential gene expression analysis (DESeq2) identified 166 differentially expressed genes in liver and 58 genes in PGAT of *P2Y6<sup>ΔNcr1</sup>* mice compared to their controls (Fig. 5A). To gain more functional insights based on the gene expression patterns, we subjected significantly regulated genes (cutoff p≤0.05) to gene set enrichment analyses. The three most significantly regulated gene ontologies in liver identified pathways of acylglycerol homeostasis, triglyceride homeostasis and oxidative phosphorylation (Fig. 5B), gene set enrichment analysis for regulated genes in PGAT did not yield any metabolism-related gene ontology terms (data not shown). Here, expression of lipoprotein lipase (*Lpl*), a marker gene of the GO terms for acylglycerol and triglyceride homeostasis, was shown to be specifically up-regulated in liver of *P2Y6<sup>ΔNcr1</sup>* mice compared to controls, but not in PGAT (Fig 5C). In contrast, *Plin2* expression was significantly down-regulated in PGAT and showed a mild decrease in expression in liver (Fig. 5D).

283 Interestingly, analysis of the overlap of commonly regulated genes in liver and  
284 PGAT revealed that 10 genes (*Lilra5*, *Rora*, *Herc1*, *Bnip2*, *Lactb*, *Ciao2a*, *Rps27l*, *Ice2*,  
285 *Anxa2*, *Vps13c*) were similarly differentially expressed in both organs (Suppl. Fig. S6).  
286 Importantly, some of them are known to be specifically expressed in immune cells and  
287 NK cells, thus raising the possibility that some of the commonly observed differences  
288 in both tissues might result from their coordinated expression changes in tissue-  
289 infiltrating NK cells. Here, only *Lilra5* expression was found to be up-regulated,  
290 whereas the expression of *Rora* and *Herc1* was down-regulated (Suppl. Fig. S6).  
291 These findings were further validated by real-time PCR analysis. Consistent with the  
292 results obtained in the mRNA sequencing experiment, *Rora* expression was  
293 significantly down-regulated in liver and PGAT of P2Y6<sup>ΔNcr1</sup> mice compared to the  
294 expression in littermate controls (Fig. 5E) and *Lilra5* expression was confirmed to be  
295 up-regulated in both organs of P2Y6R knock out mice (Fig. 5F).

296 As triglyceride (TG) homeostasis was affected by NK cell-specific deletion of  
297 P2Y6R, we conducted lipidomic analyses of liver samples from mice fed a HFD for 9  
298 weeks. These analyses revealed no significant overall changes in hepatic TG (Fig. 5G)  
299 and diacylglyceride (DAG) contents (Fig. 5H), however some specific lipid species  
300 showed a trend towards reduction in liver of P2Y6<sup>ΔNcr1</sup> compared to controls (C16:0,  
301 C18:0 TGs, C16:0-C18:1, C18:1-C18:1 DAGs).

302 Since hepatic lipid homeostasis is closely linked to mitochondrial function in liver,  
303 we next investigated the rates of oxidative capacity and extracellular acidification rates  
304 (ECAR) in micro-punches from liver of HFD-fed P2Y6<sup>ΔNcr1</sup> mice and their control  
305 littermates. This analysis revealed a significant upregulation of the ECAR (Fig. 5I),  
306 indicating an increase in glycolysis, while the oxygen consumption rate (OCR) was  
307 only slightly but not significantly improved in liver of HFD-fed P2Y6<sup>ΔNcr1</sup> mice compared  
308 to their control littermates (Fig. 5I).

309 Collectively, NK cell-specific P2Y6R signaling appears to affect triglyceride  
310 metabolism and mitochondrial function in liver, while coordinately regulated differences  
311 in gene expression between liver and adipose tissue possibly arise from NK cell  
312 intrinsic changes in gene expression in tissue-infiltrating NK cells.

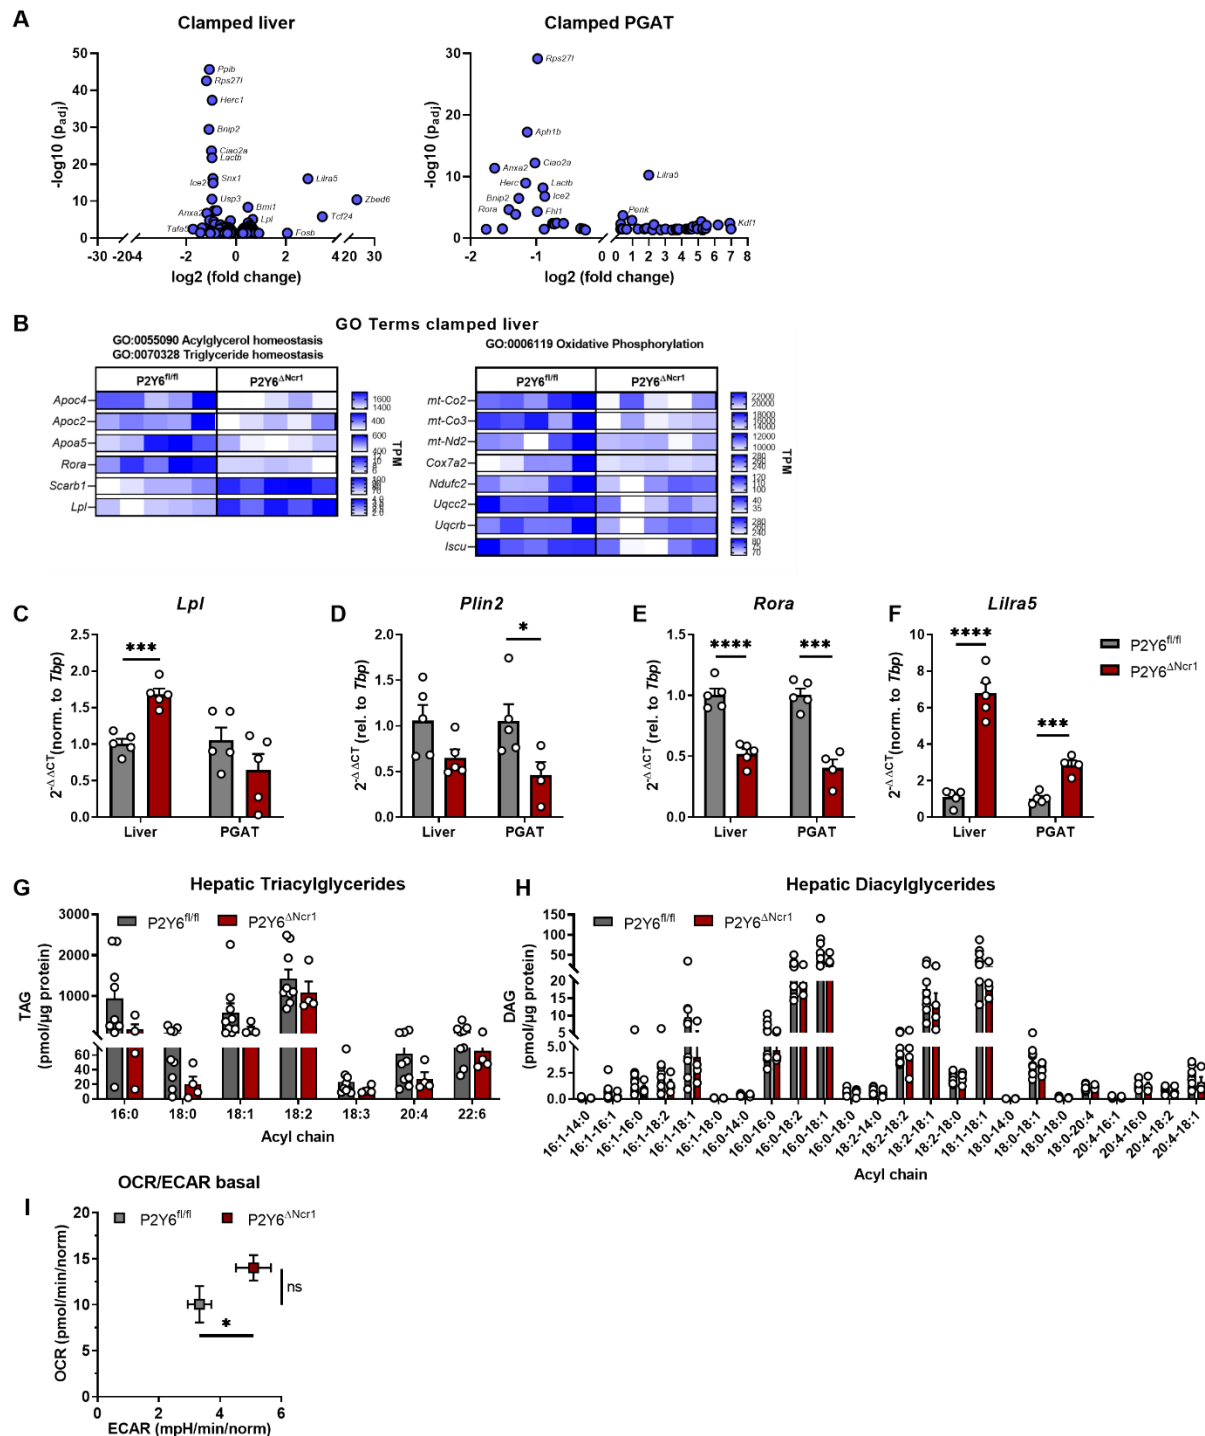

**Fig. 5: NK cell-specific deletion of P2Y6R upregulates genes associated with triglyceride homeostasis and increases mitochondrial function in liver.** (A) Differentially expressed genes in liver (left) and PGAT (right) of clamped P2Y6<sup>fl/fl</sup> (n=5) versus P2Y6<sup>ΔNcr1</sup> (n=5) mice on HFD (9 weeks). (B) Gene set enrichment analysis of transcriptomes in livers of clamped P2Y6<sup>fl/fl</sup> (n=5) versus P2Y6<sup>ΔNcr1</sup> (n=5) mice. Shown are the most significantly enriched gene ontology terms (GO terms) with the transcripts per million (TPM) for the GO term defining marker genes. (C-F) Validation of the RNASeq data by real-time PCR analysis. Expression of lipoprotein lipase (*Lpl*), RAR-related orphan receptor alpha (*Rora*), Perilipin 2 (*Plin2*) and Leukocyte immunoglobulin-like receptor subfamily A member 5 (*Lilra5*) was quantified in clamped liver and PGAT of P2Y6<sup>fl/fl</sup> (n=5) and P2Y6<sup>ΔNcr1</sup> (n=5) mice. Quantification was determined by the 2<sup>-ΔΔCt</sup> method using the housekeeping gene TATA-binding protein



(*Tbp*) for normalization. (G-H) Lipidomic analysis of livers from P2Y6<sup>fl/fl</sup> (n=8) and P2Y6<sup>ΔNcr1</sup> (n=4) mice on HFD (9 weeks). (I) Seahorse analysis in liver punches of P2Y6<sup>fl/fl</sup> (n=5) and P2Y6<sup>ΔNcr1</sup> (n=4) mice on HFD (9 weeks). Baseline oxygen consumption rate (OCR) as measure for respiration was plotted against the extracellular acidification rate (ECAR) as measure for glycolysis. Statistics: (C-I) Unpaired two-tailed t-test, \*p≤0.05, \*\*p≤0.01, \*\*\*p≤0.001, \*\*\*\*p≤0.0001. Data are represented as mean ± SEM. ○ denotes individual mice.

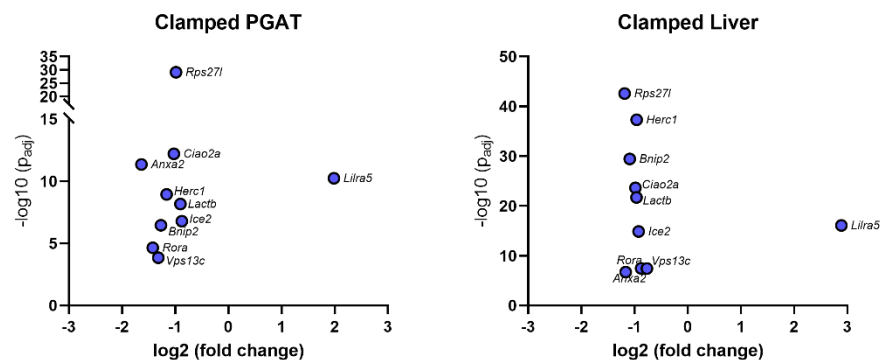

**Fig. S6: Overlap analysis of differentially expressed genes in clamped PGAT and liver reveal a NK cell-specific gene set.** Differentially expressed genes (p≤0.05) in clamped PGAT and liver were compared and overlapping genes plotted as volcano plots.

# **NK cell specific deletion of P2Y6R alters tissue-infiltration of immune cells and expression of chemokines**

NK cells represent a heterogeneous innate lymphocyte cell population with organ- and microenvironment-specific expression of cytotoxic molecules, receptors and transcription factors (Crinier *et al.*, 2018; Zhao *et al.*, 2020). As the overlap analysis of the transcriptional changes from adipose tissue and liver revealed a common set of regulated, possibly immune cell-specific genes, we next assessed the transcriptome of isolated NK cells. To this end, NK cells were isolated from adipose tissue and liver of HFD-fed P2Y6<sup>ΔNcr1</sup> and P2Y6<sup>fl/fl</sup> mice by flow cytometry cell sorting based on the expression of the NK cell-specific surface markers NK1.1 and Ncr1 (Suppl. Fig. S7). DESeq2 analysis of the transcriptome of bulk-sequenced NK cells resulted in 59 differentially expressed genes in adipose tissue-derived NK cells (Fig. 6A) and 78 genes in hepatic NK cells (Fig. 6B). Gene set enrichment analyses of the differentially expressed genes (cutoff p≤0.05) in adipose tissue-derived NK cells identified pathways of lymphocyte chemotaxis, lymphocyte migration and neutrophil migration (Fig. 6C),



whereas pathways of protein folding, and chaperone cofactor-dependent protein folding were detected in liver-derived NK cells (Fig. 6D).

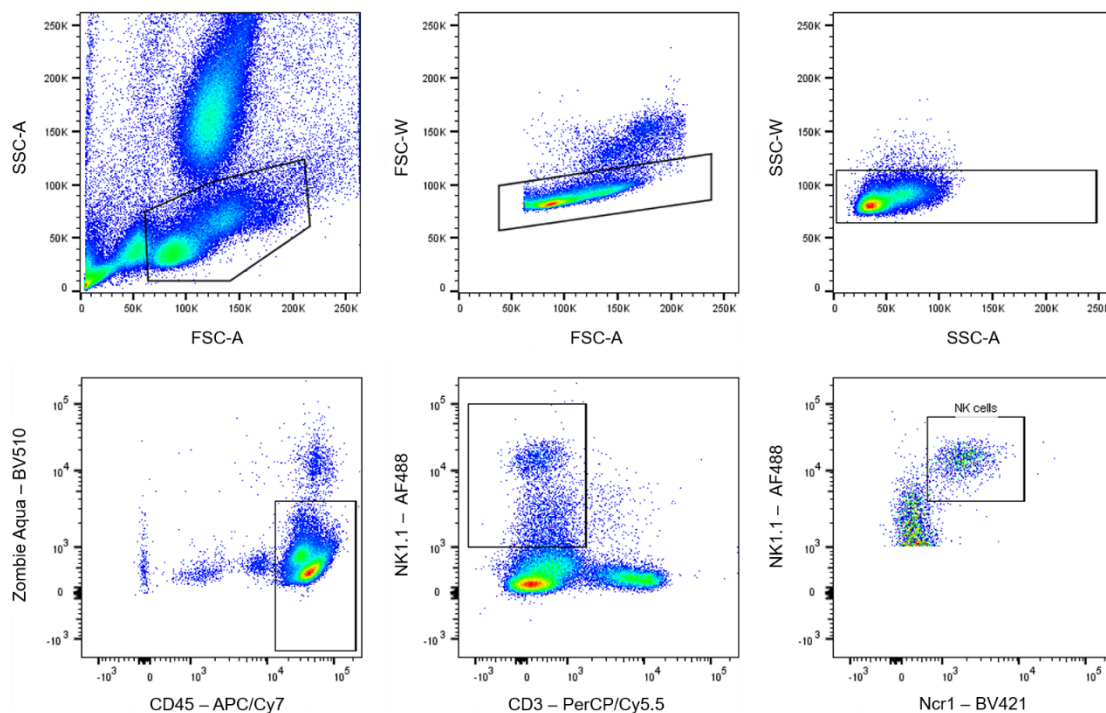

**Fig. S7: NK cells were sorted from liver, PGAT and spleen of male mice on HFD by flow cytometry.** NK cells were gated as single/viable/CD45<sup>+</sup>/CD3<sup>+</sup>/NK1.1<sup>+</sup>/Ncr1<sup>+</sup> cells.

334

Consistent with our previous findings in liver and adipose tissue, we also found genes of the presumably NK cell-specific gene set to be differentially expressed in isolated NK cells of both tissue origins (Fig. 6E). This supports our hypothesis that similar differences in gene expression between liver and adipose tissue possibly arise from NK cell intrinsic changes in gene expression of tissue-infiltrating NK cells. Besides this first NK cell-specific gene set, we found a second set of overlapping genes in isolated NK cells derived from adipose tissue and liver. This gene set includes the up-regulated genes *Trip4*, *Stip1*, *Gtf2a2* and *Hsph1* and the down-regulated genes *Rab8b*, *Usp3*, *Ppib*, *F2rl3* and *Snx1* (Fig. 6F). *Usp3*, *Ppib* and *Snx1* have also been found to be differentially expressed in liver and *Rab8b* in adipose tissue of clamped P2Y6<sup>ΔNcr1</sup> mice when compared to their littermate controls (data not shown).

Notably, in adipose tissue-derived NK cells the gene expression of the chemokines *Ccl3*, *Ccl4*, *Xcl1* and *Cxcl16* (Fig. 6G) was found to be down-regulated in parallel with the down-regulation of *Csf1* expression in hepatic NK cells (Fig. 6B). As these chemokines are involved in the recruitment and activation of immune cells, we aimed to elucidate the impact of this P2Y6R-dependent and NK cell-specific down-

351 regulation on the infiltration of immune cells into different organs. In line with this  
 352 reduced expression of chemokines in NK cells, we observed a significant reduction of  
 353 NK cell numbers in liver and spleen, a decrease in NKT cell numbers in PGAT and a  
 354 reduction of macrophages in spleen of P2Y6<sup>ΔNcr1</sup> mice compared to control (Fig. 7A).  
 355 In addition, infiltration of MAC2 positive macrophages into adipose tissue was reduced  
 356 in mice with NK cell-specific P2Y6R deletion after prolonged HFD-feeding (Suppl. Fig.  
 357 S8A), concomitant with a mild but non-significant reduction in the expression of  
 358 inflammatory cytokines and chemokines (Suppl. Fig. S8B). On the contrary, expression  
 359 of inflammatory markers in liver of mice fed a HFD for 22 weeks were not significantly  
 360 altered between genotypes (Suppl. Fig. S8C).

361 Depending on their maturation state, NK cells express a distinct repertoire of  
 362 cytotoxins and cytokines (Crinier *et al.*, 2018). As we observed a reduction in  
 363 chemokine expression in P2Y6<sup>ΔNcr1</sup>-derived NK cells, we investigated the impact of  
 364 P2Y6R signaling on the maturation state of NK cells based on the surface expression  
 365 of CD27 and CD11b. Quantification of the different maturation subsets of NK cells by  
 366 flow cytometry analysis revealed that the majority of NK cells in adipose tissue and  
 367 liver belong to the mature subset (CD11b<sup>+</sup>/CD27<sup>-</sup>), whereas in spleen and blood also  
 368 a notable proportion of immature (CD11b<sup>-</sup>/CD27<sup>+</sup>) and intermediate (CD11b<sup>+</sup>/CD27<sup>+</sup>)  
 369 NK cells could be found (Fig. 7B). However, abrogation of P2Y6R signaling did not  
 370 affect the overall maturation state in NK cells (Fig. 7B).

371 In summary, P2Y6R signaling in NK-cells of HFD-fed mice likely increases the  
 372 expression of chemokines favoring the infiltration of immune cells into metabolically  
 373 relevant organs, while it at the same time drives NK cell intrinsic changes in the  
 374 expression of specific gene sets that might serve as possible markers for tissue-  
 375 infiltrating NK cells.

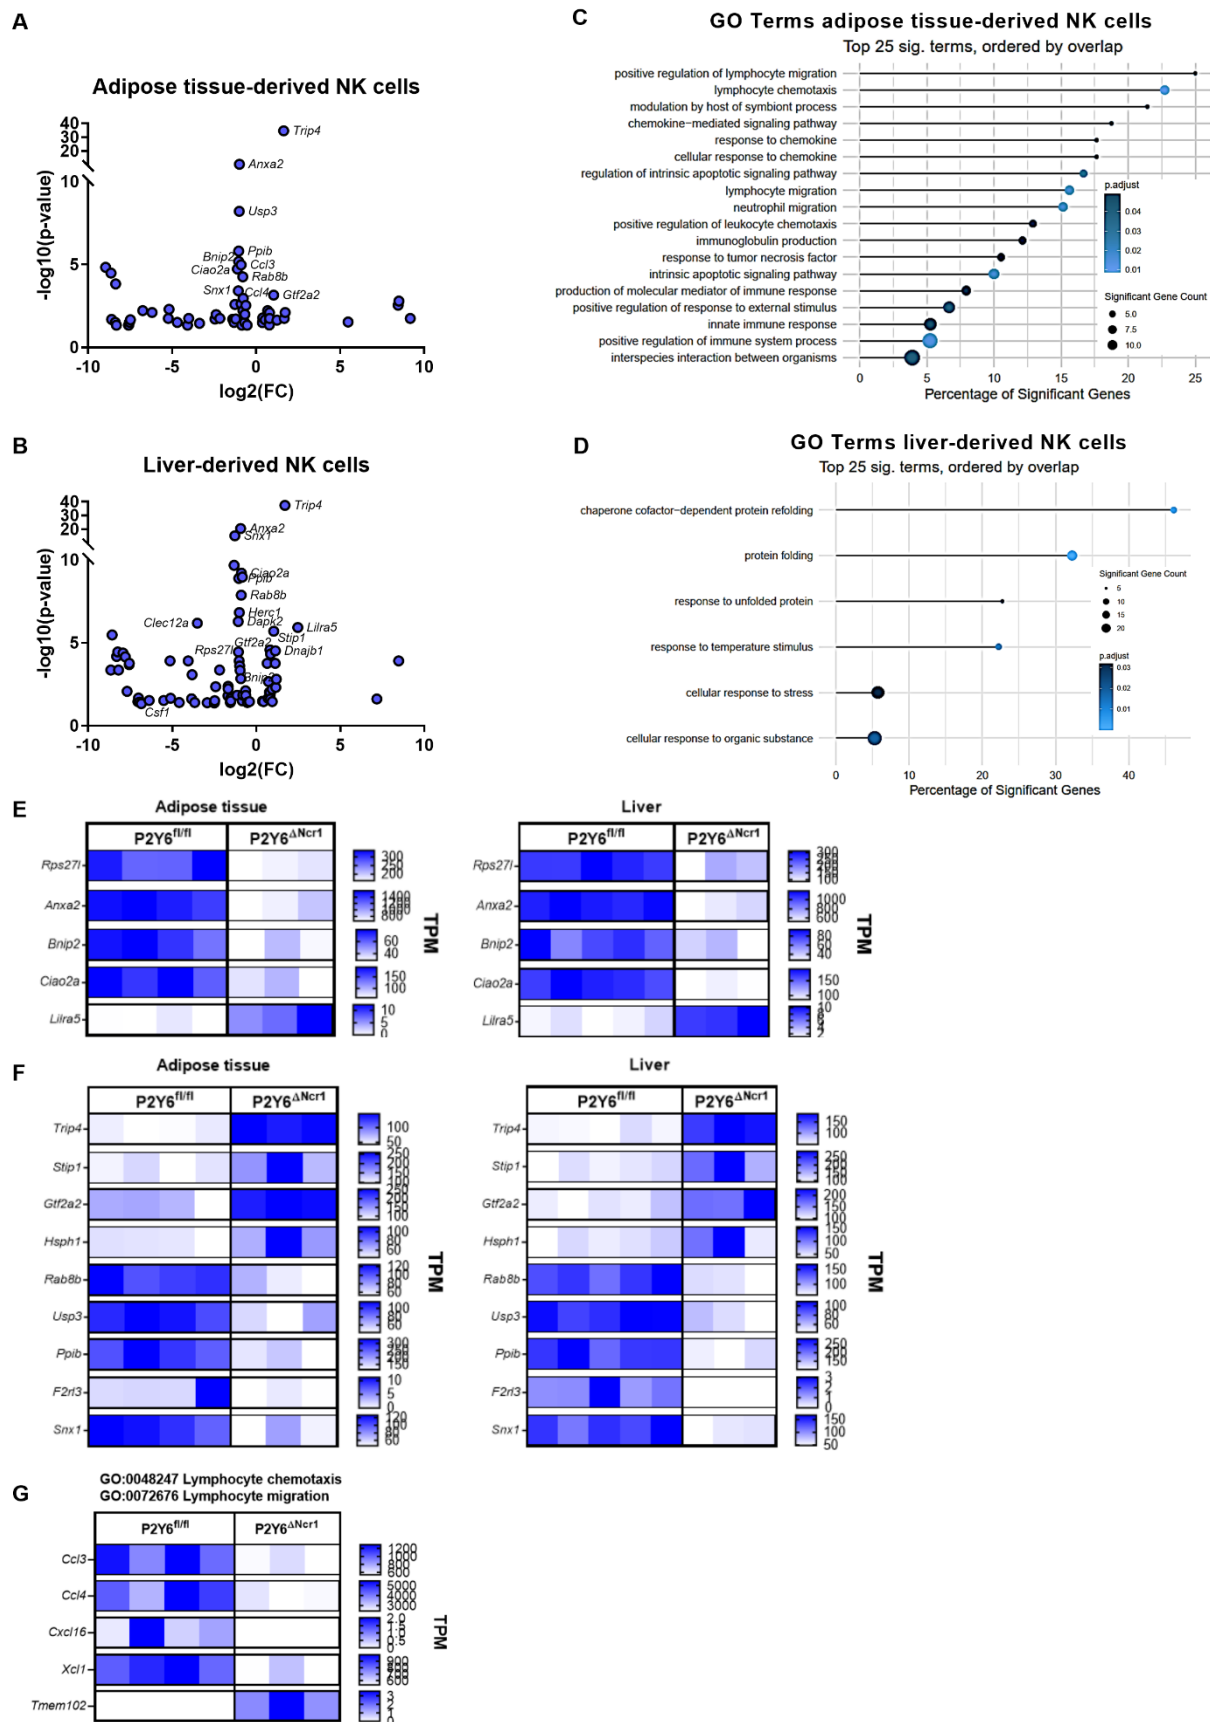

**Fig. 6: Adipose tissue-derived NK cells from P2Y6 $\Delta$ Ncr1 mice show reduced expression of chemokines. (A-B) Transcriptomic analysis of NK cells (defined as single/viable/CD45<sup>+</sup>/CD3<sup>+</sup>/NK1.1<sup>+</sup>/Ncr1<sup>+</sup> cells and sorted by flow cytometry) from adipose tissue (A) and liver (B) of P2Y6<sup>fl/fl</sup> (n=4-**

5) and P2Y6 $\Delta$ Ncr1 (n=3) mice on HFD (15 weeks). Volcano-plots of differentially expressed genes with  $p \leq 0.05$ . (C-D) GO term analysis of differentially expressed genes with  $p \leq 0.05$  in adipose tissue-derived NK cells (C) and (D) hepatic NK cells. (E) TPM plots of commonly differentially expressed genes in NK cells isolated from PGAT and from liver. These genes have also been found to be differentially expressed in liver and PGAT of clamped mice. (F) TPM plots of genes differentially expressed in NK cells from both origins, PGAT (left) and liver (right). (G) TPM plots of GO term defining genes differentially expressed in adipose tissue-derived NK cells of P2Y6 $^{fl/fl}$  (n=4) and P2Y6 $\Delta$ Ncr1 (n=3) mice.

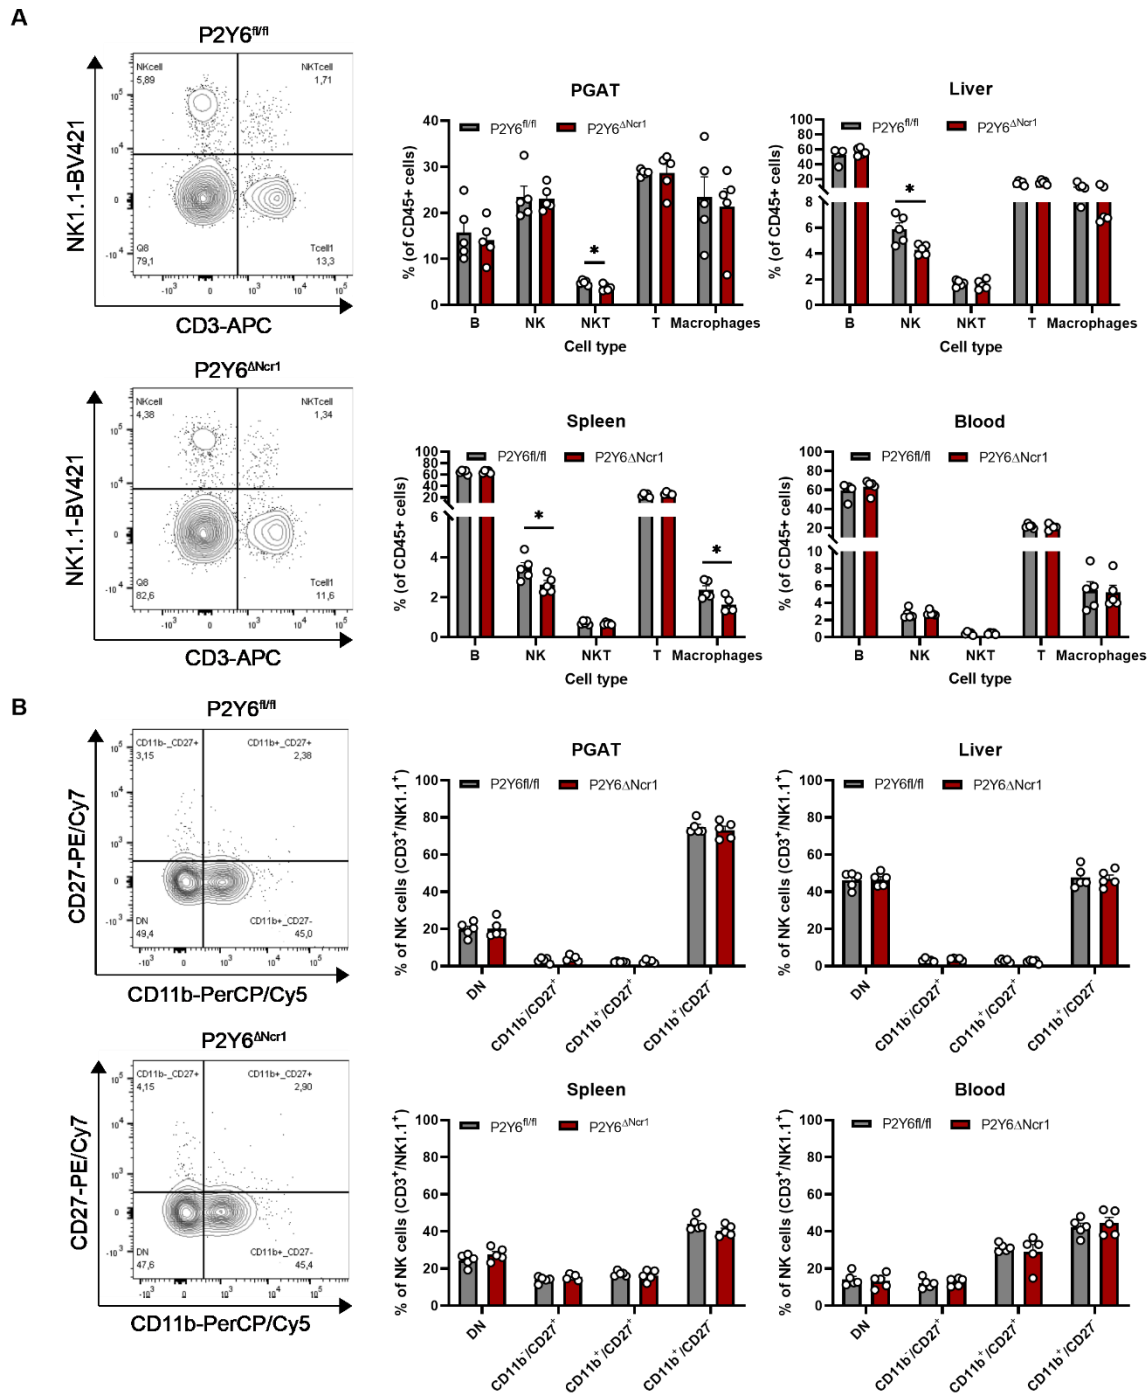

**Fig. 7: P2Y6 $\Delta$ Ncr1 mice exhibit reduced immune cell infiltration into peripheral organs.** (A) Representative flow cytometry analysis plots and quantification of immune cell subsets in PGAT, liver, spleen and blood of P2Y6 $^{fl/fl}$  (n=5) and P2Y6 $\Delta$ Ncr1 (n=5) mice fed a HFD for 14 weeks. B cells were

gated as single/viable/CD45<sup>+</sup>/CD3<sup>+</sup>/CD19<sup>+</sup> cells, NK cells as single/viable/CD45<sup>+</sup>/CD3<sup>+</sup>/NK1.1<sup>+</sup> cells, NKT cells as single/viable/CD45<sup>+</sup>/CD3<sup>+</sup>/NK1.1<sup>+</sup> cells, T cells as single/viable/CD45<sup>+</sup>/CD3<sup>+</sup>/NK1.1<sup>+</sup> cells and macrophages as single/viable/CD45<sup>+</sup>/CD11b<sup>+</sup>/F4/80<sup>+</sup> cells. **(B)** Representative FACS plots and quantification of the maturation status of NK cells in PGAT, liver, spleen and blood of P2Y6<sup>fl/fl</sup> (n=5) and P2Y6<sup>ΔNcr1</sup> (n=5) mice fed a HFD for 14 weeks. NK cells were gated as single/viable/CD45<sup>+</sup>/CD3<sup>+</sup>/NK1.1<sup>+</sup> cells and further subdivided into double negative (DN) (CD11b<sup>-</sup>/CD27<sup>-</sup>), immature (CD11b<sup>+</sup>/CD27<sup>+</sup>), intermediate (CD11b<sup>+</sup>/CD27<sup>+</sup>) and mature (CD11b<sup>+</sup>/CD27<sup>-</sup>) NK cells. Statistics: (A, B) Unpaired two-tailed t-test, \*p≤0.05. Data are represented as mean ± SEM. ○ denotes individual mice.

378

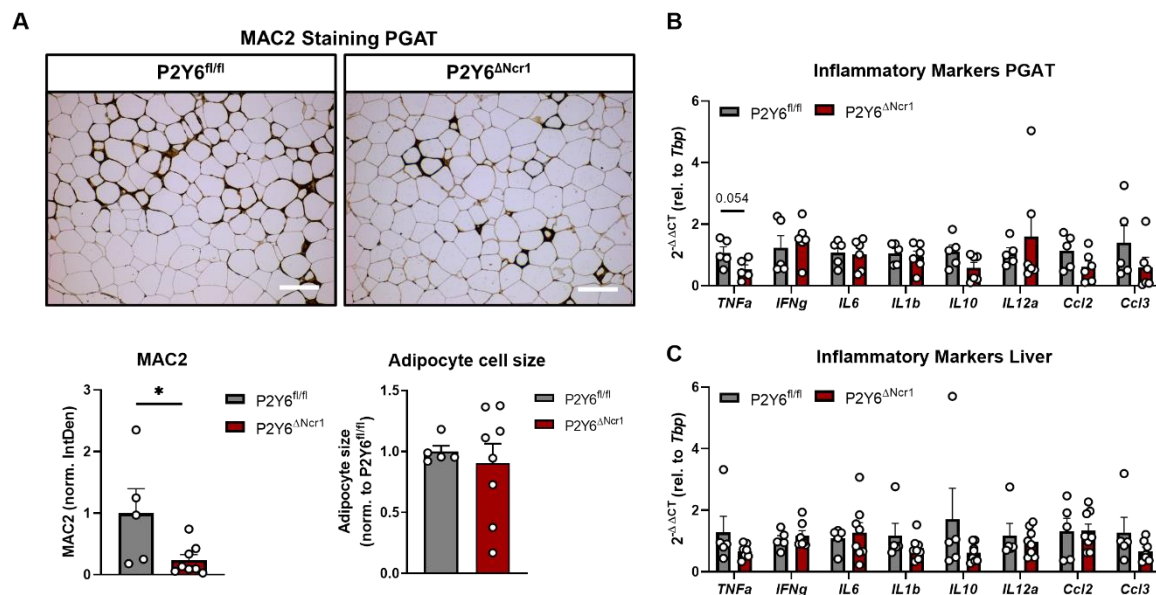

**Fig. S8: NK cell-specific deletion of P2Y6R reduces macrophage infiltration into adipose tissue in mice on HFD.** Transgenic mice (P2Y6<sup>ΔNcr1</sup>, n=8) and their control littermates (P2Y6<sup>fl/fl</sup>, n=5) were fed a HFD for 22 weeks. **(A)** Immunohistochemical analysis of MAC2 positive macrophages in PGAT of P2Y6<sup>ΔNcr1</sup> (n=8) and P2Y6<sup>fl/fl</sup> mice (n=5). Scale bars 100 μm. **(B-C)** Real-time PCR analysis of PGAT **(B)** and liver **(C)** from P2Y6<sup>ΔNcr1</sup> (n=6-8) and their control littermates (P2Y6<sup>fl/fl</sup>, n=5). Statistics: Unpaired two-tailed t-test, \*p≤0.05. Data are represented as mean ± SEM. ○ denotes individual mice.

379

## 380 Abrogation of P2Y6R-signaling in macrophages does not protect from HFD- 381 induced insulin resistance

382 Since P2Y6Rs are also expressed in macrophages (Bar *et al.*, 2008; Lattin *et al.*, 2008)  
383 where its' activation increases the expression of inflammatory (Bar *et al.*, 2008) or  
384 regulatory cytokines (Oishi *et al.*, 2016), we also investigated the role of P2Y6R  
385 signaling in macrophages in the context of obesity and the development of  
386 metaflammation-induced insulin resistance. Therefore, we crossed mice carrying a  
387 loxP-flanked P2Y6R gene (Jain *et al.*, 2020) with LysM-Cre mice (Clausen *et al.*, 1999).

388 Gene expression analysis of cultured bone marrow-derived macrophages  
389 (BMDM) isolated from control (P2Y6<sup>fl/fl</sup>) or macrophage-specific P2Y6R-deleted  
390 (P2Y6<sup>ΔLysM</sup>) mice confirmed successful and specific reduction of P2Y6R expression in



macrophages (Suppl. Fig. S9A). As obesity development is accompanied by a macrophage switch from M2- to M1-polarized macrophages in adipose tissue (Castoldi *et al.*, 2016), we aimed to elucidate the role of macrophage polarization on P2Y6R expression. Here, we found a more than three-fold upregulation of P2Y6R expression in M2-polarized compared to M1-polarized bone marrow-derived macrophages (Suppl. Fig. S9B).

We then investigated the impact of macrophage-specific P2Y6R signaling on the metabolic phenotype of HFD-fed mice. Mice with macrophage-specific deletion of P2Y6R showed the same body weight development as their control littermates (Fig. 8A) as well as no differences in body fat content (Fig. 8B). In parallel, investigations of insulin sensitivity and glucose tolerance after 10, 14 or 20 weeks of HFD-feeding did not reveal any significant differences between P2Y6<sup>ΔLysM</sup> and P2Y6<sup>fl/fl</sup> mice (Fig. 8C-H). This was in line with results from indirect calorimetry in mice fed a HFD for 18 weeks. Analyses of food intake, water consumption, energy expenditure, total activity or respiratory exchange rate (RER) did not reveal any differences between P2Y6<sup>ΔLysM</sup> and P2Y6<sup>fl/fl</sup> mice (Suppl. Fig. S9C-G). Also, insulin and leptin levels in plasma of 16 hours-fasted mice did not differ between genotypes concomitant with unaltered HOMA-IR (Fig. 8I-K).

Since UDP levels are increased in adipocytes (Suppl. Fig. S1H) where it can serve as a “find me” signal triggering macrophages to eliminate necrotic cells, such as hypertrophic and necrotic adipocytes (Cinti *et al.*, 2005), we examined the infiltration of macrophages into adipose tissue of HFD-fed mice by immunohistochemistry. However, we did not find any differences in the amount of MAC2 positive macrophages between in P2Y6<sup>ΔLysM</sup> and P2Y6<sup>fl/fl</sup> mice (Suppl. Fig. S10). In line with the overall inconspicuous phenotype of P2Y6<sup>ΔLysM</sup> mice, we also did not observe any differences in lipid accumulation in liver between genotypes (Suppl. Fig. S10).

In conclusion, we demonstrated here that P2Y6R-signaling in macrophages does not play a major role in the context of obesity-induced insulin resistance and metaflammation.

420

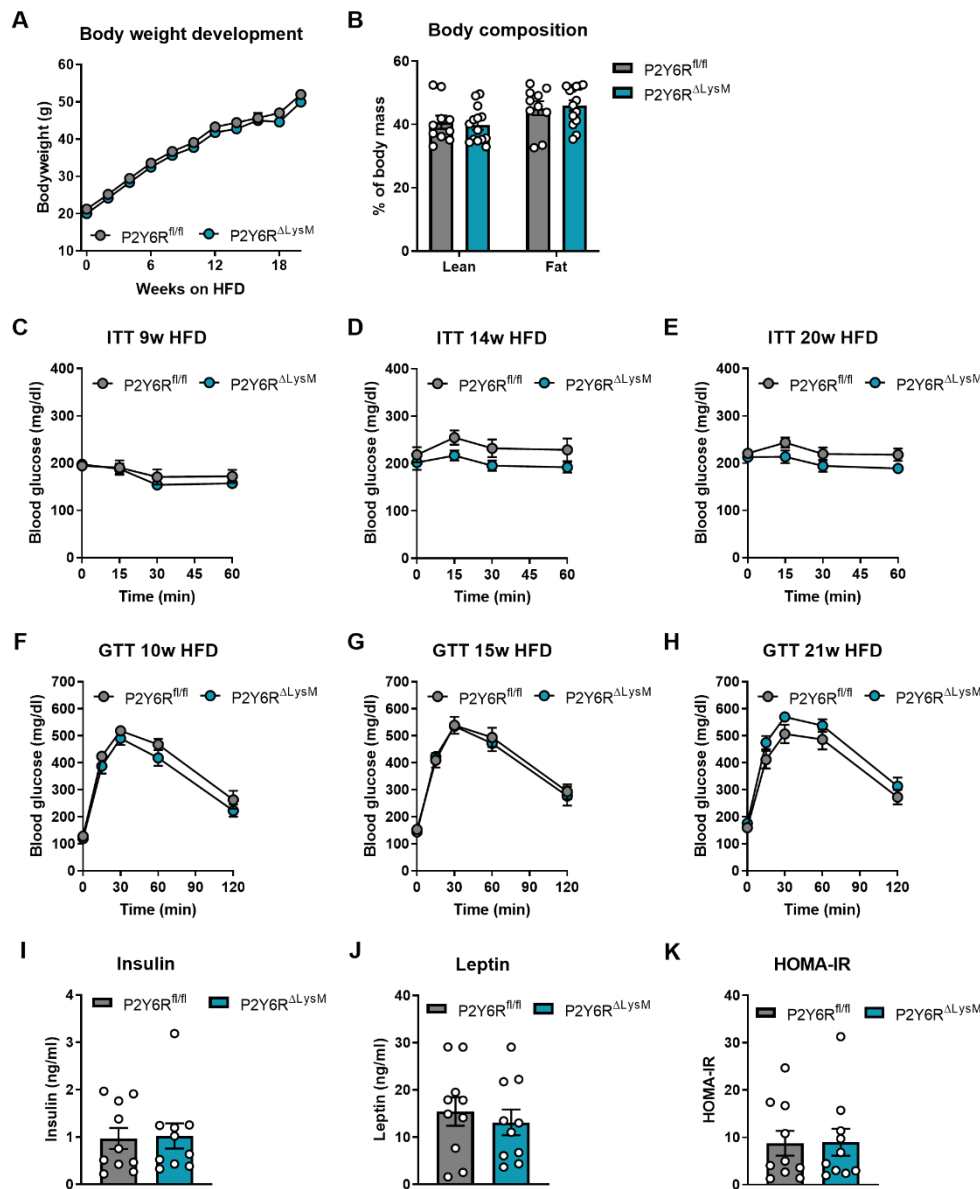

**Fig. 8: Deletion of P2Y6R in macrophages does not affect glucose metabolism in mice on HFD.**

(A) Body weight development was assessed over a period of 20 weeks in transgenic mice lacking P2Y6R expression in macrophages (P2Y6<sup>ΔLysM</sup>, n=14) and littermate control mice (P2Y6<sup>fl/fl</sup>, n=10) subjected to high-fat diet (HFD) feeding. (B) Body composition was investigated by  $\mu$ CT measurements after 19 weeks on HFD (P2Y6<sup>fl/fl</sup>, n=10; P2Y6<sup>ΔLysM</sup>, n=14). (C-E) Transgenic mice lacking P2Y6R expression in macrophages (P2Y6<sup>ΔLysM</sup>, n=14) and littermate control mice (P2Y6<sup>fl/fl</sup>, n=10) fed a HFD for 9 weeks (C), 13 weeks (D) and 20 weeks (E) were subjected to an insulin tolerance test (ITT). (F-H) Glucose tolerance tests (GTT) were performed in P2Y6<sup>fl/fl</sup> (n=10) and P2Y6<sup>ΔLysM</sup> (n=14) after 10 weeks (F), 14 weeks (G) and 21 weeks (H) on HFD. (I) Plasma insulin levels of P2Y6<sup>fl/fl</sup> (n=10) and P2Y6<sup>ΔLysM</sup> (n=10) mice fed a HFD for 10 weeks and fasted for 16 hours were analyzed by ELISA. (J) Blood leptin levels after 16 hour-fasting in P2Y6<sup>fl/fl</sup> (n=10) and P2Y6<sup>ΔLysM</sup> (n=10) mice after 10 weeks on HFD. (K) Homeostasis Model Assessment (HOMA) Index for insulin resistance (IR) was determined for P2Y6<sup>fl/fl</sup> (n=10) and P2Y6<sup>ΔLysM</sup> (n=10) mice after 10 weeks on HFD. Statistics: (A, C-H) Two-way RM ANOVA with Sidak's multiple comparison test. (B, I-K) Unpaired two-tailed t-test, \*p<0.05. Data are represented as mean  $\pm$  SEM.  $\circ$  denotes individual mice.



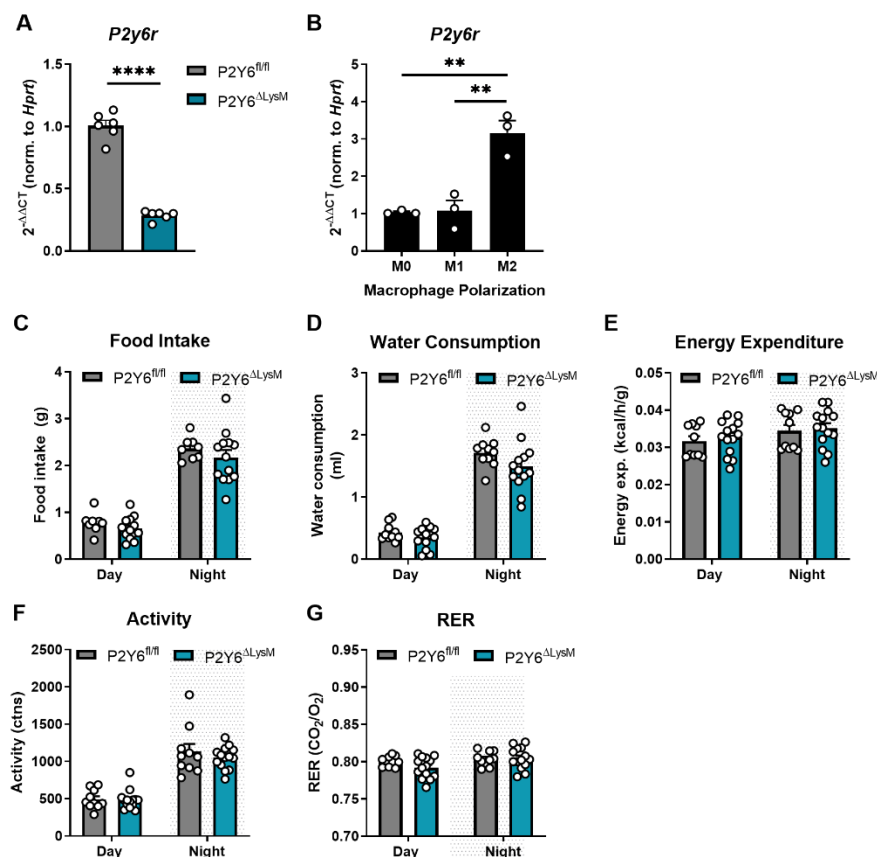

**Fig. S9: P2Y6R deletion in macrophages does not alter food intake or energy expenditure.**

(A) Bone-marrow-derived macrophages were isolated from *P2Y6<sup>fl/fl</sup>* and *P2Y6<sup>ΔLysM</sup>* mice and cultured for 7 days. *P2Y6R* expression was verified to be reduced in BMDMs of *P2Y6<sup>ΔLysM</sup>* mice (n=6) compared to control (*P2Y6<sup>fl/fl</sup>*, n=6). Data from two independent experiments. ○ denotes individual mice. (B) BMDM derived from C57Bl6 mice were cultured for 7 days and polarized into M1 or M2 macrophages. *P2Y6R* expression in M1 and M2 BMDMs was determined by real-time PCR and normalized to the expression in unpolarized (M0) BMDMs. Data pooled from three independent experiments. ○ denotes an individual experiment. (C-G) Indirect calorimetry of mice with macrophage-specific deletion of *P2Y6R* (*P2Y6<sup>ΔLysM</sup>*, n=14) and their control littermates (*P2Y6<sup>fl/fl</sup>*, n=10) after 18 weeks on HFD. ○ denotes individual mice. Statistics: (A) Unpaired two-tailed t-test. \*\*\*\*p < 0.0001 (B) Two-way RM ANOVA with Sidak's multiple comparison test. \*\*p < 0.01; (C-G) Unpaired two-tailed student's t-test. Data are represented as mean ± SEM.

421

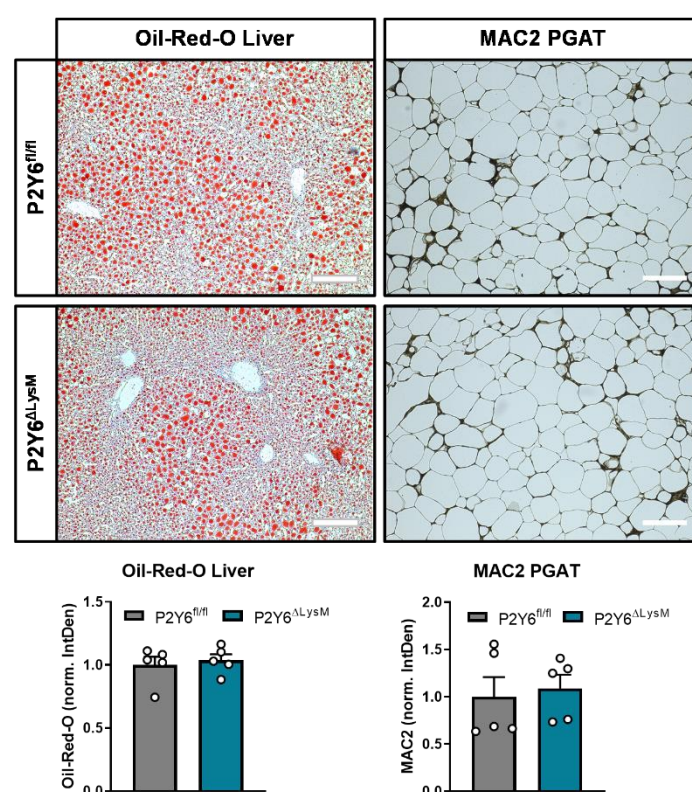

**Fig. S10: P2Y6R signaling in macrophages does not affect metaflammation in PGAT of mice on HFD.** Transgenic mice (P2Y6<sup>ΔLysM</sup>, n=5) and their control littermates (P2Y6<sup>fl/fl</sup>, n=5) were fed a HFD for 22 weeks. **(left)** Oil-Red-O staining of liver tissue. Scale bars 100 μm. **(right)** Immunohistochemical analysis of MAC2 positive macrophages in PGAT. Scale bars 100 μm. Statistics: Unpaired two-tailed t-test. Data are represented as mean ± SEM. ○ denotes individual mice.

422

## Discussion

Obesity and its' co-morbidities are often associated with a chronic low-grade inflammation, termed "metaflammation", characterized by increased levels of inflammatory cytokines in serum and infiltration of immune cells into adipose tissue. One immune cell type gaining increasing attention in the context of obesity and glucose metabolism are natural killer cells, a type of innate lymphoid cell (ILC) responsible for surveillance and extinction of virus-infected and tumor cells. In a previous study we reported that P2Y6R expression is up-regulated in NK cells derived from PGAT of HFD-fed mice (Theurich *et al.*, 2017). P2Y6R-signaling has been reported to modulate the production of pro-inflammatory cytokines and chemotaxis of immune cells (Chen *et al.*, 2014) and to be a relevant regulator of food intake and glucose metabolism in obesity (Steculorum *et al.*, 2015; Steculorum *et al.*, 2017).

Here, we demonstrated that UDP and uridine levels are elevated upon HFD feeding. The increase of UDP levels in plasma, adipocytes and adipose tissue-derived SVF after 12 weeks of HFD-feeding coincidences with the development of insulin resistance in wildtype mice. Mice with a NK cell-specific abrogation of P2Y6R signaling were protected from this diet-induced insulin resistance and showed a reduction in the expression of pro-inflammatory chemo- and cytokines in adipose tissue-derived NK cells. NK cells in adipose tissue have been found to induce the infiltration of macrophages mainly by an increased production and release of IFN $\gamma$  (Wensveen *et al.*, 2015), primarily explaining why genetic depletion of NK cells improves adipose tissue inflammation and insulin resistance (Lee *et al.*, 2016). As we did not observe any alterations in the numbers of NK cells but of macrophages and NKT cells in adipose tissue upon NK cell-specific P2Y6R deletion, we rather postulated that the observed reduction in adipose tissue inflammation and associated improvement in insulin sensitivity might be due to a reduced release of inflammatory cytokines from NK cells. And indeed, we found that adipose tissue-derived NK cells showed a decreased gene expression of inflammatory molecules such as *Ccl3*, *Ccl4*, *Xcl1* and *Cxcl16*, presumably leading to an attenuation of obesity-induced metaflammation.

Obesity-induced metaflammation is a trigger for the development of insulin resistance which is in turn correlated with increased lipolysis in adipose tissue leading to a rise in FFA levels in serum of obese mice and humans (Arner and Rydén, 2015). These FFAs serve as energy source and can, after  $\beta$ -oxidation, be transformed to ATP by oxidative phosphorylation in mitochondria. Here, we show that NK cell-specific

457 disruption of P2Y6R-signaling improves insulin sensitivity in mice on HFD, most  
458 prominently reflected by an insulin-induced reduction of lipolysis in adipose tissue and  
459 repression of glucose production in liver. A causal linkage between insulin suppression  
460 of lipolysis and suppression of liver glucose output has been reported in dogs (Rebrin  
461 *et al.*, 1996), in rats (Lam *et al.*, 2002; Lam *et al.*, 2003) and in humans (Lewis *et al.*,  
462 1997).

463 In adult liver, expression of the enzyme lipoprotein lipase (Lpl) is physiologically  
464 relatively low (Liu *et al.*, 2016) but can be increased by insulin (Ramos *et al.*, 1999) or  
465 pro-inflammatory molecules such as TNF $\alpha$  (Enerbäck *et al.*, 1988). We found that *Lpl*  
466 gene expression is up-regulated in liver of P2Y6 $\Delta$ Ncr1 mice in the clamped (insulin-  
467 stimulated) state but not in basal (unstimulated) conditions (data not shown).  
468 Furthermore, it is known, that the activity of Lpl is modulated by apolipoproteins such  
469 as apolipoprotein A-V (Apoa5) (Fruchart-Najib *et al.*, 2004) whose expression in turn  
470 is regulated by insulin via phosphoinositide 3-kinases (PI3K) (Nowak *et al.*, 2005) or  
471 on a transcriptional level by the nuclear receptor RAR Related Orphan Receptor alpha  
472 (Rora) (Genoux *et al.*, 2005). In our transcriptomic studies of clamped liver, we found  
473 that the expression of both these genes *Apoa5* and *Rora* is down-regulated in  
474 P2Y6 $\Delta$ Ncr1 mice. These observations further support the finding that hepatic insulin  
475 sensitivity is improved in these mice, while insulin-stimulated AKT activation remained  
476 unaltered.

477 Collectively, our data show that depletion of P2Y6R in NK cells reduces  
478 metaflammation in adipose tissue of HFD-fed mice leading to an overall improvement  
479 in insulin sensitivity. This improvement in insulin sensitivity is mainly reflected by a  
480 reduction of lipolysis in PGAT, an improved insulin-mediated suppression of HGP and  
481 the regulation of insulin-dependent genes, despite the notion that assessment of  
482 insulin-stimulated AKT activation upon injection of a high dose of insulin was  
483 comparable between the mice of the different genotypes.

484 NK cells are a heterogeneous innate lymphocyte cell population with organ- and  
485 microenvironment-specific expression patterns of cytotoxic molecules, receptors and  
486 transcription factors (Crinier *et al.*, 2018; Zhao *et al.*, 2020). Despite this tissue-  
487 specificity, we found a common set of ten genes that were similarly differentially  
488 expressed in adipose tissue and liver of clamped, thus insulin-stimulated mice. As we  
489 assumed that this gene set reflects that of tissue-infiltrating NK cells, rather than being  
490 an insulin-regulated gene set, we further investigated the transcriptome of isolated NK

491 cells from adipose tissue and liver of HFD-fed P2Y6<sup>fl/fl</sup> and P2Y6<sup>ΔNcr1</sup> mice. Also here,  
 492 transcripts of this gene set were found to be differentially expressed in NK cells of both  
 493 origins, supporting our hypothesis that this gene set is NK cell-specific and that the  
 494 deletion of P2Y6R from NK cells might alter the intrinsic expression pattern of tissue  
 495 infiltrating NK cells. There are multiple unique lineages of NK cells, e.g. circulating  
 496 conventional (c)NK cells, thymic NK cells, tissue-resident (tr)NK cells of the liver and  
 497 skin and uterine (u)NK cells (Sojka, Tian, Yokoyama, 2014; Peng and Tian, 2017;  
 498 Hashemi and Malarkannan, 2020). Each of these NK cell populations is characterized  
 499 by a unique repertoire of receptors and cytokines and seems to emerge from a distinct  
 500 developmental pathway (Erick and Brossay, 2016). Conventional NK cells are  
 501 characterized by the expression of DX5 (CD49b) and are found as circulating cells in  
 502 the blood or as tissue-infiltrating cells in different organs (Sojka *et al.*, 2014; Erick and  
 503 Brossay, 2016). In contrast to that, tissue-resident NK cells are characterized by the  
 504 expression of CD49a and exhibit a rather immature phenotype (Sojka, Tian, Yokoyama,  
 505 2014; Sojka *et al.*, 2014). Despite a large amount of studies with RNASeq data of NK  
 506 cells from different origins such as blood (Yang *et al.*, 2019; Smith *et al.*, 2020; Zhao  
 507 *et al.*, 2020), liver (Filipovic *et al.*, 2019; Zhao *et al.*, 2020) and spleen (Peng *et al.*,  
 508 2013; Sojka *et al.*, 2014; Zhao *et al.*, 2020), as well as from tumor infiltrating NK cells  
 509 (de Andrade *et al.*, 2019; Cursons *et al.*, 2019), we could assign none of the ten genes  
 510 of our NK cell-specific gene cluster to any of these available gene sets with the  
 511 exception of *Rora*, whose expression has been reported to be higher in liver-resident  
 512 DX5<sup>+</sup> NK cells (Peng *et al.*, 2013).

513 The only gene that was consistently up-regulated in all our transcriptomic data  
 514 sets was *Lilra5*. This receptor belongs to the family of leukocyte immunoglobulin-like  
 515 receptors which are known to regulate leukocyte activation. Lilra5 has been reported  
 516 to exist as transmembrane protein or as secreted molecule (Borges *et al.*, 2003). The  
 517 ligands for some but not all LILRs are classical and non-classical HLA-class I  
 518 molecules, however the ligand for Lilra5 is still unknown (Kaur *et al.*, 2013). Cross-  
 519 linking Lilra5 to the surface of macrophages has been reported to trigger an increase  
 520 in intracellular calcium concentrations and the release of cytotoxic molecules such as  
 521 TNFα and IL-10 (Mitchell *et al.*, 2008). Our data shows clear expression of *Lilra5* in  
 522 P2Y6R-deficient NK cells, however in literature it is reported to be mainly expressed in  
 523 macrophages and to some extent in B cells and granulocytes (Human Protein Atlas,  
 524 <https://www.proteinatlas.org/>) and functional studies on Lilra5 until now are limited.



Collectively, our findings underline the importance of further studies to unravel the role of P2Y6R-signaling in NK cells especially in regard to the regulation of this here reported NK cell-specific gene cluster. In light of the finding that cell numbers in spleen and liver of P2Y6<sup>ΔNcr1</sup> mice are reduced, further studies on conventional and tissue-resident NK cells and their infiltration kinetics in dependence of P2Y6R-signaling should be conducted to further define the impact of NK cell-specific P2YR-signaling on obesity-induced metaflammation.

Several publications have reported a role for a P2Y6R-dependent regulation of cytokine expression and release in macrophages (Bar *et al.*, 2008; Lattin *et al.*, 2008). In light of macrophages' roles as drivers for obesity-induced metaflammation (Xu *et al.*, 2003) and an increase in UDP levels in adipose tissue upon HFD-feeding, it was an obvious question whether macrophage-specific P2Y6R-signaling might contribute to obesity-associated metaflammation and development of insulin resistance. However, here we showed that mice with macrophage-specific abrogation of P2Y6R-signaling did not present in any conspicuous phenotype in regard to bodyweight development, insulin sensitivity, food intake or energy expenditure. In addition, we did not observe any alterations in adipose tissue inflammation. As obesity development is accompanied by a macrophage switch from M2- to M1-polarized macrophages in adipose tissue (Castoldi *et al.*, 2016), it was interesting to note that the expression of P2Y6R is 3-fold up-regulated in M2-polarized macrophages compared to unpolarized or M1-polarized macrophages *in vitro*. Comparison of M1 and M2 polarized macrophages derived from human blood only reported a difference in the expression of other P2Y receptors such as P2Y1R, P2Y12R and P2Y13R that were found to be down-regulated in M1 compared to M2 macrophages and P2Y2R, P2Y8R, P2Y10R and P2Y14R being up-regulated (Gerrick *et al.*, 2018). Another study on murine BMDMs found P2Y1R to be up-regulated in M2-polarized macrophages when compared to unpolarized cells (Jablonski *et al.*, 2015). Nevertheless, our data clearly indicate that P2Y6R signaling in macrophages appears to be dispensable for the manifestation of obesity-induced metaflammation.

Taken together, our study demonstrates that insulin sensitivity and metaflammation depend on P2Y6R signaling in NK cells in the context of obesity, which may provide a target for the treatment of obesity-associated pathologies and diabetes.

## Materials and Methods

### Animals

All mouse experiments were approved by the local authorities (Bezirksregierung Köln, Germany) and conducted in accordance with NIH guidelines. Mice were housed in groups of 3-5 animals at 22-24°C and a 12-hour light/dark cycle. Mice had *ad libitum* access to food and water at all times, and food was only withdrawn if required for an experiment. Mouse models were generated by crossing previously published mouse strains, all of which have been backcrossed to C57BL/6 mice for at least ten generations. Briefly, mice with a conditional knockout of the P2Y6R gene in NK cells (P2Y6<sup>ΔNcr1</sup>) were generated by crossing Ncr1-Cre mice (Eckelhardt *et al.*, 2011) with P2Y6R-floxed mice (Jain *et al.*, 2020) and line breeding was maintained with Ncr1-Cre<sup>+/-</sup>:P2Y6<sup>fl/fl</sup> crossed with Ncr1-Cre<sup>-/-</sup>:P2Y6<sup>fl/fl</sup> mice. Mice with a conditional knockout of the P2Y6R gene in macrophages (P2Y6<sup>ΔLysM</sup>) were generated by crossing LysM-Cre mice (Clausen *et al.*, 1999) with P2Y6R-floxed mice (Jain *et al.*, 2020) and line breeding was maintained with LysM-Cre<sup>+/-</sup>:P2Y6<sup>fl/fl</sup> crossed with LysM-Cre<sup>-/-</sup>:P2Y6<sup>fl/fl</sup> mice. Genotyping of mouse lines was performed by genomic PCR on DNA isolated from tail biopsies using the primers listed in table 1. C57BL/6 N mice were ordered from Charles River (Cologne, Germany).

**Table 1: Genotyping primers.**

| Primer Name     | Transgene | Sequence                       | PCR product  |
|-----------------|-----------|--------------------------------|--------------|
| Ncr1-Cre227.for | Ncr1-Cre  | GACCATGATGCTGGGTTTGGCCCAGATG   |              |
| Ncr1-Cre146.rev |           | ATGCGGTGGGCTCTATGGCTTCTG       | Cre: 450 bp  |
| Myo F           |           | TTACGTCCATCGTGGACAGC           | Ctrl: 650 bp |
| Myi676          |           | TTCCCGGTATCATCAGCACA           |              |
| LysM-Cre_1      | LysM-Cre  | CTCTAGTCAGCCAGCAGCTG           | Cre: 350 bp  |
| LysM-Cre_2      |           | ATGTTTAGCTGGCCCAAATGT          | Ctrl: 700 bp |
| P2y6-fl-wt-F    | P2Y6-fl   | CTGGGACTTGAACCTAGATCC          | wt: 186 bp   |
| P2y6-fl-wt-R    |           | GCTACTGCTCCTGTACCTAAGC         | flox: 305 bp |
| P2y6del         |           | GTGCGTCATCGTTGTGTGAGTTTGTGTCGA | del: 370 bp  |



## **Metabolic Phenotyping**

### **Diet Induced Obesity and High Fat Diet Feeding**

Mice were fed a normal chow diet (NCD) (ssniff R/M-H Phytoestrogenarm, ssniff Spezialdiäten GmbH, Soest, Germany) until used for experiments. Experimental animals were either fed a high-fat diet (HFD) (ssniff D12492 (I) mod., ssniff Spezialdiäten GmbH, Soest, Germany) or a low-fat, low-sugar control diet (CD) (ssniff D12450B mod. LS, ssniff Spezialdiäten GmbH, Soest, Germany) starting at the age of 6 weeks.

### **Body Composition Analysis**

Body weights were assessed weekly. Body composition was analyzed by computed tomography (CT) in isoflurane-anesthetized mice (Dräger Healthcare, Cologne, Germany). For data acquisition on an IVIS Spectrum CT scanner (Caliper LifeScience, Hopkinton, MA, USA) we used IVIS LivingImage Software V4.3.1. Quantification of lean and fat mass contents were determined with a modification of the previously described Vinci software package 5.06.0 (Cizek *et al.*, 2004) developed at our institution (available at: [www.nf.mpg.de/vinci3](http://www.nf.mpg.de/vinci3)).

### **Glucose and Insulin Tolerance Test, and HOMA-IR Determination**

Glucose tolerance tests were performed in 16 hours overnight-fasted mice after 9, 14 and 20 weeks of HFD- or CD-feeding. Fasted blood glucose concentrations (mg/dl) were determined prior to the *i.p.* injection of 20% (w/v) glucose (B.Braun, Melsungen, Germany; 2 mg/g body weight). Fifteen, 30, 60 and 120 min after injection, blood glucose levels in tail vein blood were measured using an automatic glucometer (Bayer Contour Next, Bayer AG, Leverkusen, Germany). Insulin tolerance tests were performed in random fed mice at corresponding ages as GTTs. Blood glucose concentrations (mg/dl) were determined prior to the test. Before *i.p.* injection of insulin (0.5 mU/g body weight; Insuman Rapid 40 I.E./ml, Sanofi, Paris, France), food was removed from the cages for the duration of the experiment. Blood glucose levels were measured 15, 30 and 60 min after injection. HOMA-IR is a method to quantify insulin resistance. Here, HOMA-IR was calculated using the formula  $(\text{Insulin}_{\text{fasted}} [\mu\text{U/ml}] \times \text{Glucose}_{\text{fasted}} [\text{mg/dl}]) \times 405$ .

## Hyperinsulinemic-Euglycemic Clamp Analyses

Surgical implantation of catheters in the jugular vein was performed as previously described (Könner *et al.*, 2007). After one week of recovery, mice were fasted for 4 hours in the morning of the day of experiment, which was conducted based on the protocol from the Mouse Metabolomic Phenotyping Center at Vanderbilt University (Ayala *et al.*, 2011). Prior to the actual clamp, mice received 270  $\mu$ l of a 3% (v/v) plasma solution at a rate of 0.18 ml/h for 90 min in parallel with a primed-continuous tracer D-[3-<sup>3</sup>H]-Glucose infusion (PerkinElmer, Waltham, MA, USA, 0.8  $\mu$ Ci prime, 0.04  $\mu$ Ci/min). After this basal period, a blood sample was collected from the tail tip for determination of basal parameters. Following, the clamp started with the infusion of an insulin solution (Sanofi, Paris, France or Lilly, Bad Homburg, Germany; 6  $\mu$ U/g/min) together with a 40% glucose solution (Bela Pharm, Vechta, Germany) primed with D-[3-<sup>3</sup>H]-Glucose (0.06 ml/h). After 30 min of infusion, venous blood glucose levels were determined every 10 min using an ultra-sensitive glucometer (B-Glucose Analyzer; Hemocue, Ängelholm, Sweden) and glucose infusion rates were adjusted in order to keep blood glucose at physiological levels ( $\pm$ 140 mg/dl). The steady state was considered, when a fixed glucose infusion rate maintained the blood glucose levels constant ( $\pm$  140 mg/dl) for 30 min. Approximately 90 min after start of the insulin infusion, steady state levels were reached. During the steady state, blood samples were collected every 10 min for the measurement of steady-state parameters. Then, animals received a 100  $\mu$ l bolus of 2-[1-<sup>14</sup>C]-Deoxy-D-glucose (American Radiolabeled Chemicals Inc., St. Louis, MO, USA; 10  $\mu$ Ci) at a rate of 1.2 ml/h. Following, infusion was switched back to insulin (6  $\mu$ U/g/min) and 40% glucose primed with D-[3-<sup>3</sup>H]-Glucose (40  $\mu$ l bolus at 1.2 ml/h followed by continuous infusion at the rate used to keep steady state glucose levels). Blood samples were collected and blood glucose levels determined at 0, 5, 10, 15, 25 and 35 min after this last bolus for follow-up determination of 2-[1-<sup>14</sup>C]-Deoxy-D-glucose withdrawal from plasma.

At the end of the experiment, mice were sacrificed by cervical dislocation, and liver, perigonadal adipose tissue, brain, brown adipose tissue and skeletal muscle were dissected and stored at  $-80^{\circ}$ C. Plasma [3-<sup>3</sup>H]-Glucose radioactivity of basal and steady state was measured as described by the Vanderbilt protocol (Ayala *et al.*, 2011). Plasma 2-[1-<sup>14</sup>C]-Deoxy-D-glucose radioactivity was directly measured in a liquid scintillation counter (Tri-Carb 2810 TR, Perkin Elmer, Waltham, MA, USA). Tissue lysates were processed through ion exchange chromatography columns (Bio Rad

Laboratories Inc., Hercules, CA, USA) to separate 2-[1-<sup>14</sup>C]-Deoxy-D-glucose (2DG) from 2-[1-<sup>14</sup>C]-Deoxy-D-glucose-6-phosphate (2DG6P). Glucose infusion rate (GIR) and hepatic glucose production (HGP) was calculated as previously described (Könner *et al.*, 2007). *In vivo* glucose uptake into perigonadal and brown adipose tissue, brain, liver and skeletal muscle was calculated based on the accumulation of 2DG6P in the respective tissue and the disappearance rate of 2DG from plasma as described previously (Könner *et al.*, 2007).

656

### Analyses of Plasma Samples

Blood was collected in EDTA-treated tubes (Sarstedt, Nümbrecht, Germany) and centrifuged for 10 min at 17 000 g and 4°C. The plasma was immediately frozen in liquid nitrogen and stored at -80°C until used for ELISA analysis. Fasted mouse insulin and leptin plasma concentrations were determined by ELISA with mouse standards according to the manufacturer's guidelines (Ultra Sensitive Mouse Insulin ELISA Kit, Crystal Chem, Elk Grove Village, IL, USA; Mouse Leptin ELISA Kit, Crystal Chem, Elk Grove Village, IL, USA). For the leptin ELISA, plasma samples were diluted 1:20, for the insulin ELISA undiluted plasma samples were used. The concentration of human insulin in plasma of clamped mice was determined by ELISA according to manufacturer's guidelines (Insulin (Human) Ultrasensitive, DRG Diagnostics, Marburg, Germany) using 1:25 diluted plasma samples. Free fatty acid concentration in plasma (diluted 1:25) of clamped mice was determined using a quantitative Free Fatty Acid Assay Kit (Abcam, Cambridge, Great Britain). Absorbance was measured with the Filter Max F5 device (Molecular Devices, San José, CA, USA) at corresponding wavelengths. Concentrations were calculated using a 4-parameter logistic regression analysis.

674

### Indirect Calorimetry

Indirect calorimetry was performed using an open-circuit, indirect calorimetry system (PhenoMaster, TSE systems, Bad Homburg vor der Höhe, Germany). Three days before data acquisition, mice were adapted to the food/drink dispensers of the PhenoMaster system and the body weight was monitored. Then, mice were placed into regular type II cages with sealed lids and allowed to adapt to the chambers at least 24 hours at room temperature (22°C). During data acquisition, mice were provided with

682 food and drink *ad libitum*. All parameters were measured simultaneously and  
683 continuously.

684

## 685 **Gene Expression Analyses**

### 686 **RNA Extraction from Tissues and Cells**

687 Snap frozen tissue samples or cells were homogenized in 0.5-1 ml Qiazol (Qiagen,  
688 Hilden, Germany) using a Retsch Homogenizer (Retsch GmbH, Haan, Germany)  
689 combined with beads (Bertin Technologies, Montigny-le-Bretonneux, France).  
690 Afterwards, 0.2-0.4 ml chloroform were added to each sample and the mixture  
691 incubated for 5 min at RT. Following, samples were centrifuged for 15 min at 4°C and  
692 12 200 g. The supernatant was transferred to a new tube and mixed with the equal  
693 volume of 70% ethanol. The total volume was then transferred to a RNeasy Mini Spin  
694 Column of the RNeasy Mini Kit (Qiagen, Hilden, Germany). Subsequent steps were  
695 conducted as described in the manufacturer's protocol. DNase treatment (15 min at  
696 RT; Qiagen, Hilden, Germany) was only conducted in samples used for RNASeq but  
697 not in samples used for qPCR analysis. Finally, RNA was eluted in H<sub>2</sub>O and stored at  
698 -80°C until further use.

699

### 700 **cDNA Synthesis and Quantitative Real Time PCR**

701 Concentrations of RNA extracted from PGAT, liver or BMDMs were determined with  
702 the NanoDrop ND-1000 device (Thermo Fisher Scientific, Waltham, MA, USA). cDNA  
703 synthesis was conducted using the High Capacity cDNA RT kit according to  
704 manufacturer's guidelines (Applied Biosystems, Foster City, CA, USA). Following,  
705 cDNA was used for real-time PCR analysis using Takyon Low Rox Probe 2x Master  
706 Mix dTTP Blue (Eurogentec, Liège, Belgium) with TaqMan® Assay-on-demand kits  
707 (Applied Biosystems, Foster City, CA, USA). Relative expression of target mRNAs was  
708 adjusted for total RNA content by *hypoxanthine guanine phosphoribosyl transferase 1*  
709 (*Hprt1*) or *TATA binding protein (Tbp)* mRNA qRT-PCR (for target probe details see  
710 table 2). Calculations were performed by a comparative method ( $2^{-\Delta\Delta CT}$ ). Quantitative  
711 PCR was performed on a QuantStudio 7 Flex Real-Time PCR System using the  
712 QuantStudio Real-Time PCR Software v1.3 (Life Technologies, Carlsbad, CA, USA).

713

714

715

716 **Table 2: Probes used for quantitative real time PCR.**

| Target gene   | Probe ID      | Fluorophore | Company                  |
|---------------|---------------|-------------|--------------------------|
| <i>P2y6r</i>  | Mm02620937_s1 | FAM         | Thermo Fisher Scientific |
| <i>Il6</i>    | Mm00446190_m1 | FAM         | Thermo Fisher Scientific |
| <i>Tnfa</i>   | Mm00443258_m1 | FAM         | Thermo Fisher Scientific |
| <i>Ccl2</i>   | Mm00441242_m1 | FAM         | Thermo Fisher Scientific |
| <i>Ccl3</i>   | Mm00441258_m1 | FAM         | Thermo Fisher Scientific |
| <i>Ifng</i>   | Mm01168134_m1 | FAM         | Thermo Fisher Scientific |
| <i>Il10</i>   | Mm00439614_m1 | FAM         | Thermo Fisher Scientific |
| <i>Il12a</i>  | Mm00434165_m1 | FAM         | Thermo Fisher Scientific |
| <i>Il1b</i>   | Mm01336189_m1 | FAM         | Thermo Fisher Scientific |
| <i>Lpl</i>    | Mm00434764_m1 | FAM         | Thermo Fisher Scientific |
| <i>Rora</i>   | Mm01173766_m1 | FAM         | Thermo Fisher Scientific |
| <i>Plin2</i>  | Mm00475794_m1 | FAM         | Thermo Fisher Scientific |
| <i>Lilra5</i> | Mm01335361_m1 | FAM         | Thermo Fisher Scientific |
| <i>Hprt</i>   | Mm01545399_m1 | FAM         | Thermo Fisher Scientific |
| <i>Hprt</i>   | Mm03024075_m1 | VIC         | Thermo Fisher Scientific |
| <i>Tbp</i>    | Mm00446973_m1 | VIC         | Thermo Fisher Scientific |

717

## 718 RNA Sequencing of Clamped Tissue Samples

719 RNA from clamped liver and PGAT samples was isolated as described above. Libraries  
720 were prepared using the TruSeq Stranded mRNA protocol according to the  
721 manufacturer's recommendations (Illumina, San Diego, CA, USA). After validation with  
722 the Agilent 4200 TapeStation (Agilent, Santa Clara, CA, USA) and quantification with  
723 a Qubit device (Invitrogen, Carlsbad, CA, USA), all transcriptome libraries were pooled.  
724 The pool was quantified using the Peqlab KAPA Library Quantification Kit (VWR,  
725 Radnor, PA; USA) and the Applied Biosystems 7900HT Sequence Detection  
726 (ThermoFisher, Waltham, MA, USA) and sequenced on a Illumina NovaSeq S2 flowcell  
727 (Illumina, San Diego, CA, USA) with a PE100 protocol.

728

729

## 730 **Immunoblots**

### 731 **Protein Extraction from Tissue Samples**

732 Snap frozen tissue samples were homogenized in 1 ml lysis buffer containing 50 mM  
733 Tris, 130 mM NaCl, 5 mM EDTA, 1% (v/v) NP-40, 1 mM NaF, 1 mM PMSF (Sigma  
734 Aldrich, St. Louis, MO, USA), cOmplete mini protease inhibitor cocktail (1 tablet/10 ml;  
735 Roche, Basel, Switzerland) and PhosSTOP Phosphatase Inhibitor Cocktail (1 tablet/10  
736 ml; Roche, Basel, Switzerland) using a Retsch Homogenizer (Retsch GmbH, Haan,  
737 Germany) combined with ceramic beads (Bertin Technologies, Montigny-le-  
738 Bretonneux, France). After homogenization for 2 min at a frequency of 30 1/s,  
739 homogenates were incubated for 20 min on ice followed by centrifugation at  
740 13 000 rpm for 20 min at 4°C. Protein concentration was determined relative to a BSA  
741 standard using the Pierce™ BCA™ Protein-Assay (Thermo Scientific, Waltham, MA,  
742 USA). Lysates were finally adjusted to a final concentration of 2 µg/µl with 4X Laemmli  
743 buffer (Bio-Rad, Hercules, CA, USA) containing 10% β-Mercaptoethanol.

744

### 745 **Western Blotting**

746 Proteins (20 µg per well) were separated in 4–15% Criterion™ TGX™ Precast Midi  
747 Protein Gels with 26 wells (Bio-Rad, Hercules, CA, USA) at a constant voltage of  
748 120 V. The SDS-Running buffer contained 200 mM Glycine, 25 mM Tris and 1% (w/v)  
749 SDS. Proteins were transferred to Trans-Blot Turbo Midi 0.2 µm PVDF Transfer  
750 membranes (Bio-Rad, Hercules, CA, USA) using the Trans-Blot Turbosystem (Bio-Rad,  
751 Hercules, CA, USA). Following, membranes were blocked in western blotting reagent  
752 (Roche, Basel, Switzerland) diluted 1:10 in TBS-T buffer (Tris-buffered saline with 1%  
753 (v/v) Tween 20) for 1–2 h at room temperature. Incubation with primary antibodies was  
754 conducted over night at 4°C. Subsequently, membranes were washed three times for  
755 5–7 min in TBS-T followed by the incubation in horse radish peroxidase-labeled  
756 secondary antibody over night at 4°C. All primary and secondary antibodies were  
757 diluted in 5% (v/v) western blotting reagent (Roche, Basel, Switzerland). After washing  
758 for 3 times in TBS-T, membranes were incubated with SuperSignal ECL Western  
759 Blotting Substrate (Thermo Fisher Scientific, Waltham, MA, USA) and luminescence  
760 was detected by the Fusion Solo Vilber Lourmat system (Vilber Lourmat GmbH,  
761 Eberhardzell, Germany). If necessary, membranes were stripped in stripping buffer  
762 (6% SDS (v/v), 188 mM Tris pH 6.8, 2% (v/v) β-Mercaptoethanol) for 30 min at 56°C  
763 in a shaking water bath. Afterwards, membranes were washed three times in TBS-T



followed by blocking in 10% (v/v) western blotting reagent (Roche, Basel, Switzerland) for 1–2 h at room temperature. Then, the incubation with primary and secondary antibodies was conducted as described above. Band intensities were quantified using ImageJ (NIH). The intensity of protein bands was normalized to the intensity of calnexin or  $\beta$ -Actin bands which served as loading control. Band intensities of protein bands from phospho-targets such as pAKT and pHSL were additionally normalized to bands of total protein, AKT and HSL, respectively. For detailed information of individual primary and secondary antibodies see table 3.

**Table 3: Detailed description of antibodies used for Western Blots.**

| Target          | Host   | Dilution | Company                           | Order No. |
|-----------------|--------|----------|-----------------------------------|-----------|
| pAKT            | rabbit | 1:2000   | Cell Signaling, Danvers, MA, USA  | #4060     |
| AKT             | rabbit | 1:2000   | Cell Signaling, Danvers, MA, USA  | #4685     |
| Calnexin        | rabbit | 1:4000   | Merck kGaA, Darmstadt, Germany    | #208880   |
| $\beta$ -Actin  | rabbit | 1:1000   | Cell Signaling, Danvers, MA, USA  | #4967     |
| pHSL-Ser563     | rabbit | 1:1000   | Cell Signaling, Danvers, MA, USA  | #4139     |
| pHSL-Ser565     | rabbit | 1:1000   | Cell Signaling, Danvers, MA, USA  | #4137     |
| HSL             | rabbit | 1:1000   | Cell Signaling, Danvers, MA, USA  | #4107     |
| Anti-rabbit-HRP | goat   | 1:2000   | Sigma Aldrich, St. Louis, MO, USA | #A6154    |

## Analyses of Isolated Immune Cells

### Immune Cell Isolation from Tissue

Leucocytes were isolated from perigonodal adipose tissue (PGAT), liver, spleen and blood from HFD-fed male mice according to the protocol described in Theurich *et al.*, 2017. Briefly, liver and PGAT were dissociated in lysis buffer (liver: 150 mM NaCl, 5.6 mM KCl, 5.5 mM Glucose, 20.1 mM HEPES, 25 mM NaHCO<sub>3</sub>, 2 mM CaCl<sub>2</sub>, 2 mM MgCl<sub>2</sub>, 500 U/ml Collagenase IV; PGAT: 120 mM NaCl, 5.2 mM KH<sub>2</sub>PO<sub>4</sub>, 1 mM MgSO<sub>4</sub>, 10 mM Hepes, 10 mM NaHCO<sub>3</sub>, 500U/ml Collagenase I) with a tissue-lyser (Gentle MACS, Miltenyi Biotec, Bergisch Gladbach, Germany) and digested enzymatically for 20-30 min at 37°C while continuously shaking in a water bath. The spleen was dissociated by pressing it through a 100  $\mu$ m nylon mesh (Greiner Bio-One, Solingen, Germany) and cells were collected in FACS buffer (autoMACS Running Buffer, Miltenyi Biotec, Bergisch Gladbach, Germany). Blood was collected in EDTA-treated tubes

(Sarstedt, Nümbrecht, Germany). Immune cells were separated by centrifugation: adipose tissue homogenates at 400 g and 18°C for 5 min, liver homogenates via 20% (w/v) Histodenz (Sigma Aldrich, St. Louis, MO, USA) density-centrifugation at 1500 g and 4°C, spleen homogenates at 400 g and 4°C for 5 min. Following, cells and blood were subjected to erythrocyte lysis in RBC lysis buffer (BioLegend, San Diego, CA, USA) for 10 min on ice. Erythrocyte lysis was terminated by washing the cells in the 10-fold volume of FACS buffer (autoMACS Running Buffer, Miltenyi Biotec, Bergisch Gladbach, Germany) and passed through a 30 µm cell strainer (BD Biosciences, Franklin Lakes, USA) to remove large cellular debris. After centrifugation at 400 g and 4°C for 5 min, cells were resuspended in 1 ml FACS buffer (autoMACS Running Buffer, Miltenyi Biotec, Bergisch Gladbach, Germany) and used for cell counting.

799

## 800 **Flow Cytometry**

For flow cytometry analysis,  $1 \times 10^5$ - $1 \times 10^6$  cells were stained after Fc-blocking with TruStain FcX (BioLegend, San Diego, CA, USA) and incubation with Zombie Aqua fixable viability dye (BioLegend, San Diego, CA, USA). Fluorochrome-conjugated antibodies were used for specific immunostainings with dilutions (in autoMACS Running Buffer, Miltenyi Biotec, Bergisch Gladbach, Germany) as listed in table 4: anti-mCD45 (30-F11), anti-mCD3 (17A2), anti-mCD19 (6D5), anti-mNK1.1 (PK136), anti-mNcr1 (29A1.4), anti-mCD11b (M1/70), anti-mCD27 (LG.3A10) and anti F4/80 (BM8). Cells were analyzed using an 8-color flow cytometer (MACSQuant10, Miltenyi Biotec, Bergisch Gladbach, Germany) and data analysis was performed with FlowJo 10.4 (FlowJo LLC, BD Biosciences, San Jose, CA, USA) software packages.

811

812

813 **Table 4: Detailed description of antibodies used for flow cytometry.**

| Target       | Fluorophor  | Dilution | Clone   | Company                       | Order No. |
|--------------|-------------|----------|---------|-------------------------------|-----------|
| NK1.1        | BV421       | 1:50     | PK136   | BioLegend, San Diego, CA, USA | #108732   |
| CD19         | PE/Cy7      | 1:50     | 6D5     | BioLegend, San Diego, CA, USA | #115520   |
| CD3          | APC         | 1:100    | 17A2    | BioLegend, San Diego, CA, USA | #100236   |
| CD45         | APC/Cy7     | 1:100    | 30-F11  | BioLegend, San Diego, CA, USA | #103115   |
| CD11b        | PerCP/Cy5.5 | 1:100    | M1/70   | BioLegend, San Diego, CA, USA | #101227   |
| CD27         | PE/Cy7      | 1:50     | LG.3A10 | BioLegend, San Diego, CA, USA | #124215   |
| Live/Dead    | ZombieAqua  | 1:100    | -       | BioLegend, San Diego, CA, USA | #423102   |
| F4/80        | PE          | 1:50     | BM8     | BioLegend, San Diego, CA, USA | #123110   |
| Ncr1         | BV421       | 1:20     | 29A1.4  | BioLegend, San Diego, CA, USA | #137611   |
| NK1.1        | Alexa488    | 1:50     | PK136   | BioLegend, San Diego, CA, USA | #108718   |
| TruStain FcX | -           | 1:100    | -       | BioLegend, San Diego, CA, USA | #101320   |
| CD3          | PerCP/Cy5.5 | 1:100    | 17A2    | BioLegend, San Diego, CA, USA | #100218   |
| CD11b        | APC         | 1:100    | M1/70   | BioLegend, San Diego, CA, USA | #101212   |

814

# 815 RNA Isolation and RNASeq of Bulk Sorted NK Cells

816 NK cells from murine organs and blood were purified from single cell suspensions  
817 using FACS Aria IIIu or FACS Aria Fusion cell sorters (BD Biosciences, San Jose, CA,  
818 USA) after immunostainings as described above. NK cells were sorted from HFD-fed  
819 animals identified as single/viable/CD45<sup>+</sup>/CD3<sup>-</sup>/NK1.1<sup>+</sup>/Ncr1<sup>+</sup> cells using a 70 µm  
820 nozzle at 70 psi pressure. During sorting, sample and collection tubes were chilled.  
821 Purified cells were directly sorted into FACS buffer (autoMACS Running Buffer, Miltenyi  
822 Biotec, Bergisch Gladbach, Germany) and pelleted by centrifugation for 5 min at  
823 400 g and 4°C. Total RNA was extracted using the Arcturus RNA picopure kit (Thermo  
824 Fisher Scientific, Waltham, MA, USA) following the manufacturer's instructions. Due to  
825 the low amount of input material, pre-amplification using the Ovation RNASeq System  
826 V2 (NuGEN, Redwood, CA, USA), was performed as described previously (Paeger *et*  
827 *al.*, 2017). For library preparation, the Illumina Nextera XT DNA sample preparation  
828 protocol (Illumina, San Diego, CA, USA) was used, with 1 ng cDNA input. After

validation with the Agilent 4200 TapeStation (Agilent, Santa Clara, CA, USA) and quantification with a Qubit device (Invitrogen, Carlsbad, CA, USA) all libraries were pooled. The pool was quantified using the Peqlab KAPA Library Quantification Kit (VWR, Radnor, PA; USA) and the Applied Biosystems 7900HT Sequence Detection (ThermoFisher, Waltham, MA, USA) and sequenced on an Illumina NovaSeq system (Illumina, San Diego, CA, USA) with PE100 read length.

## Analysis of RNA-Sequencing Results

We applied the community-curated nfcore/rnaseq analysis pipeline version 1.4.2 (Ewels *et al.*, 2019) for processing RNA-sequencing data. The gene-level quantification was carried out using Salmon 0.14.1 (Patro *et al.*, 2017) using the reference genome GRCm38. The differential gene expression analysis was done using the DESeq2 1.26.0 (Love *et al.*, 2014) R package. We denote a gene differentially expressed with an FDR adjusted\_p\_value ≤ 0.05. Gene-ontology term analysis of the differentially expressed genes was carried out using the clusterProfiler 3.14.3 (Yu *et al.*, 2012) R package.

## NK Cell Isolation by Magnetic Separation and DNA Extraction

For knock out validation, NK cells were isolated from spleen of P2Y6<sup>fl/fl</sup> and P2Y6<sup>ΔNcr1</sup> mice fed a normal chow diet using the mouse NK cell isolation kit from Miltenyi Biotec, (Bergisch Gladbach, Germany). The spleen was dissociated by pressing it through a 100 μm nylon mesh (Greiner Bio-One, Solingen, Germany). Following, erythrocyte lysis was carried out for 10 min on ice in RBC lysis buffer (BioLegend, San Diego, CA, USA). Cells were centrifuged for 5 min at 400 g and 4°C. The pellet was resuspended in FACS buffer (autoMACs Running Buffer, Miltenyi Biotec, Bergisch Gladbach, Germany) and cells were passed through a 30 μm nylon mesh to remove cell clumps. After a second centrifugation at 400 g for 5 min at 4°C, cells were resuspended in 1 ml FACS buffer (autoMACS Running Buffer, Miltenyi Biotec, Bergisch Gladbach, Germany) and used for cell counting. Following, NK cells were isolated according to the manufacturer's protocol (Miltenyi Biotec, Bergisch Gladbach, Germany). As 3 × 10<sup>7</sup> cells were used per sample, all reagent volumes and total volumes were scaled up accordingly. Magnetic separation was carried out using LS columns (Miltenyi Biotec, Bergisch Gladbach, Germany).

After separation, DNA was extracted from isolated NK cells and cells of the flow through (nonNK cells). Cells were lysed in lysis buffer (100 mM Tris-HCl pH 8.5, 5 mM EDTA pH 8.0, 0.2% SDS (v/v), 200 mM NaCl) at 37°C over night. DNA was precipitated in 0.5 ml ice-cold isopropanol followed by incubation in 0.5 ml 70% ethanol. The DNA pellet was resuspended in H<sub>2</sub>O and used for genomic PCR with primers listed in table 1.

## Seahorse Analyses of Liver Micro-Punches

To obtain consistent liver punches for analysis, we used a 0.5 mm EMS-Core Sampling Tool (Electron Microscopy Science, Hatfield, PA, USA). Four to five tissue punches per animal were carefully moved into Seahorse XF96e spheroid microplates (Agilent, Santa Clara, CA, USA) containing Seahorse base medium (Agilent, Santa Clara, CA, USA) with 25 mM glucose, 1 mM sodium pyruvate and 2 mM L-glutamine. The spheroid microplates (Agilent, Santa Clara, CA, USA) were coated with Cell-Tak (22.4 mg/mL; Corning, Corning, NY, USA) to prevent detachment of the tissue punches during the assay. Plates were then transferred to a CO<sub>2</sub>-free incubator and maintained at 37°C for 30 min before starting the assay. Following instrument calibration, plates were transferred to the Seahorse XF96 Flux Analyzer (Agilent, Santa Clara, CA, USA) to record cellular oxygen consumption rates (OCR) and extracellular acidification rates (ECAR). Ten measurements were performed to assess baseline levels.

## Histological Analysis of PGAT and Liver

### MAC2 Staining in PGAT

Perigonodal adipose tissue (PGAT) was isolated and fixed in 4% (w/v) paraformaldehyde for 2-3 days at 4°C. Fixed tissue samples were then embedded in paraffin and 5 µm thick sections were cut at a rotary microtome (Leica, Wetzlar, Germany). After a 10 min incubation in PBS, endogenous peroxidases were blocked for 20 min with 0.3% (v/v) H<sub>2</sub>O<sub>2</sub> (in PBS and 0.25% (v/v) TritonX). After washing with PBS, sections were blocked with 10% (v/v) Rotiblock (Carl Roth, Karlsruhe, Germany) (diluted in PBS and 0.25% (v/v) TritonX) for 80 min. Following, primary antibody incubation in rat-anti-MAC2 antibody (Biozol, Eching, Germany; 1:100 diluted in Signalstain, Cell Signaling, Danvers, MA, USA) was conducted overnight at 4°C. After washing with PBS and 0.25% (v/v) Triton X, secondary antibody incubation with HRP-conjugated goat-anti-rat (Jackson Immuno Research, Cambridgeshire, UK; 1:100

896 diluted in PBS + 0.1% (v/v) TritonX) was carried out for 1h at room temperature. After  
897 washing in PBS and 0.25% Triton X followed by DAB reaction and staining of nuclei  
898 via Mayers Hematoxylin (Sigma Aldrich, St. Louis, MO, USA), sections were scanned  
899 on a Leica DM 1000 LED (Leica, Wetzlar, Germany).

900

### 901 **Oil-Red-O Staining in Liver**

902 After sacrifice, liver tissue was embedded in tissue freezing medium (Leica, Wetzlar,  
903 Germany) and frozen down on dry ice. Liver sections were cut on a cryostat (Leica,  
904 Wetzlar, Germany) as 7  $\mu$ m thick sections. Prior to the staining, tissue sections were  
905 washed for 5 min in tap water, followed by an incubation in Oil-Red-O solution (0.3 g  
906 Oil-Red-O (Sigma Aldrich, St. Louis, MO, USA) in 60 ml isopropanol and 40 ml tap  
907 water) for 15 min. After several washes in tap water, sections were incubated for 5 min  
908 in Mayers Hematoxylin (Sigma Aldrich, St. Louis, MO, USA) followed by a 15 min  
909 incubation in tap water. Sections were embedded in Kaiser's glycerine gelatine (Merck  
910 Millipore, Burlington, MA, USA) and scanned on a Leica DM 1000 LED (Leica, Wetzlar,  
911 Germany).

912

### 913 **Quantification of Immunohistochemical Stainings**

914 MAC2 and Oil-Red-O stainings were quantified using Image J (NIH, Bethesda, MD,  
915 USA). First, images (RGB color) were split into different channels. Threshold was  
916 adjusted for the blue channel by finding a threshold value that fits at minimum three  
917 independent pictures. Integrated density values were used in order to compare  
918 genotypes. Each data point in Suppl. Fig.S8A and Suppl. Fig. S10 represents the mean  
919 integrated density value  $\pm$  SEM of 2-3 technical replicates each of them originating  
920 from one biological replicate (one mouse).

921 The size of adipocytes was quantified using the Adiposoft plugin (Version 1.16; CIMA,  
922 University of Navarra) for Image J (NIH, Bethesda, MD, USA).

923

### 924 **Bone Marrow-Derived Macrophage Cultures**

925 Bone marrow was isolated from ethanol-rinsed (70% v/v) femurs and tibias of C57BL/6,  
926 P2Y6 <sup>$\Delta$ LysM</sup> or P2Y6<sup>fl/fl</sup> mice fed a normal chow diet. Collected cells were centrifuged for  
927 1 min at 300 g and 4°C, followed by red blood cell lysis in RBC lysis buffer (BioLegend,  
928 San Diego, CA, USA) for 5 min on ice. Following, cells were passed through a 30  $\mu$ m  
929 cell strainer to remove cellular debris and pelleted by centrifugation at 1200 rpm for



5 min at 4°C. Then, cells were re-suspended in culture medium (RPMI 1640 w/o phenolred (Thermo Fisher Scientific, Waltham, MA, USA) supplemented with 10% FCS (v/v), 1% glutamine (v/v), 1% penicillin-streptomycin (v/v) and 50 ng/ml M-CSF (Miltenyi Biotec, Bergisch Gladbach, Germany) and seeded at a density of  $5 \times 10^5$  cells per well of a 6-well plate. Cells were differentiated for a minimum of 7 days with medium exchange every third day. One day before polarization experiments, BMDMs were washed twice with sterile PBS and further cultured in the absence of M-CSF. Cells were stimulated with 100 ng/ml LPS (Sigma Aldrich, St. Louis, MO, USA) and 20 ng/ml IFN $\gamma$  (Thermo Fisher Scientific, Waltham, MA, USA) for M1-polarization or with 50 ng/ml IL-6 (R&D Systems, Minneapolis, MN, USA) and 20 ng/ml IL-4 (Miltenyi Biotec, Bergisch Gladbach, Germany) for M2-polarization. After 24 h of stimulation, cells were washed twice with sterile PBS and harvested using cell scrapers. Following centrifugation, cell pellets were stored at -80°C until further use.

943

#### 944 **Lipidomic Analyses of Liver Tissue**

Chain-length specific DAG and TAG species from liver samples were quantified by nano-electrospray ionization tandem mass spectrometry (Nano-ESI-MS/MS) according to the protocol described in Turpin *et al.* 2019. Conditions of lipid extraction, Nano-ESI-MS/MS analysis and processing of mass spectra and quantification of lipid species was done as previously described (Kumar *et al.*, 2015).

950

#### 951 **Metabolomic Analyses**

##### 952 **Sample collection**

Mice were sacrificed after 6 and 12 weeks of HFD- or normal chow-diet feeding. A piece of liver tissue from the left lobe was dissected and directly snap frozen in liquid nitrogen. Perigonadal adipose tissue was dissected and dissociated in lysis buffer (120 mM NaCl, 5.2 mM KH $_2$ PO $_4$ , 1 mM MgSO $_4$ , 10 mM Hepes, 10 mM NaHCO $_3$ , 500U/ml Collagenase I) with a tissue-lyser (Gentle MACS, Miltenyi Biotec, Bergisch Gladbach, Germany, Germany) and digested enzymatically for 20-30 min at 37°C while continuously shaking in a water bath. Adipocytes and stromal vascular fraction cells were separated by centrifugation at 400 g at 18°C for 5 min. After centrifugation, the adipocytes accumulated as fat layer on the surface of the suspension and the SVF cells were pelleted at the bottom. Adipocytes were carefully transferred to a new vial and washed twice in PEB buffer (BSA 0.5% w/v, 2 mM EDTA, PBS) and then quick

964 frozen in liquid nitrogen. The SVF cells were washed twice in PEB buffer and then snap  
965 frozen as pellet. Blood was collected in EDTA-treated tubes (Sarstedt, Nümbrecht,  
966 Germany) and plasma generated by centrifugation at 17 000 g for 10 min at 4°C,  
967 followed by snap freezing in liquid nitrogen. All samples were stored at -80°C until  
968 being used for metabolomic analyses.

969

## 970 **Metabolite Extraction**

971 Samples were aliquoted and, if necessary disintegrated with a ball mill (Qiagen,  
972 TissueLyser II). Each sample was extracted in 1000 µl of pre-cooled (- 20°C) extraction  
973 buffer (UPLC-grade acetonitrile:methanol:water [40:40:20 v/v]), which was spiked with  
974 50 ng/ml of uridine d2 (Santa Cruz Biotechnology, sc-213138) and UDP-α-D-13C  
975 glucose (Cambridge Isotope Laboratories, CLM-10513) as internal standards. The  
976 sample was immediately vortexed until the plasma was homogenously suspended and  
977 samples were incubated for 30 min on an orbital mixer at 4°C and 1500 rpm, before  
978 sonicating them for 10 min in an ice-cooled bath-type sonicator. After sonication,  
979 samples were centrifuged for 10 min at 21.100 x g and 4°C and the cleared supernatant  
980 was transferred to fresh 1.5 mL Eppendorf tubes and concentrated to dryness using a  
981 Speed Vac concentrator ([www.eppendorf.com](http://www.eppendorf.com)). In parallel to the analytical samples,  
982 we prepared 50 µl aliquots of reference samples, which were extracted as described  
983 above. These reference samples contained distinct concentrations (0-5000 ng/ml) of  
984 the pure reference compounds uridine (Sigma Aldrich, St. Louis, MO, USA; U3750)  
985 and UDP (Sigma Aldrich, St. Louis, MO, USA; 94330).

986

## 987 **Quantitative LC-MS Analysis of Uridine**

988 For the mass spectrometric analysis of uridine levels, the concentrated metabolite  
989 pellet was re-suspended in 100 µl of UPLC grade water. Five µl of the cleared  
990 supernatant of the re-suspended samples was analyzed on an UPLC (Acquity iClass,  
991 Waters), using a HSST3 (100 x 1.0 mm column with 1.8 µm particle size, Waters)  
992 connected to a Xevo TQ-S (Waters) triple quadrupole mass spectrometer. The flow  
993 rate was set to 100 µl/min of buffer A (0.1% formic acid in UPLC grade water) and  
994 buffer B (0.1% formic acid in UPLC-grade acetonitrile) using the following gradient: 0-  
995 1 min 99-90% A; 1-5 min 90-50% A; 5-6.5 min 50-1%A; 6.6-7.5 min 1% A; 7.5-7.7 min  
996 1-99% A. The column was re-equilibrated at 99% A for additional 3.3 min. The eluting  
997 metabolites were detected in positive ion mode using MRM (multi reaction monitoring)

998 applying the following settings: capillary voltage 2.0 kV, desolvation temperature 550°C,  
999 desolvation gas flow rate 800 l/h, cone gas flow 150 ml/min, collision cell gas flow 0.15  
1000 ml/min. The following MRM transitions were used for relative compound quantification  
1001 of uridine and uridine d2, respectively: m/z precursor mass (M+H<sup>+</sup>) 245/247, fragment  
1002 mass (M+H<sup>+</sup>) m/z 113/115 using a cone voltage of 26/6 V and a collision energy of  
1003 16/10 V. For confirmation purpose of the analyzed compound an additional transition  
1004 of the precursor mass (M+H<sup>+</sup>) m/z 245/247, fragment mass (M+H<sup>+</sup>) m/z 133/98 using  
1005 a cone voltage of 26/6 V and a collision energy of 16/32 V was analyzed.

1006

# 1007 **Anion-Exchange Chromatography-Mass Spectrometry (AEC-MS) Analysis of** 1008 **UDP**

1009 Parallel to the analysis of uridine an aqueous aliquot of the re-suspended metabolite  
1010 pellet was analyzed using a Dionex ion chromatography system (ICS 5000+, Thermo  
1011 Fisher Scientific, Waltham, MA, USA) connected to a QE-HF mass spectrometer  
1012 (Thermo Fisher Scientific, Waltham, MA, USA). The applied protocol was adopted from  
1013 [2]. In brief: 5 µl of the metabolite extract were injected in push partial loop mode using  
1014 an overfill factor of 3, onto a Dionex IonPac AS11-HC column (2 mm × 250 mm, 4 µm  
1015 particle size, Thermo Fisher Scientific, Waltham, MA, USA) equipped with a Dionex  
1016 IonPac AG11-HC guard column (2 mm × 50 mm, 4 µm, Thermo Fisher Scientific,  
1017 Waltham, MA, USA). The column temperature was held at 30°C, while the auto  
1018 sampler was set to 6°C. The metabolites were separated using a potassium hydroxide  
1019 gradient, which was generated by an eluent generator using a potassium hydroxide  
1020 cartridge that was supplied with deionized water. The AEC flow rate was set to 380  
1021 µl/min, applying the following gradient. 0-8 min, 30-35 mM KOH; 8-12 min, 35-100 mM  
1022 KOH; 12-15 min, 100 mM KOH, 15-15.1 min, 100-30 mM KOH. The column was re-  
1023 equilibrated at 30 mM KOH for 3.9 min. The eluting metabolites were detected in  
1024 negative ion mode using a MRM method on a Waters TQ triple quadrupole mass  
1025 spectrometer (Waters). The MS settings for the analysis were: capillary voltage 2.75  
1026 kV, desolvation temperature 550°C, desolvation gas flow 800 l/h. The following MRM  
1027 transitions were used for relative compound quantification of UDP and UDP-13C-Glc,  
1028 respectively: m/z precursor mass (M-H<sup>+</sup>) 403/571, fragment mass (M-H<sup>+</sup>) m/z 159/323  
1029 using a cone voltage of 34/38 V and a collision energy of 26/24 V. For confirmation  
1030 purpose of the analyzed compound an additional fragment mass (M-H<sup>+</sup>) m/z 111/96  
1031 using a cone voltage of 34/38 V and a collision energy of 20/34 was analyzed.

Data analysis and peak integration was performed using the TargetLynx Software (Waters). Both uridine and UDP was quantified using an independently generated calibration curve of the pure reference compound.

## Statistical Analyses

Depending on their genotype, littermate mice were allocated into experimental groups (P2Y6<sup>fl/fl</sup> vs P2Y6<sup>ΔNcr1</sup> or P2Y6<sup>fl/fl</sup> vs P2Y6<sup>ΔLysM</sup>). For investigations of UDP and uridine levels, two independent cohorts of C57Bl6 mice were randomly assigned to HFD or CD feeding. The numbers of mice, representing the biological replicate, are included in the figure legends. Where multiple trials of the same experiment were conducted (technical replicates), such as for qPCR (duplicates), BMDM culture (duplicates/triplicates) and immunostainings (duplicates/triplicates), the results of these technical replicates were averaged and finally plotted as a single replicate. Statistical significance was tested using Graph Pad Prism 9.0.2 (GraphPad Software Inc., San Diego, CA, USA) and defined as significant, if  $p \leq 0.05$ . Statistical tests that were applied and resulting significance levels are indicated on figures and figure legends.

## Data Availability

Raw RNASeq data have been deposited in the NCBI Gene Expression Omnibus under accession code GSE175591.

1066

## **Acknowledgements**

1067 We thank all co-workers who supported this work at our institution, with special thanks  
1068 to P. Scholl, N. Spenrath, C. Schäfer, K. Marohl, J. Noe and J. Frère for excellent tech-  
1069 nical assistance. We thank Dr. T. Wunderlich and Dr. C. Brandt for fruitful scientific  
1070 discussions and Dr. H. Broenneke, Dr. U. Lichtenberg, Dr. K. Schoefisch and Dr. R.  
1071 Braun for skillful administrative help.

1072

1073

## **Competing interests**

1074 The authors declare no competing interests.

1075

## References

- Arner and Rydén, 2015. Fatty acids, obesity and insulin resistance. *Obesity Facts*, 8:147-155. <https://doi.org/10.1159/000381224>.
- Ayala JE, Bracy DP, Malabanan C, James FD, Ansari T, Fueger PT, McGuinness OP, Wasserman DH. Hyperinsulinemic-euglycemic clamps in conscious, unrestrained mice. *J Vis Exp*. 2011 Nov 16;(57):3188. doi: 10.3791/3188. PMID: 22126863; PMCID: PMC3308587.
- Bakker AB, Wu J, Phillips JH, Lanier LL. NK cell activation: distinct stimulatory pathways counterbalancing inhibitory signals. *Hum Immunol*. 2000 Jan;61(1):18-27. doi: 10.1016/s0198-8859(99)00160-3. PMID: 10658974.
- Bar I, Guns PJ, Metallo J, Cammarata D, Wilkin F, Boeynants JM, Bult H, Robaye B. Knockout mice reveal a role for P2Y6 receptor in macrophages, endothelial cells, and vascular smooth muscle cells. *Mol Pharmacol*. 2008 Sep;74(3):777-84. doi: 10.1124/mol.108.046904. Epub 2008 Jun 3. PMID: 18523137.
- Berg JM, Tymoczko JL, Stryer L. *Biochemistry*. 5th edition. New York: W H Freeman; 2002. Chapter 21, Glycogen Metabolism. Available from: <https://www.ncbi.nlm.nih.gov/books/NBK21190/>. Accessed May 2021.
- Borges L, Kubin M, Kuhlman T. LIR9, an immunoglobulin-superfamily-activating receptor, is expressed as a transmembrane and as a secreted molecule. *Blood*. 2003 Feb 15;101(4):1484-6. doi: 10.1182/blood-2002-05-1432. Epub 2002 Sep 26. PMID: 12393390.
- Castoldi A, Naffah de Souza C, Câmara NO, Moraes-Vieira PM. The Macrophage Switch in Obesity Development. *Front Immunol*. 2016 Jan 5;6:637. doi: 10.3389/fimmu.2015.00637. PMID: 26779183; PMCID: PMC4700258.
- Chen J, Zhao Y, Liu Y. The role of nucleotides and purinergic signaling in apoptotic cell clearance - implications for chronic inflammatory diseases. *Front Immunol*. 2014 Dec 23;5:656. doi: 10.3389/fimmu.2014.00656. PMID: 25566266; PMCID: PMC4274988.
- Cicko S, Grimm M, Ayata K, Beckert J, Meyer A, Hossfeld M, Zissel G, Idzko M, Müller T. Uridine supplementation exerts anti-inflammatory and anti-fibrotic effects in an animal model of pulmonary fibrosis. *Respir Res*. 2015 Sep 15;16(1):105. doi: 10.1186/s12931-015-0264-9. PMID: 26369416; PMCID: PMC4570657.
- Cinti S, Mitchell G, Barbatelli G, Murano I, Ceresi E, Faloia E, Wang S, Fortier M, Greenberg AS, Obin MS. Adipocyte death defines macrophage localization and function in adipose tissue of obese mice and humans. *J Lipid Res*. 2005 Nov;46(11):2347-55. doi: 10.1194/jlr.M500294-JLR200. Epub 2005 Sep 8. PMID: 16150820.



1121 Cízek J, Herholz K, Vollmar S, Schrader R, Klein J, Heiss WD. Fast and robust  
1122 registration of PET and MR images of human brain. *Neuroimage*. 2004 May;22(1):434-  
1123 42. doi: 10.1016/j.neuroimage.2004.01.016. PMID: 15110036.

1124

1125 Clausen BE, Burkhardt C, Reith W, Renkawitz R, Förster I. Conditional gene targeting  
1126 in macrophages and granulocytes using LysMcre mice. *Transgenic Res*. 1999  
1127 Aug;8(4):265-77. doi: 10.1023/a:1008942828960. PMID: 10621974.

1128

1129 Crinier A, Milpied P, Escalière B, Piperoglou C, Galluso J, Balsamo A, Spinelli L,  
1130 Cervera-Marzal I, Ebbo M, Girard-Madoux M, Jaeger S, Bollon E, Hamed S,  
1131 Hardwigsen J, Ugolini S, Vély F, Narni-Mancinelli E, Vivier E. High-Dimensional Single-  
1132 Cell Analysis Identifies Organ-Specific Signatures and Conserved NK Cell Subsets in  
1133 Humans and Mice. *Immunity*. 2018 Nov 20;49(5):971-986.e5. doi:  
1134 10.1016/j.immuni.2018.09.009. Epub 2018 Nov 6. PMID: 30413361; PMCID:  
1135 PMC6269138.

1136

1137 Cursons J, Souza-Fonseca-Guimaraes F, Foroutan M, Anderson A, Hollande F,  
1138 Hadiyah-Zadeh S, Behren A, Huntington ND, Davis MJ. A Gene Signature Predicting  
1139 Natural Killer Cell Infiltration and Improved Survival in Melanoma Patients. *Cancer*  
1140 *Immunol Res*. 2019 Jul;7(7):1162-1174. doi: 10.1158/2326-6066.CIR-18-0500. Epub  
1141 2019 May 14. PMID: 31088844.

1142

1143 de Andrade LF, Lu Y, Luoma A, Ito Y, Pan D, Pyrdol JW, Yoon CH, Yuan GC,  
1144 Wucherpfennig KW. Discovery of specialized NK cell populations infiltrating human  
1145 melanoma metastases. *JCI Insight*. 2019 Dec 5;4(23):e133103. doi:  
1146 10.1172/jci.insight.133103. PMID: 31801909; PMCID: PMC6962021.

1147

1148 de Heredia FP, Gómez-Martínez S, Marcos A. Obesity, inflammation and the immune  
1149 system. *Proc Nutr Soc*. 2012 May;71(2):332-8. doi: 10.1017/S0029665112000092.  
1150 Epub 2012 Mar 20. PMID: 22429824.

1151

1152 Deng Y, Wang ZV, Gordillo R, An Y, Zhang C, Liang Q, Yoshino J, Cautivo KM, De  
1153 Brabander J, Elmquist JK, Horton JD, Hill JA, Klein S, Scherer PE. An adipo-biliary-  
1154 uridine axis that regulates energy homeostasis. *Science*. 2017 Mar  
1155 17;355(6330):eaaf5375. doi: 10.1126/science.aaf5375. Epub 2017 Mar 16. PMID:  
1156 28302796; PMCID: PMC5832364..

1157

1158 Eckelhart E, Warsch W, Zebedin E, Simma O, Stoiber D, Kolbe T, Rüllicke T, Mueller  
1159 M, Casanova E, Sexl V. A novel Ncr1-Cre mouse reveals the essential role of STAT5  
1160 for NK-cell survival and development. *Blood*. 2011 Feb 3;117(5):1565-73. doi:  
1161 10.1182/blood-2010-06-291633. Epub 2010 Dec 2. PMID: 21127177.

1162

1163 El Kouni MH, Naguib FN, Park KS, Cha S, Darnowski JW, Soong SJ. Circadian rhythm  
1164 of hepatic uridine phosphorylase activity and plasma concentration of uridine in mice.

1165 Biochem Pharmacol. 1990 Dec 1;40(11):2479-85. doi: 10.1016/0006-2952(90)90089-  
1166 4. PMID: 2148479.  
1167  
1168 Elliott MR, Cheken FB, Trampont PC, Lazarowski ER, Kadl A, Walk SF, Park D,  
1169 Woodson RI, Ostankovich M, Sharma P, Lysiak JJ, Harden TK, Leitinger N,  
1170 Ravichandran KS. Nucleotides released by apoptotic cells act as a find-me signal to  
1171 promote phagocytic clearance. Nature. 2009 Sep 10;461(7261):282-6. doi:  
1172 10.1038/nature08296. PMID: 19741708; PMCID: PMC2851546.  
1173  
1174 Enerbäck S, Semb H, Tavernier J, Bjursell G, Olivecrona T. Tissue-specific regulation  
1175 of guinea pig lipoprotein lipase; effects of nutritional state and of tumor necrosis factor  
1176 on mRNA levels in adipose tissue, heart and liver. Gene. 1988 Apr 15;64(1):97-106.  
1177 doi: 10.1016/0378-1119(88)90484-2. PMID: 3396878.  
1178  
1179 Erick TK, Brossay L. Phenotype and functions of conventional and non-conventional  
1180 NK cells. Curr Opin Immunol. 2016 Feb;38:67-74. doi: 10.1016/j.coi.2015.11.007.  
1181 Epub 2015 Dec 17. PMID: 26706497; PMCID: PMC4715908.  
1182  
1183 Evaldsson C, Rydén I, Uppugunduri S. Anti-inflammatory effects of exogenous uridine  
1184 in an animal model of lung inflammation. Int Immunopharmacol. 2007 Aug;7(8):1025-  
1185 32. doi: 10.1016/j.intimp.2007.03.008. Epub 2007 Apr 24. PMID: 17570319.  
1186  
1187 Ewels P., Hammarén R., Peltzer A., Moreno D., Garcia M., rfenouil; marchoeppner;  
1188 Senthilkumar Panneerselvam; Sven F.; jun-wan; Johannes Alneberg; aanil; Sofia Hag-  
1189 lund; Paolo Di Tommaso; Anders Jemt; KochTobi; Lavanya Veeravalli; Colin Daven-  
1190 port; Rad Suchecki; Max Natthawut Adulyanukosol; Francesco; Denis OMeally; Chuan  
1191 Wang, 2019. nf-core/rnaseq: nf-core/rnaseq version 1.4 "Gray Crocus Dachshund"  
1192 (version 1.4). Zenodo. <https://doi.org/10.5281/zenodo.3490660>.  
1193  
1194 Filipovic I, Sönnernborg I, Strunz B, Friberg D, Cornillet M, Hertwig L, Ivarsson MA,  
1195 Björkström NK. 29-Color Flow Cytometry: Unraveling Human Liver NK Cell Repertoire  
1196 Diversity. Front Immunol. 2019 Nov 19;10:2692. doi: 10.3389/fimmu.2019.02692.  
1197 PMID: 31798596; PMCID: PMC6878906.  
1198  
1199 Fruchart-Najib J, Baugé E, Niculescu LS, Pham T, Thomas B, Rommens C, Majd Z,  
1200 Brewer B, Pennacchio LA, Fruchart JC. Mechanism of triglyceride lowering in mice  
1201 expressing human apolipoprotein A5. Biochem Biophys Res Commun. 2004 Jun  
1202 25;319(2):397-404. doi: 10.1016/j.bbrc.2004.05.003. PMID: 15178420.  
1203  
1204 Genoux A, Dehondt H, Helleboid-Chapman A, Duhem C, Hum DW, Martin G,  
1205 Pennacchio LA, Staels B, Fruchart-Najib J, Fruchart JC. Transcriptional regulation of  
1206 apolipoprotein A5 gene expression by the nuclear receptor RORalpha. Arterioscler  
1207 Thromb Vasc Biol. 2005 Jun;25(6):1186-92. doi:  
1208 10.1161/01.ATV.0000163841.85333.83. Epub 2005 Mar 24. PMID: 15790933.  
1209

1210 Gerrick KY, Gerrick ER, Gupta A, Wheelan SJ, Yegnasubramanian S, Jaffee EM.  
 1211 Transcriptional profiling identifies novel regulators of macrophage polarization. PLoS  
 1212 One. 2018 Dec 7;13(12):e0208602. doi: 10.1371/journal.pone.0208602. PMID:  
 1213 30532146; PMCID: PMC6286176.  
 1214  
 1215 Giannattasio G, Ohta S, Boyce JR, Xing W, Balestrieri B, Boyce JA. The purinergic G  
 1216 protein-coupled receptor 6 inhibits effector T cell activation in allergic pulmonary  
 1217 inflammation. J Immunol. 2011 Aug 1;187(3):1486-95. doi: 10.4049/jimmunol.1003669.  
 1218 Epub 2011 Jul 1. PMID: 21724990; PMCID: PMC3140636.  
 1219  
 1220 Girart MV, Fuertes MB, Domaica CI, Rossi LE, Zwirner NW. Engagement of TLR3,  
 1221 TLR7, and NKG2D regulate IFN-gamma secretion but not NKG2D-mediated  
 1222 cytotoxicity by human NK cells stimulated with suboptimal doses of IL-12. J Immunol.  
 1223 2007 Sep 15;179(6):3472-9. doi: 10.4049/jimmunol.179.6.3472. PMID: 17804388.  
 1224  
 1225 Gorini S, Callegari G, Romagnoli G, Mammi C, Mavilio D, Rosano G, Fini M, Di Virgilio  
 1226 F, Gulinelli S, Falzoni S, Cavani A, Ferrari D, la Sala A. ATP secreted by endothelial  
 1227 cells blocks CX<sub>3</sub>CL<sub>1</sub>-elicited natural killer cell chemotaxis and cytotoxicity via P2Y<sub>11</sub>  
 1228 receptor activation. Blood. 2010 Nov 25;116(22):4492-500. doi: 10.1182/blood-2009-  
 1229 12-260828. Epub 2010 Jul 28. PMID: 20668227.  
 1230  
 1231 Guh DP, Zhang W, Bansback N, Amarsi Z, Birmingham CL, Anis AH. The incidence of  
 1232 co-morbidities related to obesity and overweight: a systematic review and meta-  
 1233 analysis. BMC Public Health. 2009 Mar 25;9:88. doi: 10.1186/1471-2458-9-88. PMID:  
 1234 19320986; PMCID: PMC2667420.  
 1235  
 1236 Hamada T, Mizuta E, Yanagihara K, Kaetsu Y, Sugihara S, Sonoyama K, Yamamoto Y,  
 1237 Kato M, Igawa O, Shigemasa C, Inokuchi T, Yamamoto T, Shimada T, Ohtahara A,  
 1238 Ninomiya H, Hisatome I. Plasma levels of uridine correlate with blood pressure and  
 1239 indicators of myogenic purine degradation and insulin resistance in hypertensive  
 1240 patients. Circ J. 2007 Mar;71(3):354-6. doi: 10.1253/circj.71.354. PMID: 17322634.  
 1241  
 1242 Hashemi E, Malarkannan S. Tissue-Resident NK Cells: Development, Maturation, and  
 1243 Clinical Relevance. Cancers (Basel). 2020 Jun 12;12(6):1553. doi:  
 1244 10.3390/cancers12061553. PMID: 32545516; PMCID: PMC7352973.  
 1245  
 1246 Haugaard ES, Frantz KB, Haugaard N. Effect of uridine on cellular UTP and glycogen  
 1247 synthesis in skeletal muscle: stimulation of UTP formation by insulin. Proc Natl Acad  
 1248 Sci U S A. 1977 Jun;74(6):2339-42. doi: 10.1073/pnas.74.6.2339. PMID: 267929;  
 1249 PMCID: PMC432166.  
 1250  
 1251 Idzko M, Panther E, Sorichter S, Herouy Y, Berod L, Geissler M, Mockenhaupt M,  
 1252 Elsner P, Girolomoni G, Norgauer J. Characterization of the biological activities of  
 1253 uridine diphosphate in human dendritic cells: Influence on chemotaxis and CXCL8

1254 release. *J Cell Physiol.* 2004 Nov;201(2):286-93. doi: 10.1002/jcp.20070. PMID:  
1255 15334663.

1256

1257 Idzko M, Ferrari D, Eltzschig HK. Nucleotide signalling during inflammation. *Nature.*  
1258 2014 May 15;509(7500):310-7. doi: 10.1038/nature13085. PMID: 24828189; PMCID:  
1259 PMC4222675.

1260

1261 Jablonski KA, Amici SA, Webb LM, Ruiz-Rosado Jde D, Popovich PG, Partida-  
1262 Sanchez S, Guerau-de-Arellano M. Novel Markers to Delineate Murine M1 and M2  
1263 Macrophages. *PLoS One.* 2015 Dec 23;10(12):e0145342. doi:  
1264 10.1371/journal.pone.0145342. PMID: 26699615; PMCID: PMC4689374.

1265

1266 Jain S, Pydi SP, Toti KS, Robaye B, Idzko M, Gavrilova O, Wess J, Jacobson KA. Lack  
1267 of adipocyte purinergic P2Y6 receptor greatly improves whole body glucose  
1268 homeostasis. *Proc Natl Acad Sci U S A.* 2020 Dec 1;117(48):30763-30774. doi:  
1269 10.1073/pnas.2006578117. Epub 2020 Nov 16. PMID: 33199639; PMCID:  
1270 PMC7720204.

1271

1272 Jensen MD, Nielsen S. Insulin dose response analysis of free fatty acid kinetics.  
1273 *Metabolism.* 2007 Jan;56(1):68-76. doi: 10.1016/j.metabol.2006.08.022. PMID:  
1274 17161228.

1275

1276 Jewett A, Gan XH, Lebow LT, Bonavida B. Differential secretion of TNF-alpha and IFN-  
1277 gamma by human peripheral blood-derived NK subsets and association with functional  
1278 maturation. *J Clin Immunol.* 1996 Jan;16(1):46-54. doi: 10.1007/BF01540972. PMID:  
1279 8926285.

1280

1281 Kaur G, Trowsdale J, Fugger L. Natural killer cells and their receptors in multiple  
1282 sclerosis. *Brain.* 2013 Sep;136(Pt 9):2657-76. doi: 10.1093/brain/awt159. Epub 2012  
1283 Jun 25. PMID: 22734127; PMCID: PMC3754456.

1284

1285 Kim SG, Gao ZG, Soltysiak KA, Chang TS, Brodie C, Jacobson KA. P2Y6 nucleotide  
1286 receptor activates PKC to protect 1321N1 astrocytoma cells against tumor necrosis  
1287 factor-induced apoptosis. *Cell Mol Neurobiol.* 2003 Jun;23(3):401-18. doi:  
1288 10.1023/a:1023696806609. PMID: 12825835; PMCID: PMC3140713.

1289

1290 Kim B, Jeong HK, Kim JH, Lee SY, Jou I, Joe EH. Uridine 5'-diphosphate induces  
1291 chemokine expression in microglia and astrocytes through activation of the P2Y6  
1292 receptor. *J Immunol.* 2011 Mar 15;186(6):3701-9. doi: 10.4049/jimmunol.1000212.  
1293 Epub 2011 Feb 11. PMID: 21317391.

1294

1295 Kumar V, Bouameur JE, Bär J, Rice RH, Hornig-Do HT, Roop DR, Schwarz N,  
1296 Brodesser S, Thiering S, Leube RE, Wiesner RJ, Vijayaraj P, Brazel CB, Heller S,  
1297 Binder H, Löffler-Wirth H, Seibel P, Magin TM. A keratin scaffold regulates epidermal  
1298 barrier formation, mitochondrial lipid composition, and activity. *J Cell Biol.* 2015 Dec

1299 7;211(5):1057-75. doi: 10.1083/jcb.201404147. Erratum in: J Cell Biol. 2016 Mar  
1300 28;212(7):877. PMID: 26644517; PMCID: PMC4674273.  
1301  
1302 Könnert AC, Janoschek R, Plum L, Jordan SD, Rother E, Ma X, Xu C, Enriori P, Hampel  
1303 B, Barsh GS, Kahn CR, Cowley MA, Ashcroft FM, Brüning JC. Insulin action in AgRP-  
1304 expressing neurons is required for suppression of hepatic glucose production. Cell  
1305 Metab. 2007 Jun;5(6):438-49. doi: 10.1016/j.cmet.2007.05.004. PMID: 17550779.  
1306  
1307 Lam TK, Yoshii H, Haber CA, Bogdanovic E, Lam L, Fantus IG, Giacca A. Free fatty  
1308 acid-induced hepatic insulin resistance: a potential role for protein kinase C-delta. Am  
1309 J Physiol Endocrinol Metab. 2002 Oct;283(4):E682-91. doi:  
1310 10.1152/ajpendo.00038.2002. PMID: 12217885.  
1311  
1312 Lam TK, van de Werve G, Giacca A. Free fatty acids increase basal hepatic glucose  
1313 production and induce hepatic insulin resistance at different sites. Am J Physiol  
1314 Endocrinol Metab. 2003 Feb;284(2):E281-90. doi: 10.1152/ajpendo.00332.2002.  
1315 PMID: 12531742.  
1316  
1317 Lanier LL. Up on the tightrope: natural killer cell activation and inhibition. Nat Immunol.  
1318 2008 May;9(5):495-502. doi: 10.1038/ni1581. PMID: 18425106; PMCID: PMC2669298.  
1319  
1320 Lattin JE, Schroder K, Su AI, Walker JR, Zhang J, Wiltshire T, Saijo K, Glass CK, Hume  
1321 DA, Kellie S, Sweet MJ. Expression analysis of G Protein-Coupled Receptors in mouse  
1322 macrophages. Immunome Res. 2008 Apr 29;4:5. doi: 10.1186/1745-7580-4-5. PMID:  
1323 18442421; PMCID: PMC2394514.  
1324  
1325 Lazarowski ER, Sesma JI, Seminario-Vidal L, Kreda SM. Molecular mechanisms of  
1326 purine and pyrimidine nucleotide release. Adv Pharmacol. 2011;61:221-61. doi:  
1327 10.1016/B978-0-12-385526-8.00008-4. PMID: 21586361.  
1328  
1329 Le TT, Ziemba A, Urasaki Y, Hayes E, Brotman S, Pizzorno G. Disruption of uridine  
1330 homeostasis links liver pyrimidine metabolism to lipid accumulation. J Lipid Res. 2013  
1331 Apr;54(4):1044-57. doi: 10.1194/jlr.M034249. Epub 2013 Jan 24. PMID: 23355744;  
1332 PMCID: PMC3605981.  
1333  
1334 Lee BC, Kim MS, Pae M, Yamamoto Y, Eberlé D, Shimada T, Kamei N, Park HS,  
1335 Sasorith S, Woo JR, You J, Mosher W, Brady HJ, Shoelson SE, Lee J. Adipose Natural  
1336 Killer Cells Regulate Adipose Tissue Macrophages to Promote Insulin Resistance in  
1337 Obesity. Cell Metab. 2016 Apr 12;23(4):685-98. doi: 10.1016/j.cmet.2016.03.002. Epub  
1338 2016 Mar 31. PMID: 27050305; PMCID: PMC4833527.  
1339  
1340 Lewis GF, Vranic M, Harley P, Giacca A. Fatty acids mediate the acute extrahepatic  
1341 effects of insulin on hepatic glucose production in humans. Diabetes. 1997  
1342 Jul;46(7):1111-9. doi: 10.2337/diab.46.7.1111. PMID: 9200644.  
1343



1344 Li R, Tan B, Yan Y, Ma X, Zhang N, Zhang Z, Liu M, Qian M, Du B. Extracellular UDP  
1345 and P2Y6 function as a danger signal to protect mice from vesicular stomatitis virus  
1346 infection through an increase in IFN- $\beta$  production. *J Immunol.* 2014 Nov 1;193(9):4515-  
1347 26. doi: 10.4049/jimmunol.1301930. Epub 2014 Sep 26. PMID: 25261483.  
1348

1349 Liu G, Xu JN, Liu D, Ding Q, Liu MN, Chen R, Fan M, Zhang Y, Zheng C, Zou DJ, Lyu  
1350 J, Zhang WJ. Regulation of plasma lipid homeostasis by hepatic lipoprotein lipase in  
1351 adult mice. *J Lipid Res.* 2016 Jul;57(7):1155-61. doi: 10.1194/jlr.M065011. Epub 2016  
1352 May 27. PMID: 27234787; PMCID: PMC4918845.  
1353

1354 Love MI, Huber W, Anders S. Moderated estimation of fold change and dispersion for  
1355 RNA-seq data with DESeq2. *Genome Biol.* 2014;15(12):550. doi: 10.1186/s13059-  
1356 014-0550-8. PMID: 25516281; PMCID: PMC4302049.  
1357

1358 Michelet X, Dyck L, Hogan A, Loftus RM, Duquette D, Wei K, Beyaz S, Tavakkoli A,  
1359 Foley C, Donnelly R, O'Farrelly C, Raverdeau M, Vernon A, Pettee W, O'Shea D,  
1360 Nikolajczyk BS, Mills KHG, Brenner MB, Finlay D, Lynch L. Metabolic reprogramming  
1361 of natural killer cells in obesity limits antitumor responses. *Nat Immunol.* 2018  
1362 Dec;19(12):1330-1340. doi: 10.1038/s41590-018-0251-7. Epub 2018 Nov 12. PMID:  
1363 30420624.  
1364

1365 Mitchell A, Rentero C, Endoh Y, Hsu K, Gaus K, Geczy C, McNeil HP, Borges L, Tedla  
1366 N. LILRA5 is expressed by synovial tissue macrophages in rheumatoid arthritis,  
1367 selectively induces pro-inflammatory cytokines and IL-10 and is regulated by TNF-  
1368 alpha, IL-10 and IFN-gamma. *Eur J Immunol.* 2008 Dec;38(12):3459-73. doi:  
1369 10.1002/eji.200838415. PMID: 19009525.  
1370

1371 Murano I, Barbatelli G, Parisani V, Latini C, Muzzonigro G, Castellucci M, Cinti S. Dead  
1372 adipocytes, detected as crown-like structures, are prevalent in visceral fat depots of  
1373 genetically obese mice. *J Lipid Res.* 2008 Jul;49(7):1562-8. doi: 10.1194/jlr.M800019-  
1374 JLR200. Epub 2008 Apr 3. PMID: 18390487.  
1375

1376 Nielsen TS, Jessen N, Jørgensen JO, Møller N, Lund S. Dissecting adipose tissue  
1377 lipolysis: molecular regulation and implications for metabolic disease. *J Mol Endocrinol.*  
1378 2014 Jun;52(3):R199-222. doi: 10.1530/JME-13-0277. Epub 2014 Feb 27. PMID:  
1379 24577718.  
1380

1381 Nowak M, Helleboid-Chapman A, Jakel H, Martin G, Duran-Sandoval D, Staels B,  
1382 Rubin EM, Pennacchio LA, Taskinen MR, Fruchart-Najib J, Fruchart JC. Insulin-  
1383 mediated down-regulation of apolipoprotein A5 gene expression through the  
1384 phosphatidylinositol 3-kinase pathway: role of upstream stimulatory factor. *Mol Cell*  
1385 *Biol.* 2005 Feb;25(4):1537-48. doi: 10.1128/MCB.25.4.1537-1548.2005. PMID:  
1386 15684402; PMCID: PMC548024.  
1387



1388 Oishi S, Takano R, Tamura S, Tani S, Iwaizumi M, Hamaya Y, Takagaki K, Nagata T,  
1389 Seto S, Horii T, Osawa S, Furuta T, Miyajima H, Sugimoto K. M2 polarization of murine  
1390 peritoneal macrophages induces regulatory cytokine production and suppresses T-cell  
1391 proliferation. *Immunology*. 2016 Nov;149(3):320-328. doi: 10.1111/imm.12647. Epub  
1392 2016 Aug 9. PMID: 27421990; PMCID: PMC5046056.  
1393  
1394 Paeger L, Karakasilioti I, Altmüller J, Frommolt P, Brüning J, Kloppenburg P.  
1395 Antagonistic modulation of NPY/AgRP and POMC neurons in the arcuate nucleus by  
1396 noradrenalin. *Elife*. 2017 Jun 20;6:e25770. doi: 10.7554/eLife.25770. PMID: 28632132;  
1397 PMCID: PMC5478265.  
1398  
1399 Pardo J, Balkow S, Anel A, Simon MM. Granzymes are essential for natural killer cell-  
1400 mediated and perfacilitated tumor control. *Eur J Immunol*. 2002 Oct;32(10):2881-7.  
1401 doi: 10.1002/1521-4141(2002010)32:10<2881::AID-IMMU2881>3.0.CO;2-K. PMID:  
1402 12355441.  
1403  
1404 Patro R, Duggal G, Love MI, Irizarry RA, Kingsford C. Salmon provides fast and bias-  
1405 aware quantification of transcript expression. *Nat Methods*. 2017 Apr;14(4):417-419.  
1406 doi: 10.1038/nmeth.4197. Epub 2017 Mar 6. PMID: 28263959; PMCID: PMC5600148.  
1407  
1408 Peng H, Jiang X, Chen Y, Sojka DK, Wei H, Gao X, Sun R, Yokoyama WM, Tian Z.  
1409 Liver-resident NK cells confer adaptive immunity in skin-contact inflammation. *J Clin*  
1410 *Invest*. 2013 Apr;123(4):1444-56. doi: 10.1172/JCI66381. Epub 2013 Mar 25. PMID:  
1411 23524967; PMCID: PMC3613925.  
1412  
1413 Peng H, Tian Z. Diversity of tissue-resident NK cells. *Semin Immunol*. 2017 Jun;31:3-  
1414 10. doi: 10.1016/j.smim.2017.07.006. Epub 2017 Aug 9. PMID: 28802693.  
1415  
1416 Ramos P, Martín-Hidalgo A, Herrera E. Insulin-induced up-regulation of lipoprotein  
1417 lipase messenger ribonucleic acid and activity in mammary gland. *Endocrinology*. 1999  
1418 Mar;140(3):1089-93. doi: 10.1210/endo.140.3.6565. PMID: 10067830.  
1419  
1420 Rebrin K, Steil GM, Mittelman SD, Bergman RN. Causal linkage between insulin  
1421 suppression of lipolysis and suppression of liver glucose output in dogs. *J Clin Invest*.  
1422 1996 Aug 1;98(3):741-9. doi: 10.1172/JCI118846. PMID: 8698866; PMCID:  
1423 PMC507484.  
1424  
1425 Schmidt FM, Weschenfelder J, Sander C, Minkwitz J, Thormann J, Chittka T, Mergl R,  
1426 Kirkby KC, Faßhauer M, Stumvoll M, Holdt LM, Teupser D, Hegerl U, Himmerich H.  
1427 Inflammatory cytokines in general and central obesity and modulating effects of  
1428 physical activity. *PLoS One*. 2015 Mar 17;10(3):e0121971. doi:  
1429 10.1371/journal.pone.0121971. PMID: 25781614; PMCID: PMC4363366.  
1430  
1431 Smith SL, Kennedy PR, Stacey KB, Worboys JD, Yarwood A, Seo S, Solloa EH,  
1432 Mistretta B, Chatterjee SS, Gunaratne P, Allette K, Wang YC, Smith ML, Sebra R, Mace

1433 EM, Horowitz A, Thomson W, Martin P, Eyre S, Davis DM. Diversity of peripheral blood  
1434 human NK cells identified by single-cell RNA sequencing. *Blood Adv.* 2020 Apr  
1435 14;4(7):1388-1406. doi: 10.1182/bloodadvances.2019000699. PMID: 32271902;  
1436 PMCID: PMC7160259.  
1437  
1438 Steculorum SM, Paeger L, Bremser S, Evers N, Hinze Y, Idzko M, Kloppenburg P,  
1439 Brüning JC. Hypothalamic UDP Increases in Obesity and Promotes Feeding via P2Y6-  
1440 Dependent Activation of AgRP Neurons. *Cell.* 2015 Sep 10;162(6):1404-17. doi:  
1441 10.1016/j.cell.2015.08.032. PMID: 26359991.  
1442  
1443 Steculorum SM, Timper K, Engström Ruud L, Evers N, Paeger L, Bremser S,  
1444 Kloppenburg P, Brüning JC. Inhibition of P2Y6 Signaling in AgRP Neurons Reduces  
1445 Food Intake and Improves Systemic Insulin Sensitivity in Obesity. *Cell Rep.* 2017 Feb  
1446 14;18(7):1587-1597. doi: 10.1016/j.celrep.2017.01.047. PMID: 28199831.  
1447  
1448 Sojka DK, Tian Z, Yokoyama WM. Tissue-resident natural killer cells and their potential  
1449 diversity. *Semin Immunol.* 2014 Apr;26(2):127-31. doi: 10.1016/j.smim.2014.01.010.  
1450 Epub 2014 Feb 16. PMID: 24548893; PMCID: PMC4459495.  
1451  
1452 Sojka DK, Plougastel-Douglas B, Yang L, Pak-Wittel MA, Artyomov MN, Ivanova Y,  
1453 Zhong C, Chase JM, Rothman PB, Yu J, Riley JK, Zhu J, Tian Z, Yokoyama WM.  
1454 Tissue-resident natural killer (NK) cells are cell lineages distinct from thymic and  
1455 conventional splenic NK cells. *Elife.* 2014 Jan 1;3:e01659. doi: 10.7554/eLife.01659.  
1456 PMID: 24714492; PMCID: PMC3975579.  
1457  
1458 Theurich S, Tsaousidou E, Hanssen R, Lempradl AM, Mauer J, Timper K, Schilbach K,  
1459 Folz-Donahue K, Heilingner C, Sexl V, Pospisilik JA, Wunderlich FT, Brüning JC. IL-  
1460 6/Stat3-Dependent Induction of a Distinct, Obesity-Associated NK Cell Subpopulation  
1461 Deteriorates Energy and Glucose Homeostasis. *Cell Metab.* 2017 Jul 5;26(1):171-  
1462 184.e6. doi: 10.1016/j.cmet.2017.05.018. PMID: 28683285.  
1463  
1464 Turpin-Nolan SM, Hammerschmidt P, Chen W, Jais A, Timper K, Awazawa M,  
1465 Brodesser S, Brüning JC. CerS1-Derived C18:0 Ceramide in Skeletal Muscle  
1466 Promotes Obesity-Induced Insulin Resistance. *Cell Rep.* 2019 Jan 2;26(1):1-10.e7. doi:  
1467 10.1016/j.celrep.2018.12.031. PMID: 30605666.  
1468  
1469 Uppugunduri S, Gautam C. Effects of uridine, isomatitol and 4-thiouridine on in vitro  
1470 cell adhesion and in vivo effects of 4-thiouridine in a lung inflammation model. *Int*  
1471 *Immunopharmacol.* 2004 Sep;4(9):1241-8. doi: 10.1016/j.intimp.2004.04.016. PMID:  
1472 15251120.  
1473  
1474 Urasaki Y, Pizzorno G, Le TT. Uridine affects liver protein glycosylation, insulin  
1475 signaling, and heme biosynthesis. *PLoS One.* 2014 Jun 11;9(6):e99728. doi:  
1476 10.1371/journal.pone.0099728. PMID: 24918436; PMCID: PMC4053524.  
1477

1478 Urasaki Y, Pizzorno G, Le TT. Chronic Uridine Administration Induces Fatty Liver and  
1479 Pre-Diabetic Conditions in Mice. PLoS One. 2016 Jan 20;11(1):e0146994. doi:  
1480 10.1371/journal.pone.0146994. PMID: 26789264; PMCID: PMC4720477.  
1481  
1482 Vivier, E, Tomasello, E, Baratin, M, Walzer T, Ugolini S. Functions of natural killer cells.  
1483 Nat Immunol 9, 503–510 (2008). <https://doi.org/10.1038/ni1582>  
1484  
1485 Wang R, Jaw JJ, Stutzman NC, Zou Z, Sun PD. Natural killer cell-produced IFN- $\gamma$  and  
1486 TNF- $\alpha$  induce target cell cytolysis through up-regulation of ICAM-1. J Leukoc Biol. 2012  
1487 Feb;91(2):299-309. doi: 10.1189/jlb.0611308. Epub 2011 Nov 1. PMID: 22045868;  
1488 PMCID: PMC3290424.  
1489  
1490 Weisberg SP, McCann D, Desai M, Rosenbaum M, Leibel RL, Ferrante AW Jr. Obesity  
1491 is associated with macrophage accumulation in adipose tissue. J Clin Invest. 2003  
1492 Dec;112(12):1796-808. doi: 10.1172/JCI19246. PMID: 14679176; PMCID:  
1493 PMC296995.  
1494  
1495 Wensveen FM, Jelenčić V, Valentić S, Šestan M, Wensveen TT, Theurich S, Glasner  
1496 A, Mendrila D, Štimac D, Wunderlich FT, Brüning JC, Mandelboim O, Polić B. NK cells  
1497 link obesity-induced adipose stress to inflammation and insulin resistance. Nat  
1498 Immunol. 2015 Apr;16(4):376-85. doi: 10.1038/ni.3120. Epub 2015 Mar 2. PMID:  
1499 25729921.  
1500  
1501 WHO, 2021. [https://www.who.int/news-room/fact-sheets/detail/obesity-and-](https://www.who.int/news-room/fact-sheets/detail/obesity-and-overweight)  
1502 [overweight](https://www.who.int/news-room/fact-sheets/detail/obesity-and-overweight). Accessed May 2021.  
1503  
1504 Xu H, Barnes GT, Yang Q, Tan G, Yang D, Chou CJ, Sole J, Nichols A, Ross JS,  
1505 Tartaglia LA, Chen H. Chronic inflammation in fat plays a crucial role in the  
1506 development of obesity-related insulin resistance. J Clin Invest. 2003  
1507 Dec;112(12):1821-30. doi: 10.1172/JCI19451. PMID: 14679177; PMCID: PMC296998.  
1508  
1509 Yamamoto T, Moriwaki Y, Takahashi S, Tsutsumi Z, Yamakita J, Higashino K. Effect of  
1510 muscular exercise on the concentration of uridine and purine bases in plasma--  
1511 adenosine triphosphate consumption-induced pyrimidine degradation. Metabolism.  
1512 1997 Nov;46(11):1339-42. doi: 10.1016/s0026-0495(97)90241-9. PMID: 9361696.  
1513  
1514 Yang C, Siebert JR, Burns R, Gerbec ZJ, Bonacci B, Rymaszewski A, Rau M, Riese  
1515 MJ, Rao S, Carlson KS, Routes JM, Verbsky JW, Thakar MS, Malarkannan S.  
1516 Heterogeneity of human bone marrow and blood natural killer cells defined by single-  
1517 cell transcriptome. Nat Commun. 2019 Sep 2;10(1):3931. doi: 10.1038/s41467-019-  
1518 11947-7. PMID: 31477722; PMCID: PMC6718415.  
1519  
1520 Yu G, Wang LG, Han Y, He QY. clusterProfiler: an R package for comparing biological  
1521 themes among gene clusters. OMICS. 2012 May;16(5):284-7. doi:  
1522 10.1089/omi.2011.0118. Epub 2012 Mar 28. PMID: 22455463; PMCID: PMC3339379.

Zhang Z, Wang Z, Ren H, Yue M, Huang K, Gu H, Liu M, Du B, Qian M. P2Y(6) agonist uridine 5'-diphosphate promotes host defense against bacterial infection via monocyte chemoattractant protein-1-mediated monocytes/macrophages recruitment. *J Immunol.* 2011 May 1;186(9):5376-87. doi: 10.4049/jimmunol.1002946. Epub 2011 Mar 28. PMID: 21444765.

Zhao J, Zhang S, Liu Y, He X, Qu M, Xu G, Wang H, Huang M, Pan J, Liu Z, Li Z, Liu L, Zhang Z. Single-cell RNA sequencing reveals the heterogeneity of liver-resident immune cells in human. *Cell Discov.* 2020 Apr 28;6(1):22. doi: 10.1038/s41421-020-0157-z. PMID: 33907176.

Zwirner NW, Domaica CI. Cytokine regulation of natural killer cell effector functions. *Biofactors.* 2010 Jul-Aug;36(4):274-88. doi: 10.1002/biof.107. PMID: 20623510.

## Abbreviations

|      |         |                                                  |
|------|---------|--------------------------------------------------|
| 1568 |         | <b>Abbreviations</b>                             |
| 1569 |         |                                                  |
| 1570 | μCT     | Micro computer tomography                        |
| 1571 | AgRP    | Agouti-related protein                           |
| 1572 | AKT     | Protein kinase B                                 |
| 1573 | Apoa5   | Apolipoprotein A-V                               |
| 1574 | ATP     | Adenosine triphosphate                           |
| 1575 | BAT     | Brown adipose tissue                             |
| 1576 | BMDM    | Bone marrow-derived macrophages                  |
| 1577 | Ccl3    | Chemokine (C-C motif) ligand 3                   |
| 1578 | Ccl4    | Chemokine (C-C motif) ligand 4                   |
| 1579 | CD      | Control Diet                                     |
| 1580 | CLS     | Crown-like structures                            |
| 1581 | cNK     | conventional NK cells                            |
| 1582 | Cxcl16  | Chemokine (C-X-C motif) ligand 16                |
| 1583 | DAG     | Diacylglycerides                                 |
| 1584 | DN      | Double negative                                  |
| 1585 | ECAR    | Extracellular acidification rate                 |
| 1586 | OCR     | Oxygen consumption rate                          |
| 1587 | ELISA   | Enzyme-linked immunosorbent assay                |
| 1588 | ERK     | Extracellular signal-regulated kinases           |
| 1589 | FFA     | Free fatty acids                                 |
| 1590 | GIR     | Glucose infusion rate                            |
| 1591 | GTT     | Glucose tolerance test                           |
| 1592 | HFD     | High fat diet                                    |
| 1593 | HGP     | Hepatic glucose production                       |
| 1594 | HOMA-IR | Homeostasis model assessment- insulin resistance |
| 1595 | HSL     | Hormone-sensitive lipase                         |
| 1596 | IFNγ    | Interferon gamma                                 |
| 1597 | IL      | Interleukin                                      |
| 1598 | ILC     | Innate lymphoid cell                             |
| 1599 | ITT     | Insulin tolerance test                           |
| 1600 | Lilra5  | Leukocyte immunoglobulin like receptor A5        |
| 1601 | Lpl     | Lipoprotein lipase                               |
| 1602 | MAPK    | Mitogen-activated protein kinase                 |
| 1603 | NCD     | Normal chow diet                                 |
| 1604 | NK cell | Natural killer cell                              |
| 1605 | OCR     | Oxygen consumption rate                          |
| 1606 | OXPHOS  | Oxidative phosphorylation                        |
| 1607 | P2Y6R   | P2Y purinoreceptor 6                             |
| 1608 | PGAT    | Perigonadal adipose tissue                       |
| 1609 | pHSL    | phosphorylated hormone-sensitive lipase          |
| 1610 | PI3K    | Phosphoinositide 3-kinase                        |
| 1611 | PKC     | Protein kinase C                                 |
| 1612 | Plin2   | Perilipin 2                                      |

|      |              |                                   |
|------|--------------|-----------------------------------|
| 1613 | RER          | Respiratory exchange rate         |
| 1614 | Rora         | RAR-related orphan receptor alpha |
| 1615 | SEM          | Standard error of the mean        |
| 1616 | SKM          | Skeletal muscle                   |
| 1617 | SVF          | Stromal vascular fraction         |
| 1618 | TG           | Triglycerides                     |
| 1619 | TNF $\alpha$ | Tumor necrosis factor alpha       |
| 1620 | TPM          | Transcripts per million           |
| 1621 | trNK         | tissue-resident NK cells          |
| 1622 | UDP          | Uridine diphosphate               |
| 1623 | uNK          | uterine NK cells                  |
| 1624 | Xcl1         | Chemokine (C motif) ligand        |



## A Body weight development

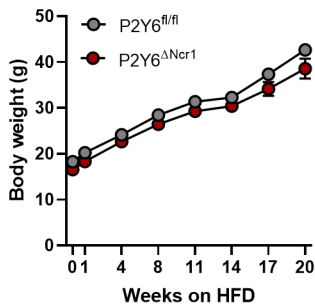

## B Body composition

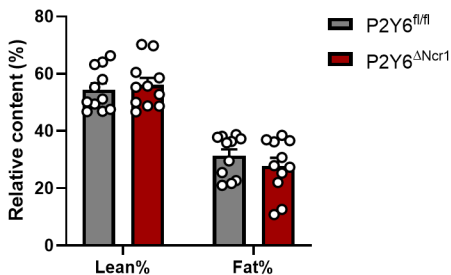

## C Organ weights

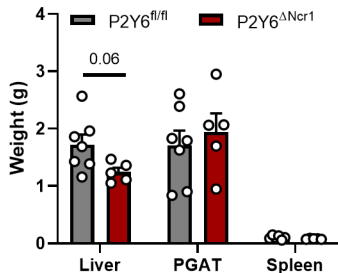

## D Leptin

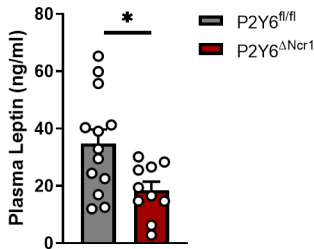

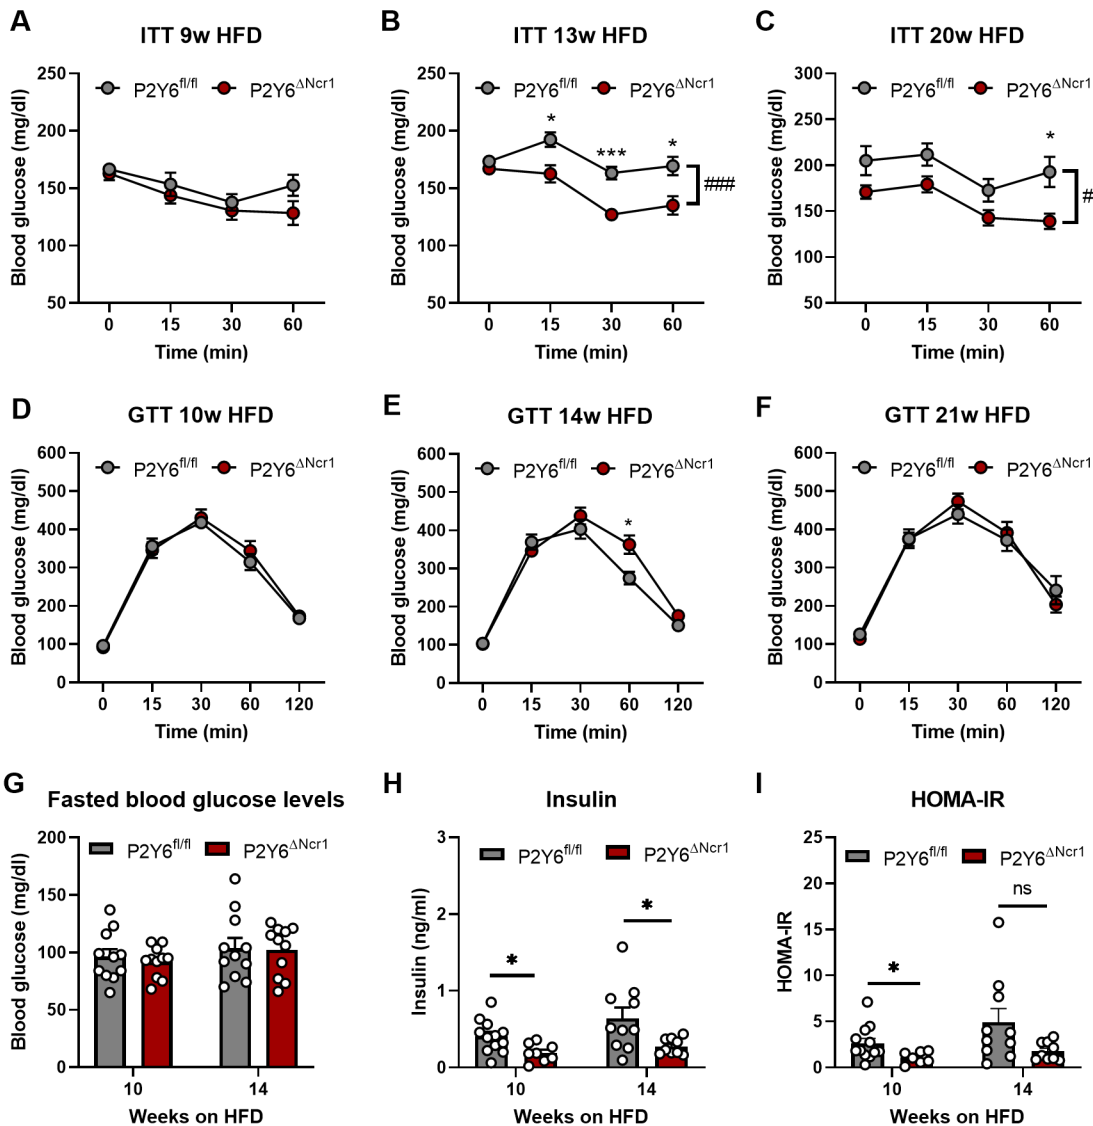

### A Glucose infusion rate

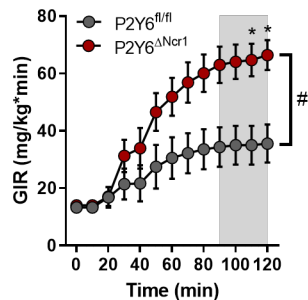

### B Blood glucose levels

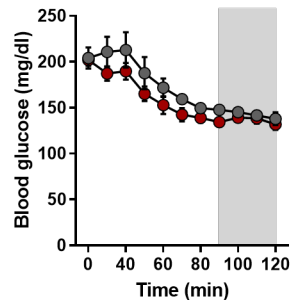

### C Human Insulin

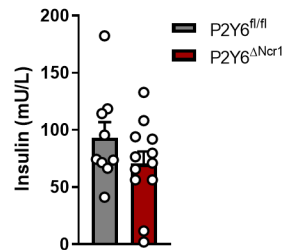

### D Hepatic glucose production

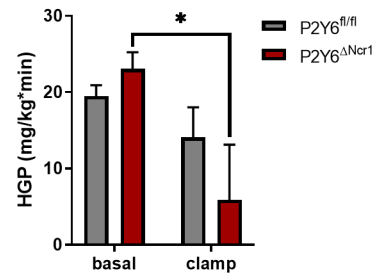

### E FFA Plasma

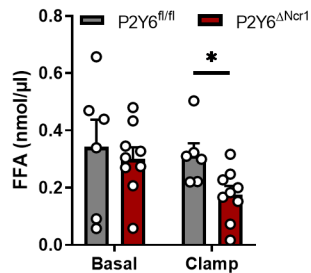

### F

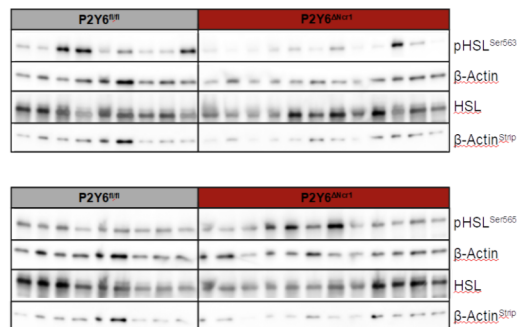

### HSL phosphorylation

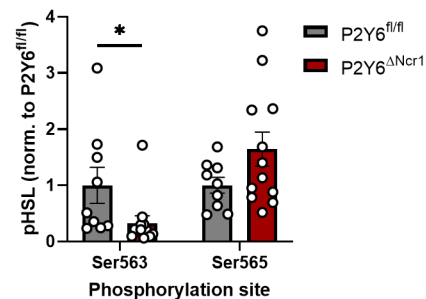

### G Glucose uptake into tissues

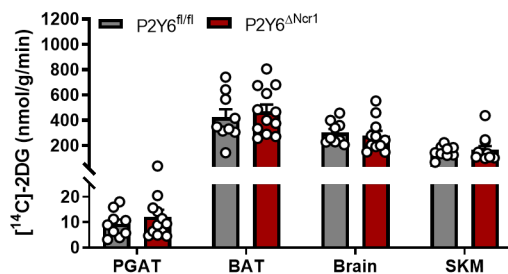

### PGAT

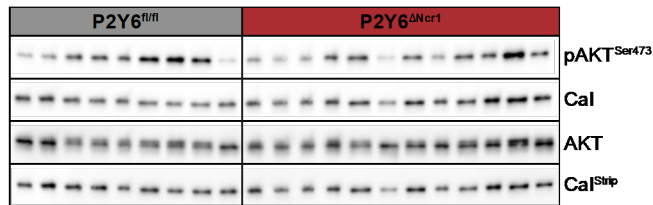

### Brain

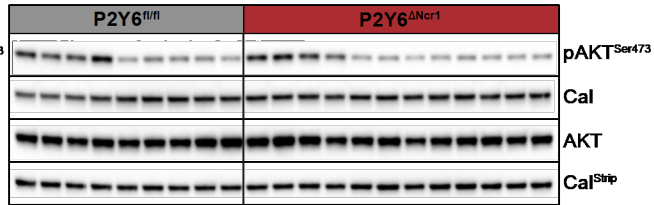

### BAT

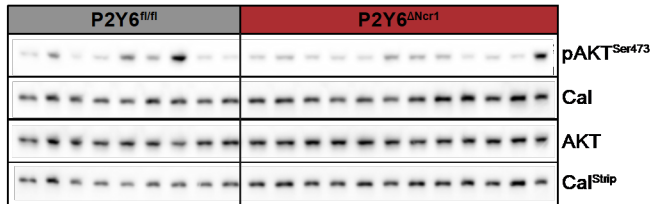

### SKM

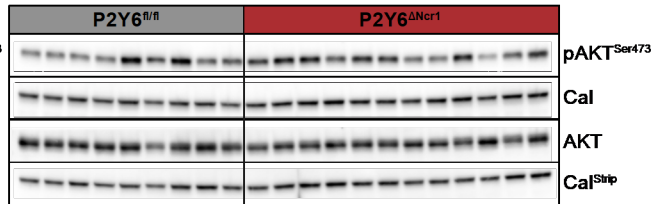

### Liver

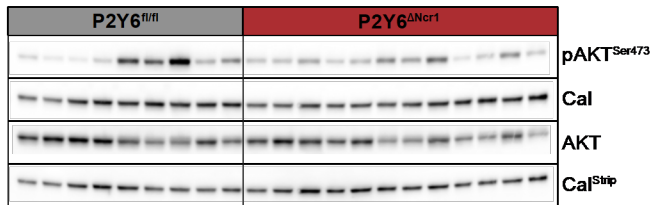

### Insulin signaling

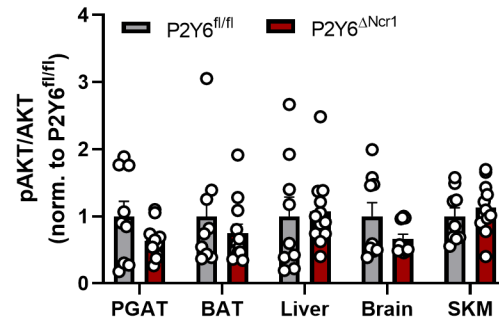

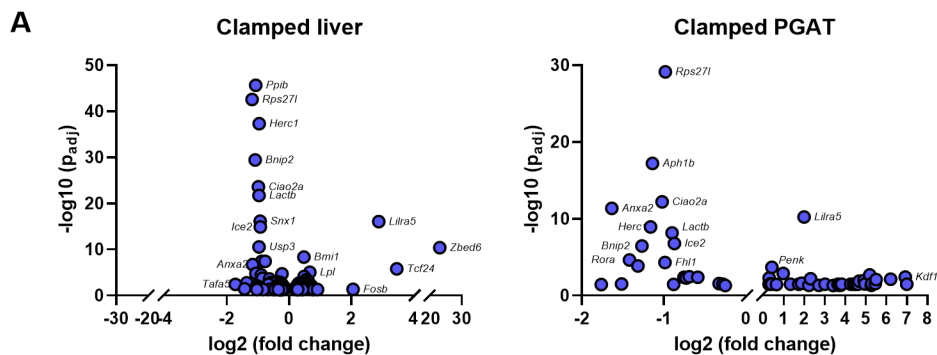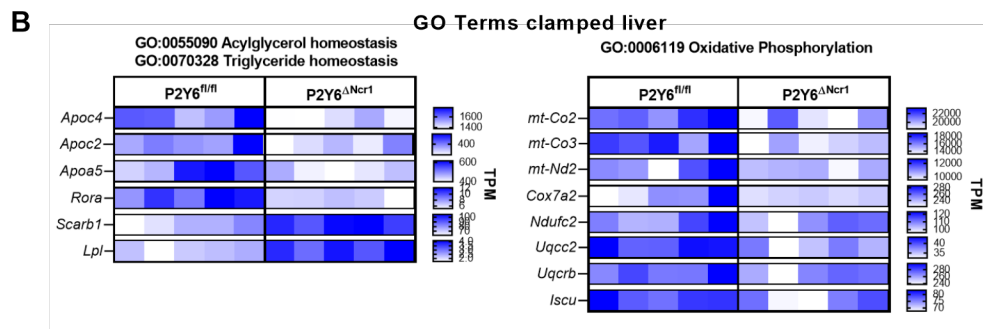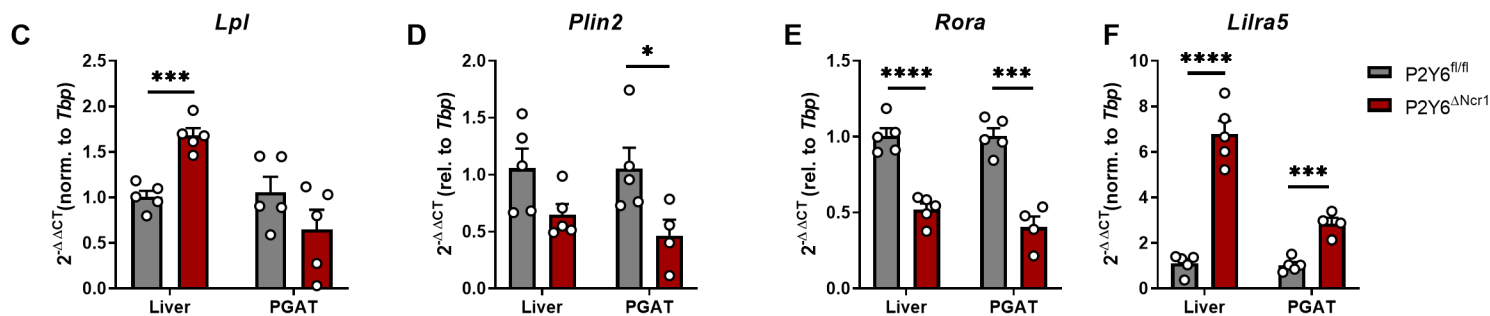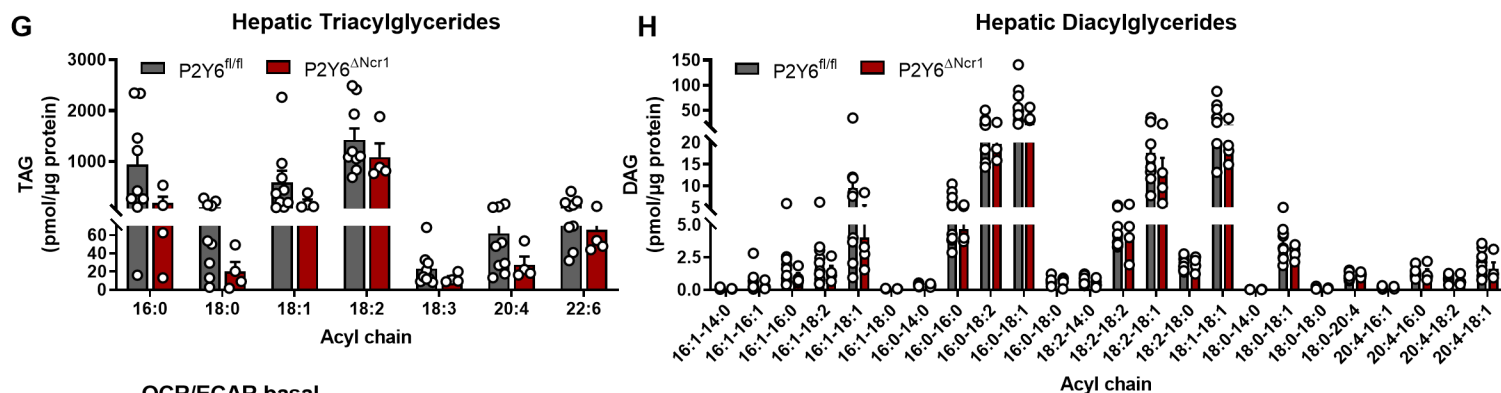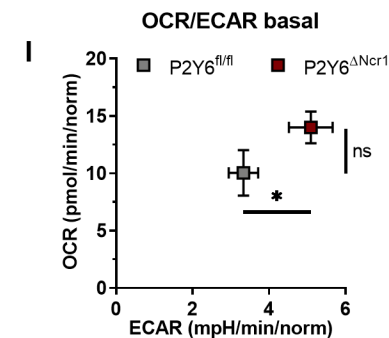

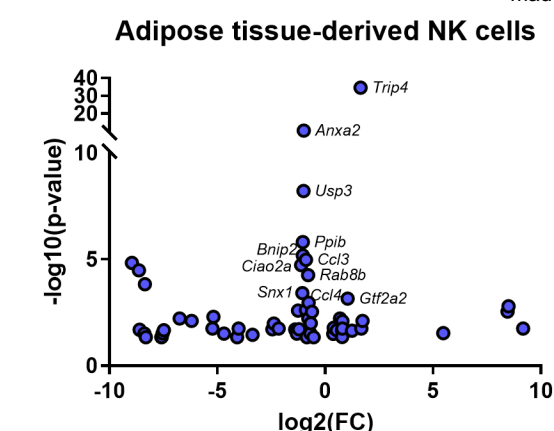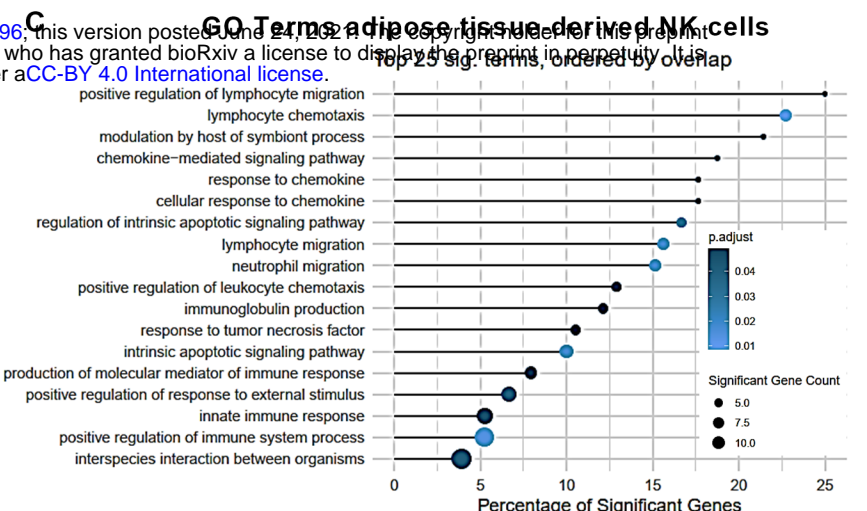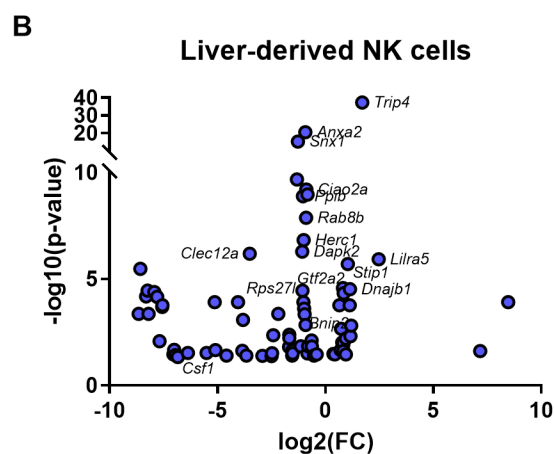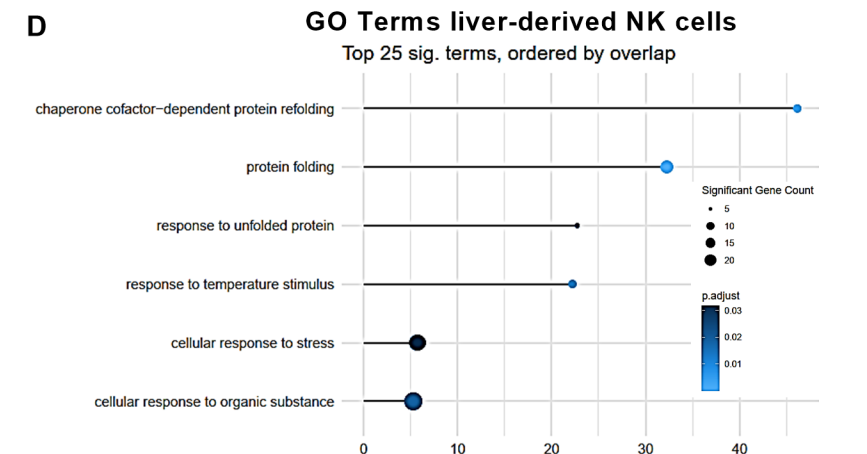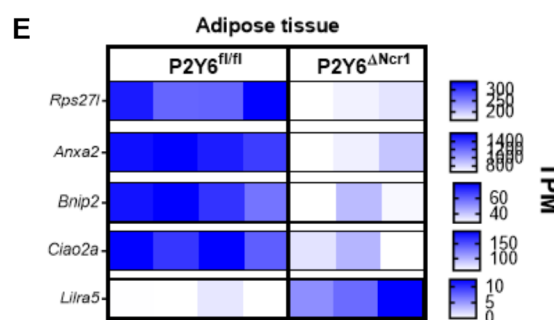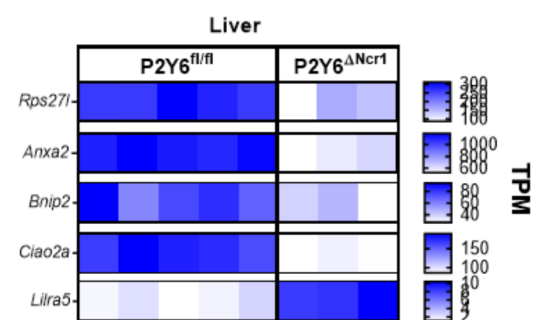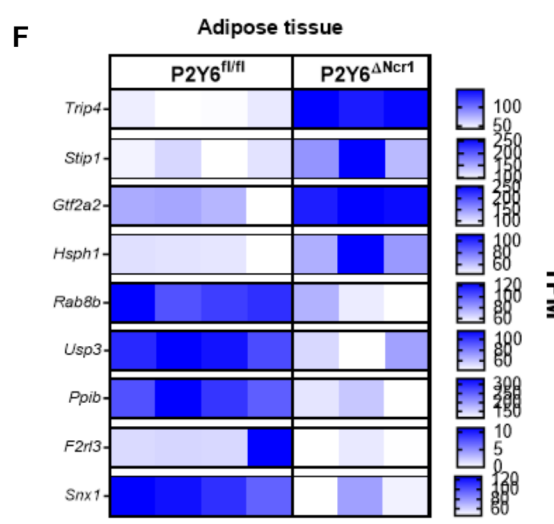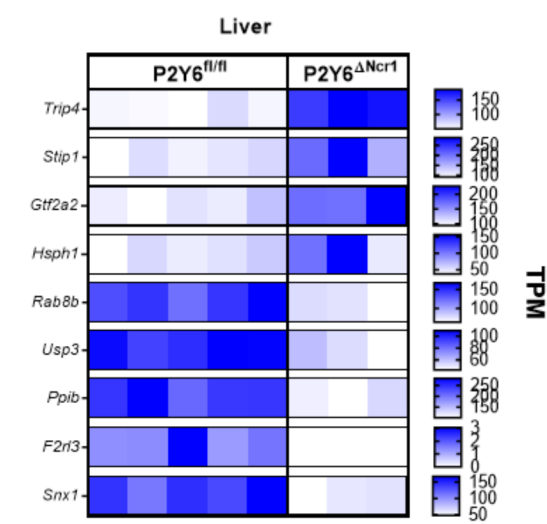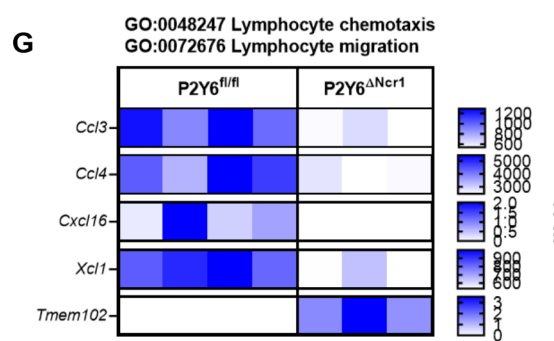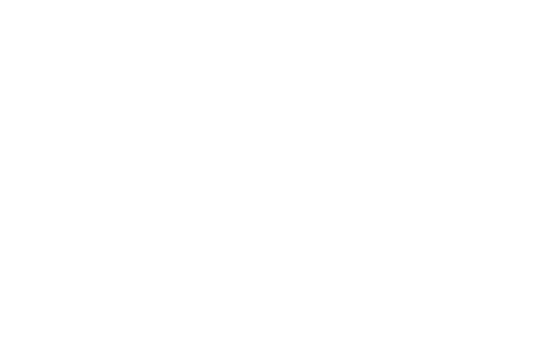



A

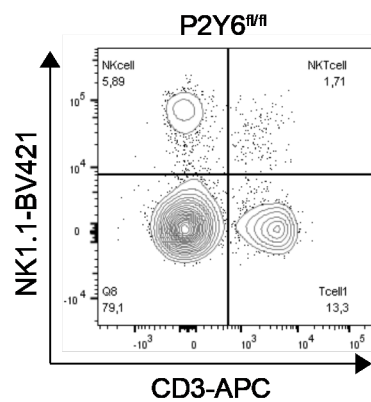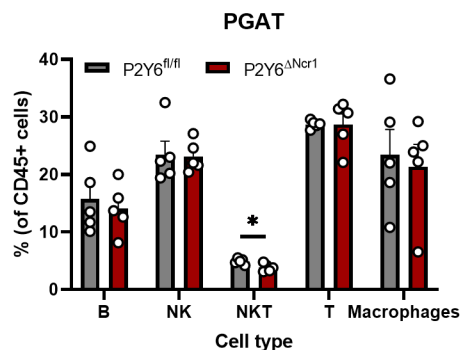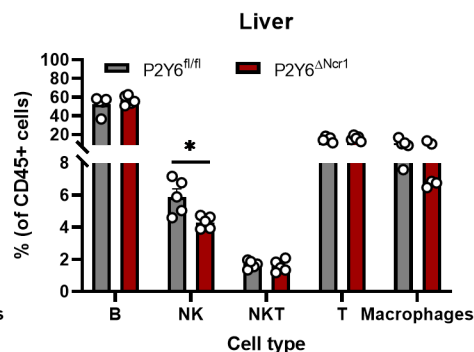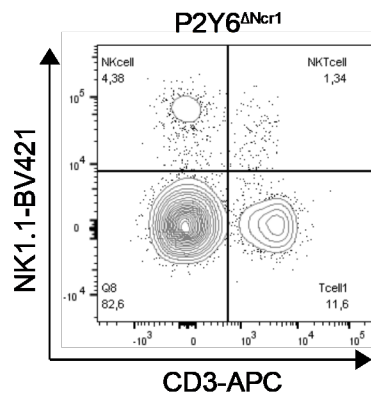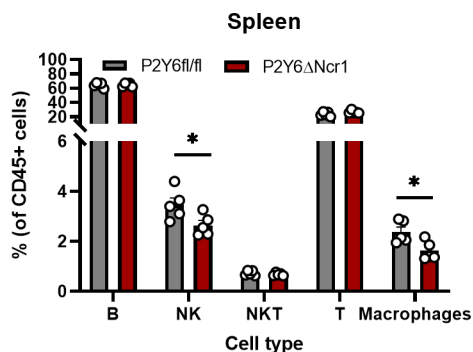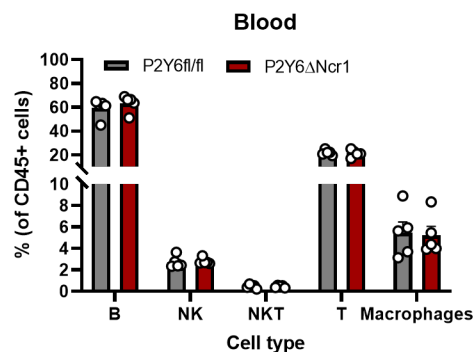

B

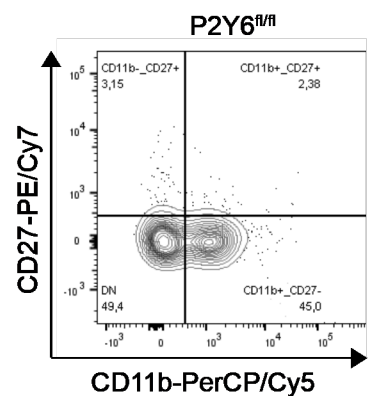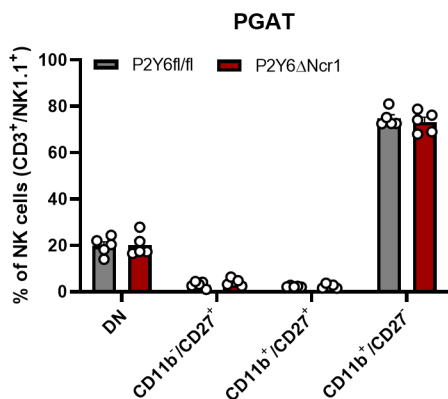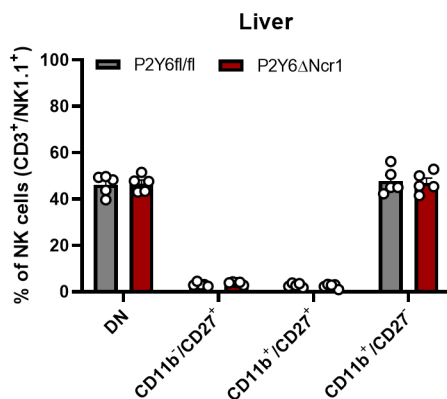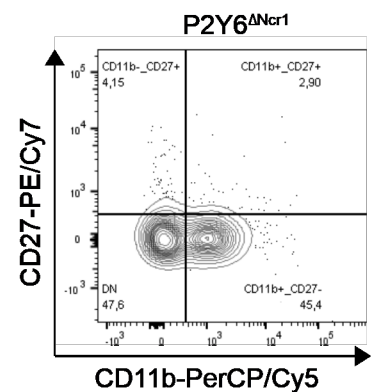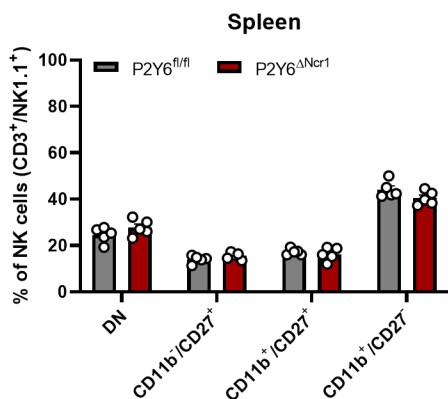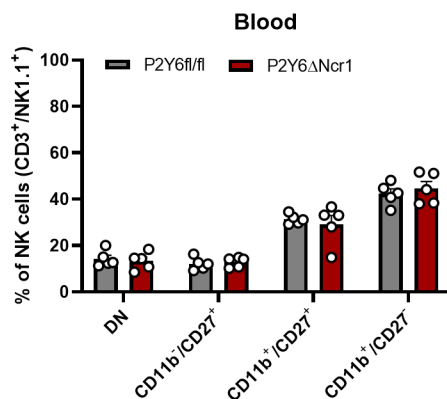

**A** Body weight development

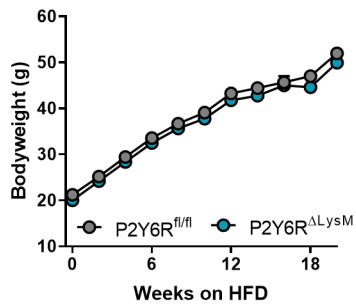

**B** Body composition

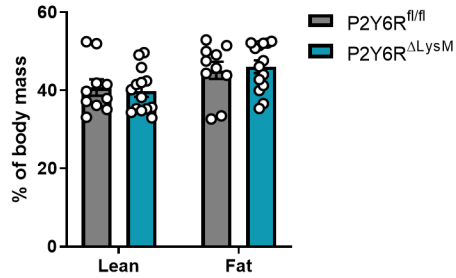

**C** ITT 9w HFD

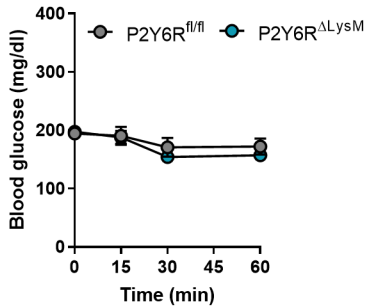

**D** ITT 14w HFD

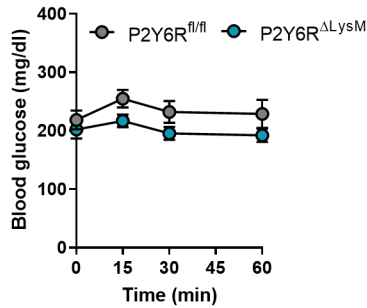

**E** ITT 20w HFD

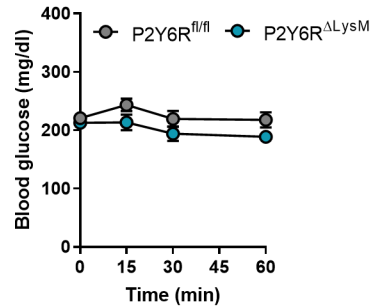

**F** GTT 10w HFD

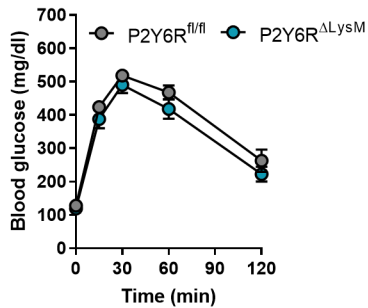

**G** GTT 15w HFD

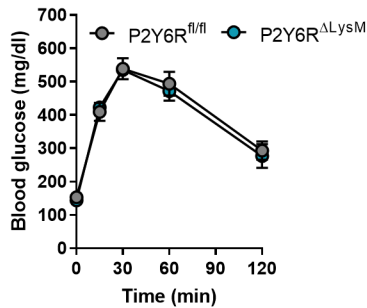

**H** GTT 21w HFD

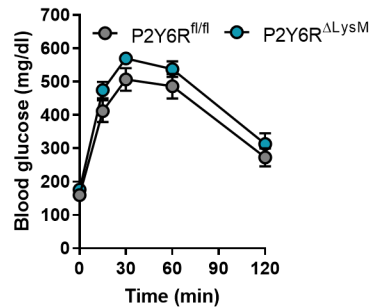

**I** Insulin

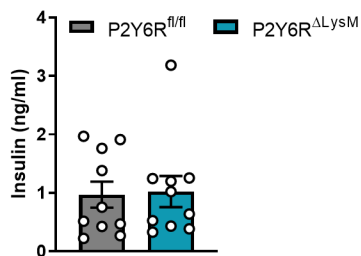

**J** Leptin

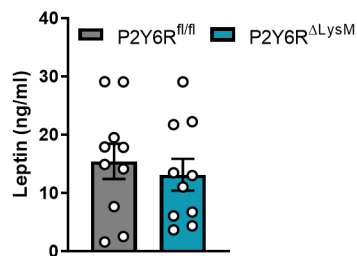

**K** HOMA-IR

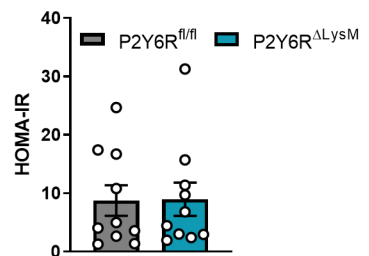

A

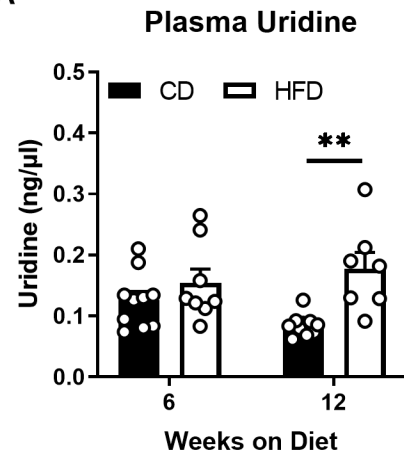

B

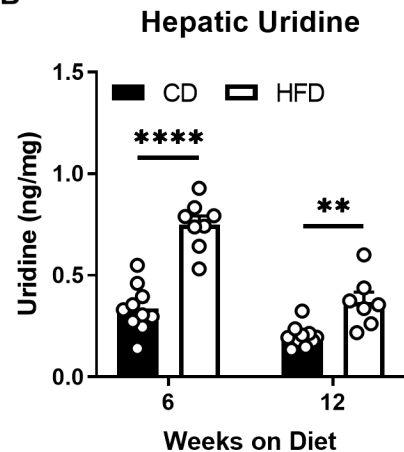

C

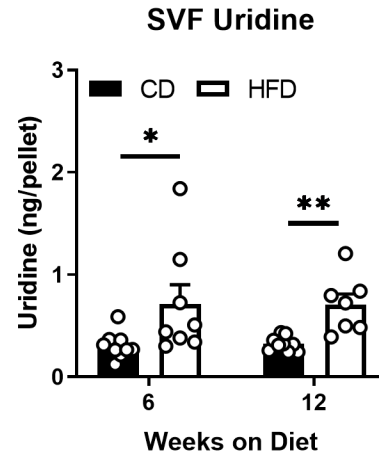

D

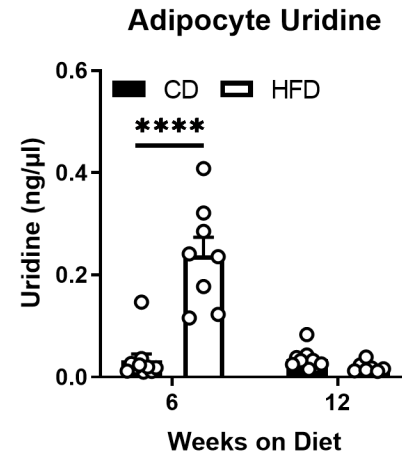

E

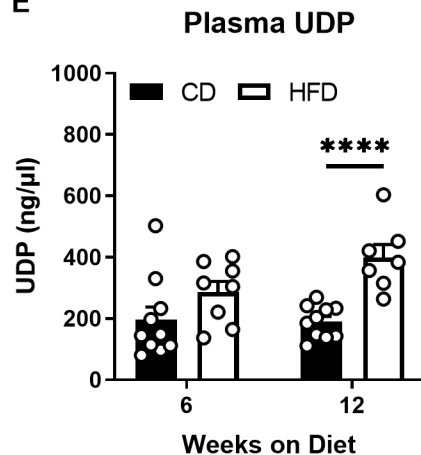

F

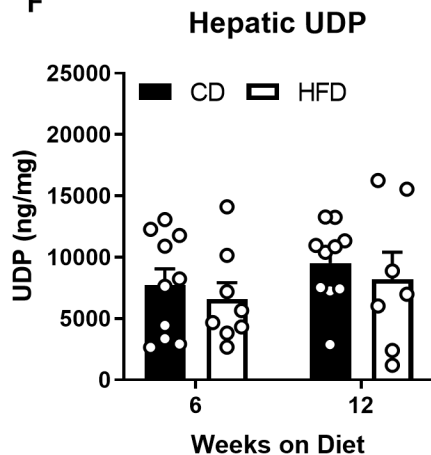

G

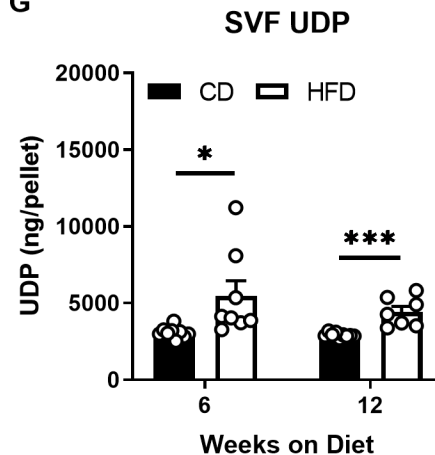

H

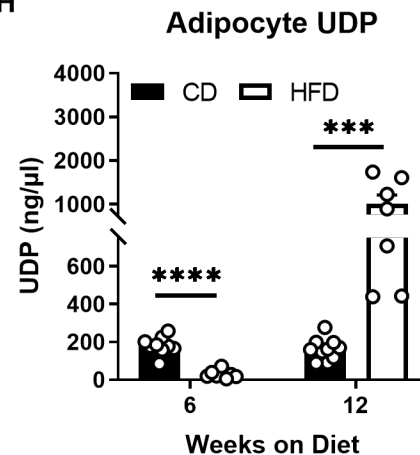

nonNK  
P2Y6<sup>fl/fl</sup>

nonNK  
P2Y6<sup>ΔNcr1</sup>

NK  
P2Y6<sup>fl/fl</sup>

NK  
P2Y6<sup>ΔNcr1</sup>

M

Ncr1-Cre

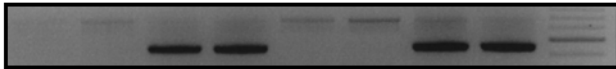

ΔP2Y6

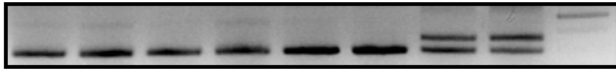

## A Body weight development

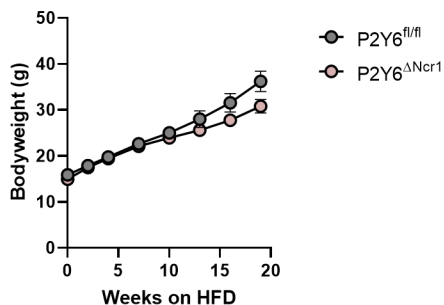

## B Organ weights

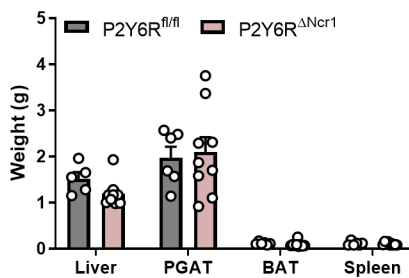

## C ITT 9w HFD

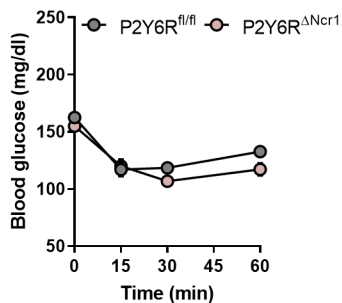

## D ITT 13w HFD

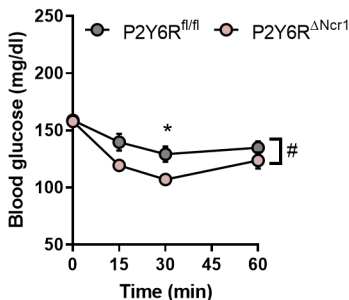

## E ITT 20w HFD

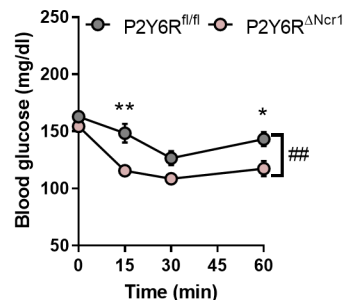

## F GTT 10w HFD

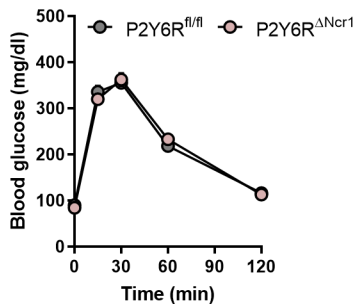

## G GTT 14w HFD

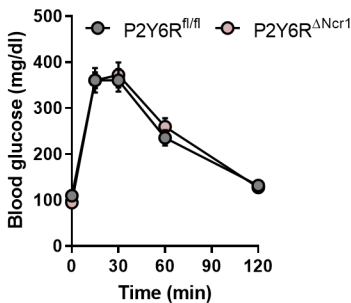

## H GTT 21w HFD

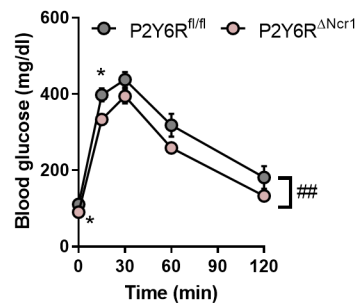

**A**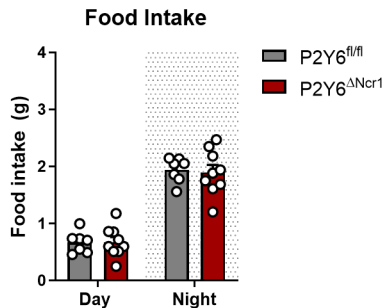**B**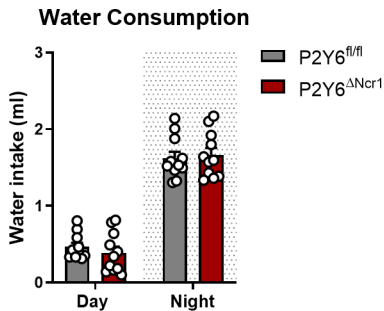**C**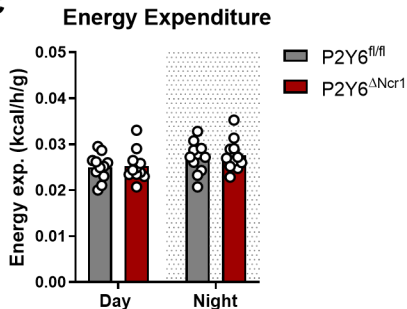**D**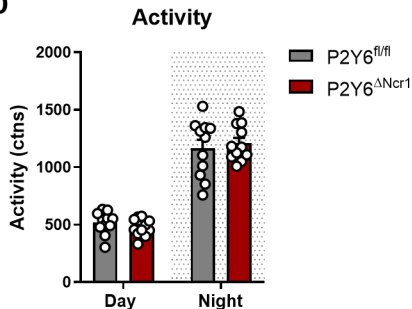



**A Body weight development**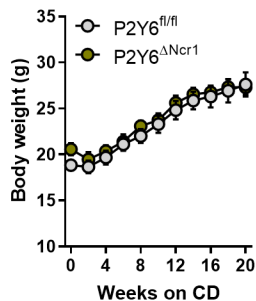**B Organ weights**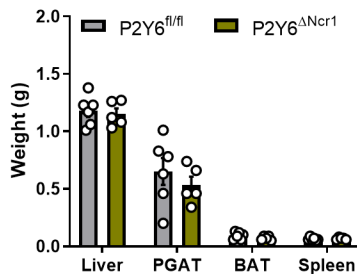**C ITT 9w CD**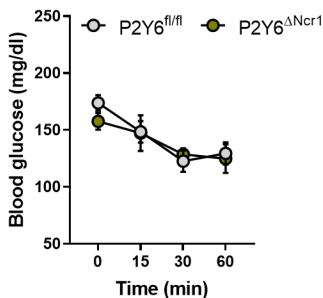**D ITT 13w CD**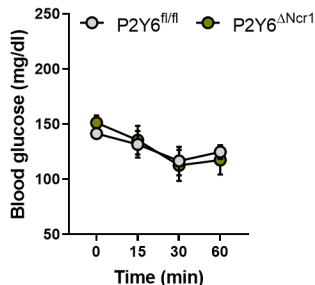**E ITT 20w CD**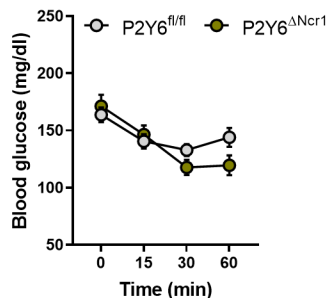**F GTT 10w CD**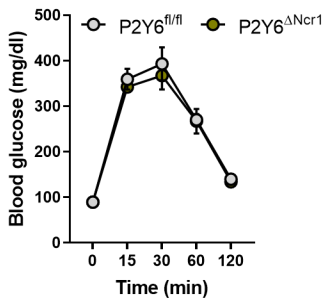**G GTT 14w CD**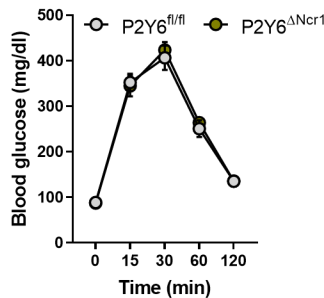**H GTT 21w CD**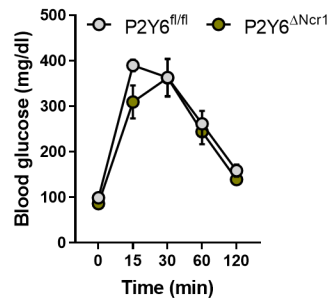**I Insulin  
10w CD**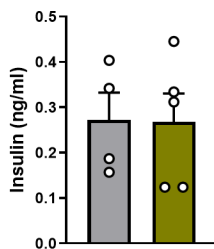**J HOMA-IR  
10w CD**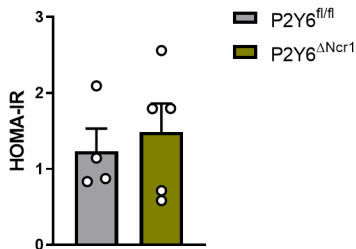

## Clamped PGAT

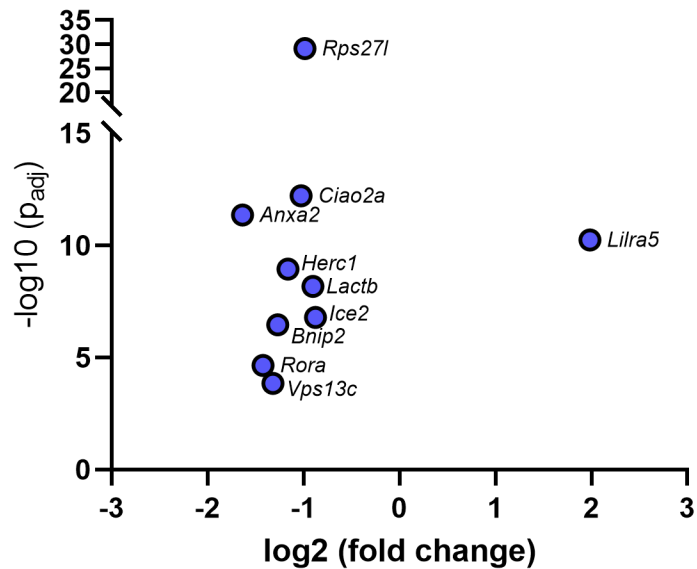

## Clamped Liver

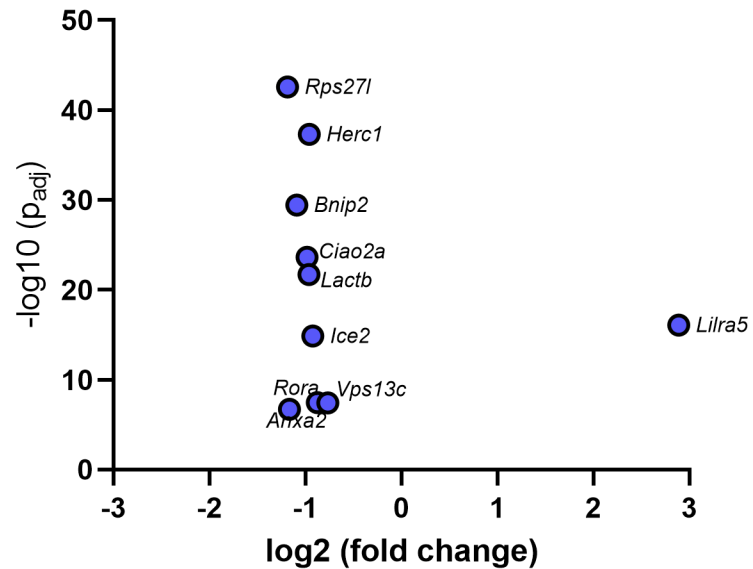

SSC-A

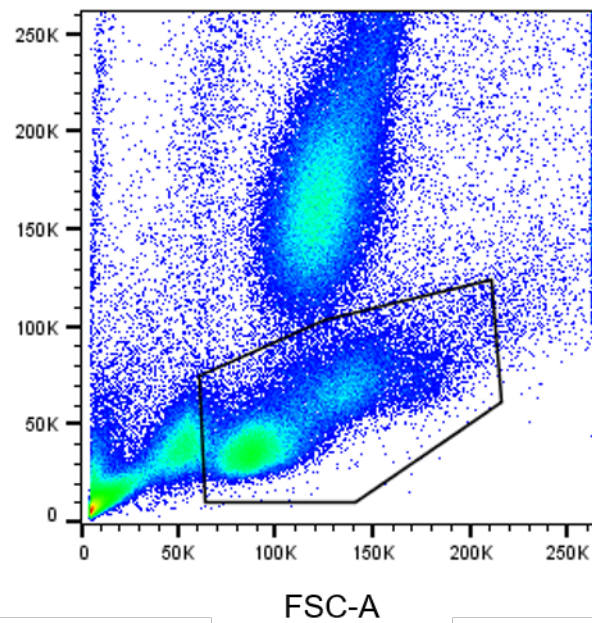

FSC-W

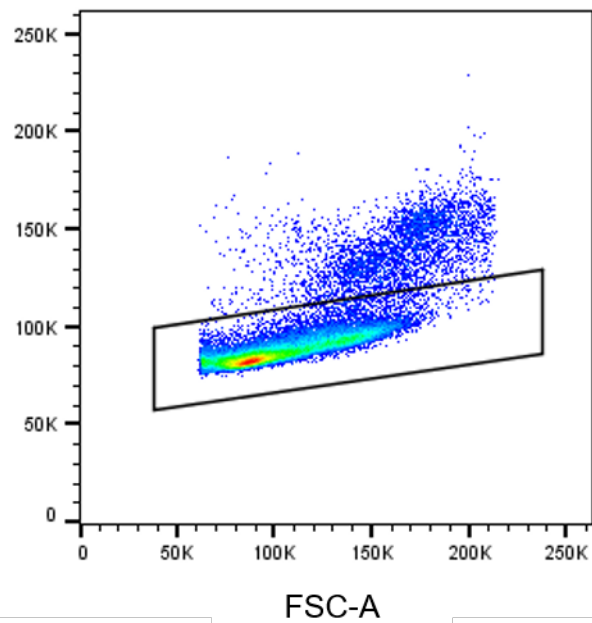

SSC-W

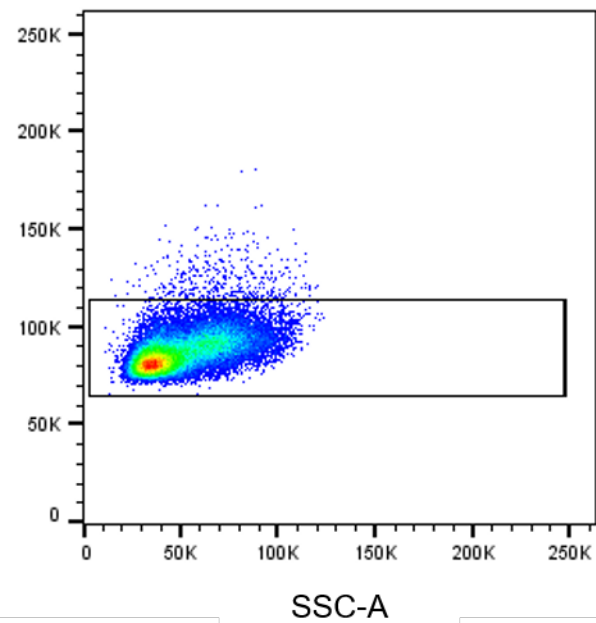

Zombie Aqua – BV510

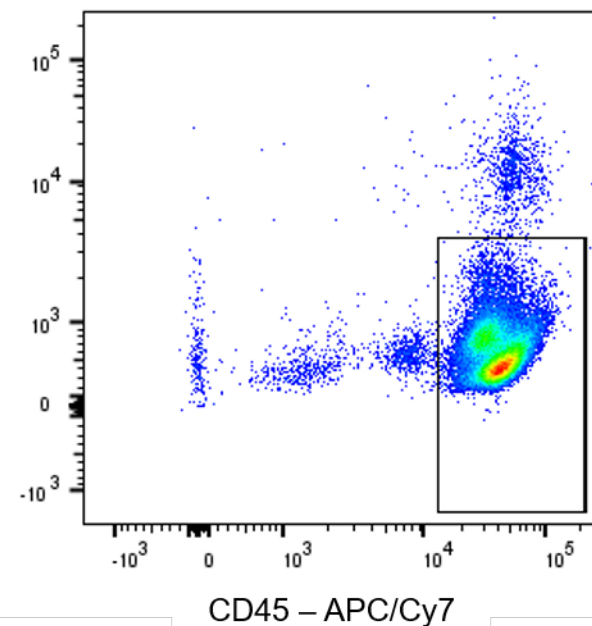

NK1.1 – AF488

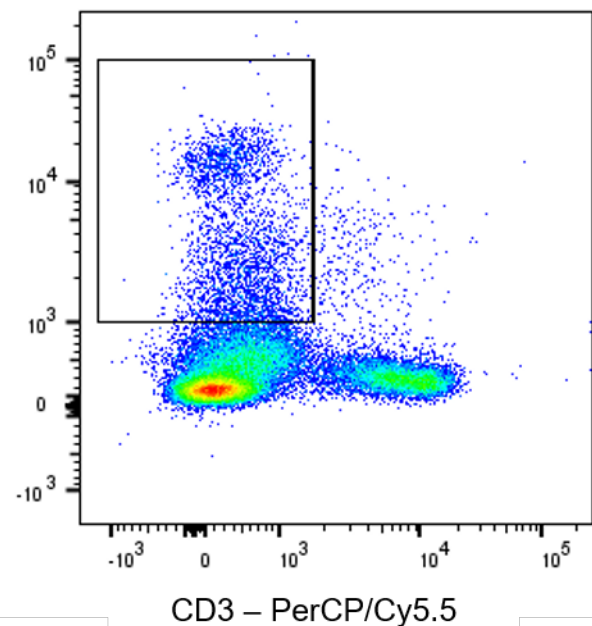

NK1.1 – AF488

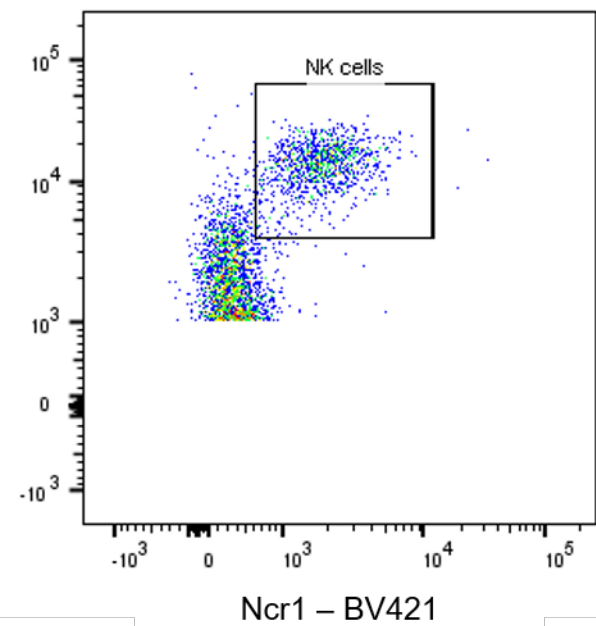

**A****MAC2 Staining PGAT**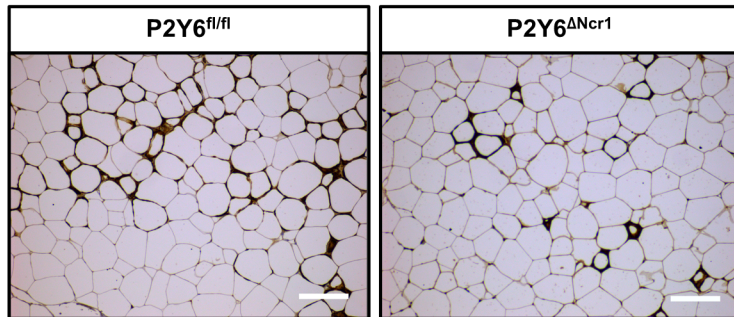**MAC2**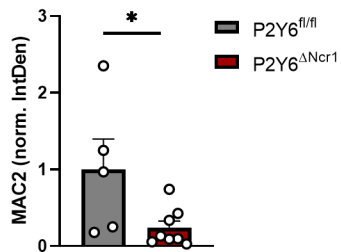**Adipocyte cell size**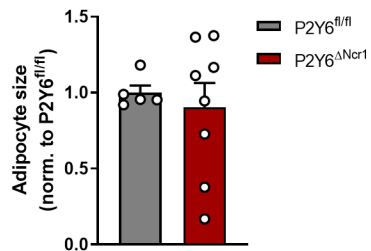**B****Inflammatory Markers PGAT**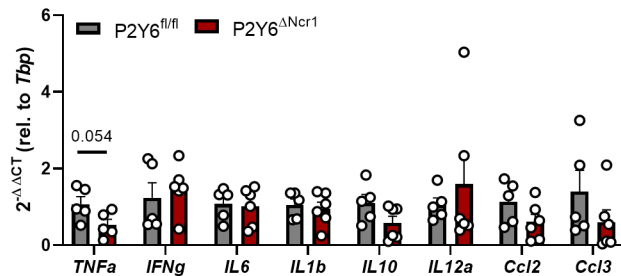**C****Inflammatory Markers Liver**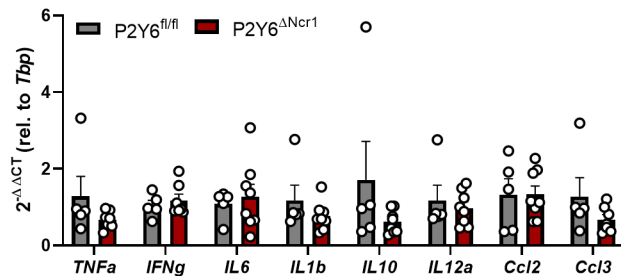

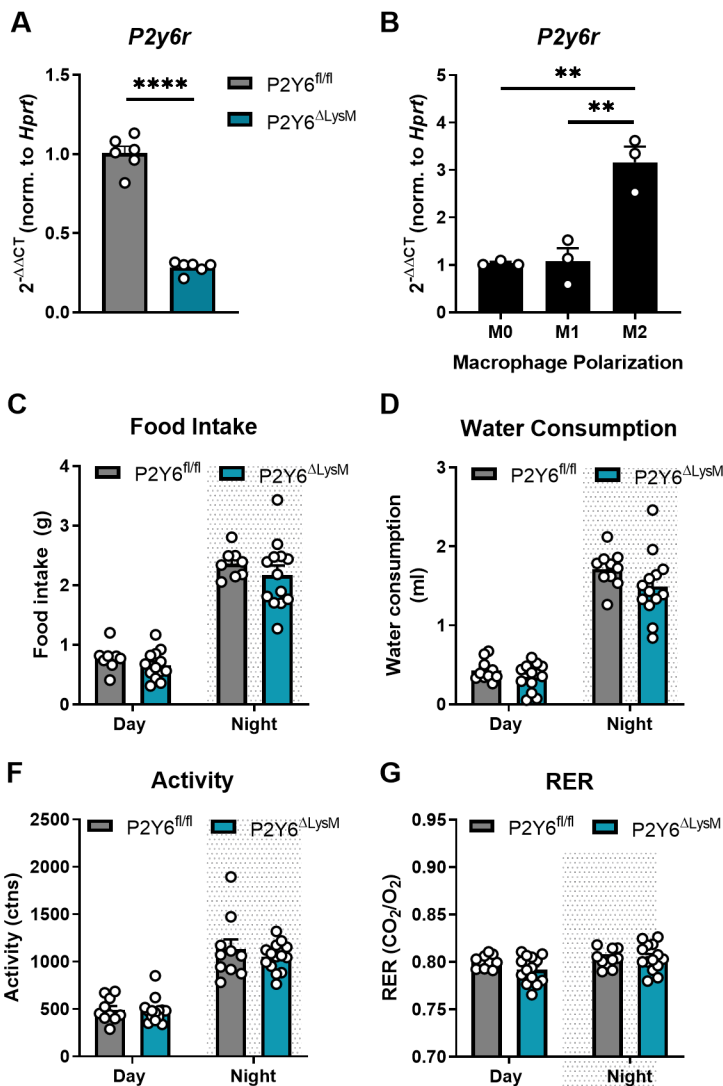

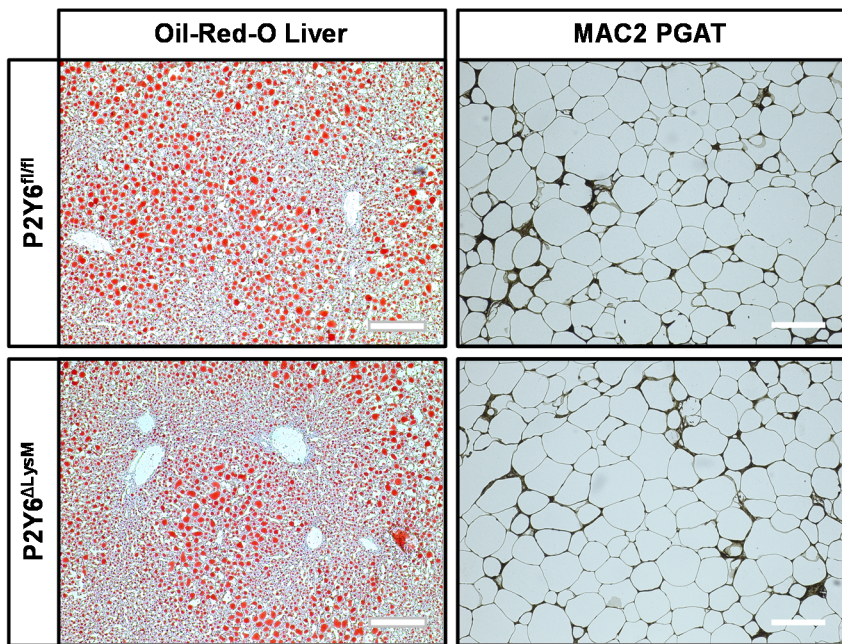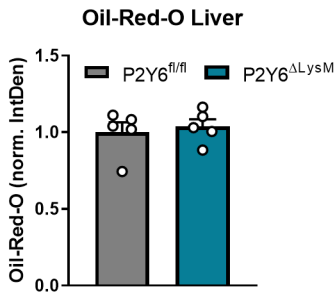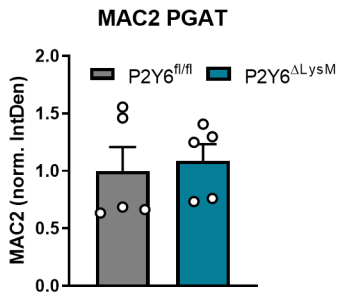

Source: http://biorxiv.org/content/10.1101/2021.06.23.449596v1.full.pdf
